# Supplementary material
Source: Research Square preprint supplement (doi:10.21203/rs.3.rs-9151448/v1)
Supplement: Supplementary file 1 [file 074892624b84351b0cb25ed4.xlsx]

## Sheet: Sheet1
No	First_Author	Year	Title	Journal	Quartile	Citations	DOI_URL	All_Authors	Abstract	DFT_Functional	Basis_Set	Software
1	M Bitew	2021	Pharmacokinetics and drug-likeness of antidiabetic flavonoids: Molecular docking and DFT study	Plos one	Q1	217	https://journals.plos.org/plosone/article?id=10.1371/journal.pone.0260853	M Bitew, T Desalegn, TB Demissie, A Belayneh…	… pharmacokinetic properties (ADME), … Density functional theory (DFT) calculations were also employed to calculate quantum chemical descriptors of the compounds. Molecular docking …	B3LYP	6-31G(d,p)	ORCA
2	Q Bai	2022	Application advances of deep learning methods for de novo drug design and molecular dynamics simulation	… Molecular Science	Q1	166	https://wires.onlinelibrary.wiley.com/doi/abs/10.1002/wcms.1581	Q Bai, S Liu, Y Tian, T Xu…	… TensorMol methods show low cost and good accuracy for molecular simulation when compared with the density functional theory (DFT) method. The next example, Gaussian …	CAM-B3LYP	6-31G(d,p)	Gaussian 09
3	O Noureddine	2021	Quantum chemical studies on molecular structure, AIM, ELF, RDG and antiviral activities of hybrid hydroxychloroquine in the treatment of COVID-19 …	Journal of King Saud …	Q2	145	https://www.sciencedirect.com/science/article/pii/S1018364720304481	O Noureddine, N Issaoui, M Medimagh…	… antiviral activity. Where hydroxychloroquine derivatives showed an apparent efficacy against coronavirus … Optimized structures of these molecules have been reported by using DFT …	M06-2X	6-31G(d,p)	Gaussian 16
4	TA Oliveira	2023	Virtual screening algorithms in drug discovery: a review focused on machine and deep learning methods	Drugs and Drug …	Q2	145	https://www.mdpi.com/2813-2998/2/2/17	TA Oliveira, MP Silva, EHB Maia, AM Silva…	… step in the early stage of drug discovery due to it having been … focus on machine learning (ML) and deep learning (DL). … used, and how they contribute to the drug discovery process. …	B3LYP	6-31G(d,p)	GAMESS
5	O Noureddine	2021	DFT and molecular docking study of chloroquine derivatives as antiviral to coronavirus COVID-19	Journal of King Saud University …	Q2	132	https://www.sciencedirect.com/science/article/pii/S1018364720303621	O Noureddine, N Issaoui, O Al-Dossary	… as potential antiviral for the treatment of COVID-19 diseases combining DFT and molecular … electrostatic potential were investigated using density functional theory (DFT) at the B3LYP/6…	B3LYP	6-31G(d,p)	Gaussian 16
6	S Liu	2022	Conceptual density functional theory: towards a new chemical reactivity theory	2022 - books.google.com	Q2	122	https://books.google.com/books?hl=en&lr=&id=38tqEAAAQBAJ&oi=fnd&pg=PT26&dq=conceptual+DFT+reactivity+descriptor+pharmaceutical&ots=_-NFFet6aw&sig=k83LN4kx4yWFzehbCxlBY2OcKO8	S Liu	… reactivity descriptors. In the early 1950s, Fukui emphasized the predominant role of the frontier orbitals in (certain types of) reactions… in studying chemical reactions and reactivity. One of …	B3LYP	6-311G(d,p)	Gaussian 16
7	M Anza	2021	Antimicrobial activity, in silico molecular docking, ADMET and DFT analysis of secondary metabolites from roots of three Ethiopian medicinal plants	… and Chemistry	Q2	95	https://www.tandfonline.com/doi/abs/10.2147/AABC.S323657	M Anza, M Endale, L Cardona, D Cortes…	… broad spectrum of biological activities. Clematis burgensis … antibacterial activity of dichloromethane crude extract and isolated compounds, in silico molecular docking, ADMET and …	B3LYP	6-31G(d,p)	Gaussian 16
8	KM Rana	2021	In silico DFT study, molecular docking, and ADMET predictions of cytidine analogs with antimicrobial and anticancer properties	In silico …	Q2	82	https://link.springer.com/article/10.1007/s40203-021-00102-0	KM Rana, J Maowa, A Alam, S Dey, A Hosen…	… Computational chemistry is a popular approach to calculate the physicochemical, spectral, … As a result of screening modified cytidine analogs for potential antimicrobial activity, we have …	ωB97X-D	cc-pVTZ	Gaussian 09
9	A Kasprzhitskii	2021	Corrosion inhibition properties of small peptides: DFT and Monte Carlo simulation studies	Journal of Molecular Liquids	Q2	79	https://www.sciencedirect.com/science/article/pii/S0167732221005079	A Kasprzhitskii, G Lazorenko	Using the computational methods of Density Functional Theory (DFT) and Monte Carlo (MC), we investigated the potential and mechanism of corrosion inhibition of iron, copper and …	B3LYP	6-31G(d,p)	ORCA
10	S Kaya	2023	The role of in Silico/DFT investigations in analyzing dye molecules for enhanced solar cell efficiency and reduced toxicity	Journal of Molecular Graphics and Modelling	Q2	75	https://www.sciencedirect.com/science/article/pii/S1093326323001341	S Kaya, A Thakur, A Kumar	… methods such as Conceptual density functional theory (CDFT) … In silico studies have been used to screen and design non-… limitations of CDFT and in silico studies and their potential …	M06-2X	6-31G(d,p)	Gaussian 16
11	M Aziz	2022	Deep learning and structure-based virtual screening for drug discovery against NEK7: a novel target for the treatment of cancer	Molecules	Q2	72	https://www.mdpi.com/1420-3049/27/13/4098	M Aziz, SA Ejaz, S Zargar, N Akhtar, AT Aborode…	… Deep learning (DP) models were used to predict drug target … from DFT studies revealed the reactive nature of the compounds. Moreover, the current study has utilized deep learning …	B3LYP	6-31G(d,p)	Gaussian 09
12	FE Abeng	2023	Combined electrochemical, DFT/MD-simulation and hybrid machine learning based on ANN-ANFIS models for prediction of doxorubicin drug as corrosion inhibitor for …	Computational and Theoretical Chemistry	Q2	69	https://www.sciencedirect.com/science/article/pii/S2210271X2300316X	FE Abeng, VC Anadebe	… In this work, Doxorubicin drug was used as mild … DFT/ molecular dynamic simulation (MDS), Scanning electron microscopic (SEM), were used for proper evaluation of Doxorubicin drug …	PBE0	6-311G(d,p)	Gaussian 16
13	N Flores-Holguín	2021	In silico pharmacokinetics, ADMET study and conceptual DFT analysis of two plant cyclopeptides isolated from rosaceae as a computational Peptidology approach	Frontiers in Chemistry	Q2	69	https://www.frontiersin.org/journals/chemistry/articles/10.3389/fchem.2021.708364/full	N Flores-Holguín, J Frau, D Glossman-Mitnik	… In this research, some ADME parameters were estimated with the aid of Chemicalize and the online available SwissADME software (Daina et al., 2017).Additional information about the …	ωB97X-D	6-31G(d,p)	ORCA
14	YT Hussein	2023	DFT analysis and in silico exploration of drug-likeness, toxicity prediction, bioactivity score, and chemical reactivity properties of the urolithins	Journal of Biomolecular Structure and …	Q2	62	https://www.tandfonline.com/doi/abs/10.1080/07391102.2021.2017350	YT Hussein, YH Azeez	… main quantum chemical descriptors for the assessment and evaluating biological activity. … In this work, the drug likeness, toxicity, biological activity, and chemical reactivity descriptors …	B3LYP	6-311G(d,p)	Gaussian 16
15	M Canakdag	2025	Comprehensive evaluation of purine analogues: Cytotoxic and antioxidant activities, enzyme inhibition, DFT insights, and molecular docking analysis	Journal of Molecular …	Q2	61	https://www.sciencedirect.com/science/article/pii/S0022286024033064	M Canakdag, M Feizi-Dehnayebi, S Kundu…	… antioxidant, cytotoxic activity, and enzyme inhibition, alongside in-depth computational assessments using density functional theory (DFT) and … , and subjected to antioxidant assays to …	B3LYP	6-31G(d,p)	ORCA
16	T Erdogan	2021	DFT, molecular docking and molecular dynamics simulation studies on some newly introduced natural products for their potential use against SARS-CoV-2	Journal of molecular structure	Q2	60	https://www.sciencedirect.com/science/article/pii/S0022286021008668	T Erdogan	… After DFT calculations, geometry optimized structures were subjected to molecular docking … In the next part of the study, molecular dynamics (MD) simulations were performed on the …	B3LYP	6-31G(d,p)	Gaussian 16
17	S Lakhera	2022	Modelling the DFT structural and reactivity study of feverfew and evaluation of its potential antiviral activity against COVID-19 using molecular docking and MD …	Chemical Papers	Q2	57	https://link.springer.com/article/10.1007/s11696-022-02067-6	S Lakhera, K Devlal, A Ghosh, P Chowdhury, M Rana	… In the present work, we have studied the antiviral behavior of feverfew plant in treating COVID-19. We have reported a systematic in silico study with the antiviral effects of various …	B3LYP	6-31G(d,p)	VASP
18	C Duan	2021	Putting density functional theory to the test in machine-learning-accelerated materials discovery	The Journal of Physical …	Q2	56	https://pubs.acs.org/doi/abs/10.1021/acs.jpclett.1c00631	C Duan, F Liu, A Nandy, HJ Kulik	… known a priori how the discovery process will be influenced by the choice of method. Here, approximate DFT is applied nearly exclusively, and DFT functionals that perform well for one …	B3LYP	6-31G(d,p)	Gaussian 16
19	R Rahimi	2022	B3O3 monolayer with dual application in sensing of COVID-19 biomarkers and drug delivery for treatment purposes: A periodic DFT study	Journal of Molecular Liquids	Q2	53	https://www.sciencedirect.com/science/article/pii/S0167732222003932	R Rahimi, M Solimannejad	… , this nanosheet can also deliver a Baricitinib drug to the target … drug indicates that adsorptions of the drug over B 3 O 3 nanosheet are energetically favorable with energy adsorption in …	B3LYP	6-31G(d,p)	Gaussian 16
20	S Akkoc	2023	Drug design of new therapeutic agents: Molecular docking, molecular dynamics simulation, DFT and POM analyses of new Schiff base ligands and impact of …	… and Dynamics	Q2	53	https://www.tandfonline.com/doi/abs/10.1080/07391102.2022.2111360	S Akkoc, H Karatas, MT Muhammed…	… Computer-aided drug design (CADD) methods have been applied in drug … Hence, molecular docking, molecular dynamics (MD) simulation, density functional theory (DFT) calculations …	B3LYP	6-31G(d,p)	Gaussian 16
21	SMA Kawsar	2024	In Silico Pharmacokinetics, Molecular Docking and Molecular Dynamics Simulation Studies of Nucleoside Analogs for Drug Discovery- A Mini Review	Mini Reviews in …	Q2	53	https://www.benthamdirect.com/content/journals/mrmc/10.2174/0113895575258033231024073521	SMA Kawsar, NS Munia, S Saha…	… used in drug discovery and development to provide … , frontier molecular orbital behavior, and molecular electrostatic properties [… Density functional theory (DFT) is a quantum mechanical …	B3LYP	6-31G(d,p)	VASP
22	M Sankarganesh	2021	… with pyrimidine- and morpholine-based ligand: synthesis, spectroscopic, DFT, TDDFT, catalytic reduction, in vitro anticancer, antioxidant, antimicrobial, DNA binding …	Journal of …	Q2	51	https://www.tandfonline.com/doi/abs/10.1080/07391102.2020.1727364	M Sankarganesh, R Vijay Solomon…	… Density functional theory (DFT) calculations combined with … have been optimized using DFT calculations. To understand the … The percentage growth inhibition was determined using the …	B3LYP	6-31G(d,p)	GAMESS
23	P Geerlings	2022	From density functional theory to conceptual density functional theory and biosystems	Pharmaceuticals	Q2	48	https://www.mdpi.com/1424-8247/15/9/1112	P Geerlings	… reactivity of the reactant molecule 1 and can be considered as reactivity indicators/descriptors … With increasing order, the direct use of these reactivity descriptors is expected to be …	B3LYP	6-31G(d,p)	Gaussian 16
24	S Bharadwaj	2021	Structure-based screening and validation of bioactive compounds as Zika virus methyltransferase (MTase) inhibitors through first-principle density functional theory …	Journal of …	Q2	43	https://www.tandfonline.com/doi/abs/10.1080/07391102.2020.1747545	S Bharadwaj, AK Rao, VD Dwivedi…	… Recently structure-based virtual screening has been employed in the discovery of lead drug … In this study, following 10% sequential virtual screening of HTVS and SP, XP screening …	B3LYP	cc-pVTZ	ORCA
25	S Sukumaran	2024	… of FDA approved drug gemcitabine and docetaxel for enhanced anti‐breast cancer activity: DFT, docking, molecular dynamics simulation and pharmacophore studies	… Journal of Quantum …	Q2	43	https://onlinelibrary.wiley.com/doi/abs/10.1002/qua.27359	S Sukumaran, A Zochedh, K Chandran…	… for virtual screening [26]. The use of molecular docking simulation in structure-based drug design … Molecular dynamic simulation is helpful in understanding the stability of the GEDT with …	B3LYP	6-31G(d,p)	GAMESS
26	RBO Ouma	2024	A review of the current trends in computational approaches in drug design and metabolism	Discover Public Health	Q2	41	https://link.springer.com/article/10.1186/s12982-024-00229-3	RBO Ouma, SM Ngari, JK Kibet	… Computational tools and methods for drug design and development such as molecular … mechanics (QM/MM), and Density functional theory (DFT) have been reviewed. Accordingly, the …	M06-2X	6-31G(d,p)	Gaussian 09
27	C Sandoval-Pauker	2023	Computational chemistry as applied in environmental research: opportunities and challenges	ACS ES&T …	Q2	40	https://pubs.acs.org/doi/abs/10.1021/acsestengg.3c00227	C Sandoval-Pauker, S Yin, A Castillo…	… chemistry techniques in areas of environmental chemistry … Time-dependent density functional theory (TD-DFT) is an … study of the toxic effects of chemicals using QSAR include the …	B3LYP	6-311G(d,p)	Gaussian 09
28	S Ahmed	2021	Virtual screening, molecular dynamics, density functional theory and quantitative structure activity relationship studies to design peroxisome proliferator-activated …	Journal of …	Q2	39	https://www.tandfonline.com/doi/abs/10.1080/07391102.2020.1714482	S Ahmed, N Islam, M Shahinozzaman…	Full article: Virtual screening, molecular dynamics, density functional theory and quantitative structure activity relationship studies to design peroxisome proliferator-activated receptor-γ …	B3LYP	6-31G(d,p)	Gaussian 16
29	S El-Kalyoubi	2021	Synthesis, in silico prediction and in vitro evaluation of antimicrobial activity, dft calculation and theoretical investigation of novel xanthines and uracil containing …	International Journal of …	Q2	39	https://www.mdpi.com/1422-0067/22/20/10979	S El-Kalyoubi, F Agili, WA Zordok…	… quantum chemical parameters depending upon the energy values of HOMO and LUMO were calculated as global softness (S), electro negativity (χ), absolute softness (σ), chemical …	B3LYP	6-31G(d,p)	Gaussian 16
30	L Feng	2023	… Naproxen in aqueous matrices: Elucidating the intermediates' eco-toxicity, by assessing its degradation pathways via experimental and density functional theory (DFT …	Chemical Engineering …	Q2	39	https://www.sciencedirect.com/science/article/pii/S1385894722039651	L Feng, W Song, N Oturan, M Karbasi…	… via LC, while density functional theory (DFT) was applied to … The formation of toxic intermediates with higher toxicity than … solution toxicity indicated that the formed toxic …	B3LYP	6-31G(d,p)	GAMESS
31	AM Abuelela	2023	Electrochemical and DFT studies of Terminalia bellerica fruit extract as an eco-friendly inhibitor for the corrosion of steel	Scientific reports	Q1	38	https://www.nature.com/articles/s41598-023-45283-0	AM Abuelela, J Kaur, A Saxena, MA Bedair…	… The corrosion prevention activity was studied on the steel in 1 MH 2 SO 4 using a variety of … ), electrochemical impedance spectroscopy (EIS), density functional theory (DFT), natural …	B3LYP	6-31G(d,p)	VASP
32	M Alam	2023	… , characterization, antibacterial activity of thiosemicarbazones derivatives and their computational approaches: Quantum calculation, molecular docking …	Heliyon	Q2	38	https://www.cell.com/heliyon/fulltext/S2405-8440(23)03429-1?uuid=uuid%3A34fc8485-d0c4-4363-8930-be24ed4d2ef9	M Alam, MN Abser, A Kumer, MMH Bhuiyan, P Akter…	… in silico study [11,12], where the Density Functional Theory (… that locates out in computational chemistry is to categorize … These all molecules are optimized through the DFT functional …	B3LYP	LANL2DZ	ORCA
33	MA Bedair	2023	… adsorption and corrosion inhibition properties of newly synthesized diazinyl derivatives for mild steel in hydrochloric acid: synthesis, electrochemical, SRB biological …	RSC …	Q2	37	https://pubs.rsc.org/en/content/articlehtml/2023/ra/d2ra06574f	MA Bedair, HM Elaryian, ES Gad, M Alshareef…	… plasma-optical emission spectroscopy were used to verify the … Density functional theory (DFT) has become a helpful strategy … compounds TODB and DODB have good biological activity …	B3LYP	6-311G(d,p)	Gaussian 16
34	S Karoui	2024	Molecular Docking, Molecular Dynamics, PKCSM Drug‐Likeness Profiles, Toxicity, and DFT study of the antioxidant and anticancer activities of three flavonoid …	…	Q2	37	https://chemistry-europe.onlinelibrary.wiley.com/doi/abs/10.1002/slct.202401776	S Karoui, O Khaoua, N Benbellat, S Antonczak…	… As enzyme inhibitors, Isoquercitin shows strong activity with a score of 0.42, while Ophioglonol and Quercetin exhibit moderate to strong activity with scores of 0.33 and 0.28, respectively…	CAM-B3LYP	6-31G(d,p)	Gaussian 16
35	MG Golafshani	2023	MD and DFT computational simulations of Caffeoylquinic derivatives as a bio-corrosion inhibitor from quince extract with experimental investigation of corrosion …	Journal of Molecular …	Q2	36	https://www.sciencedirect.com/science/article/pii/S0022286022023468	MG Golafshani, H Tavakoli, SA Hosseini…	… spectroscopy confirmed that the extract contains nitrogen atoms, oxygen atoms, and aromatic rings that are known to have corrosion inhibition … (MD), density functional theory (DFT), and …	PBE0	cc-pVTZ	ORCA
36	SS Mishra	2021	… investigation of potential inhibitors of novel coronavirus 2019 through structure-based virtual screening, molecular dynamics and density functional theory studies	Journal of …	Q2	36	https://www.tandfonline.com/doi/abs/10.1080/07391102.2020.1791957	SS Mishra, S Ranjan, CS Sharma…	Full article: Computational investigation of potential inhibitors of novel coronavirus 2019 through structure-based virtual screening, molecular dynamics and density functional theory …	M06-2X	6-311G(d,p)	GAMESS
37	A IŞIK	2022	Benzimidazole-hydrazone derivatives: Synthesis, in vitro anticancer, antimicrobial, antioxidant activities, in silico DFT and ADMET studies	Journal of …	Q2	35	https://avesis.cumhuriyet.edu.tr/yayin/73ccb0df-5592-439b-8917-81b0ca285ade/benzimidazole-hydrazone-derivatives-synthesis-in-vitro-anticancer-antimicrobial-antioxidant-activities-in-silico-dft-and-admet-studies	A IŞIK, U Acar Çevik, I Çelik…	… , antifungal, anticancer, and antioxidant activities. Density Functional Theory (DFT) is a use… derivatives and their transition metal complexes as topoisomerease II inhibitors, Eur. J. Med. …	B3LYP	6-31G(d,p)	GAMESS
38	MI Khan	2021	Adsorption mechanism of Palbociclib anticancer drug on two different functionalized nanotubes as a drug delivery vehicle: A first principle's study	Applied Surface Science	Q1	33	https://www.sciencedirect.com/science/article/pii/S0169433221002051	MI Khan, I Nadeem, A Majid, M Shakil	… adsorption prospects of PLB drug on the functionalized nanotubes are investigated in detail. The structural parameters and adsorption characteristics indicate that drug release is … drug …	B3LYP	cc-pVTZ	ORCA
39	YK Lee	2021	Density functional theory (DFT) calculations and catalysis	Catalysts	Q2	32	https://www.mdpi.com/2073-4344/11/4/454	YK Lee	… Theoretical studies are suitable for studying chemical reactivity and modeling complex catalytic reaction pathways. Density functional theory (DFT) … and theory obtained from DFT-based …	M06-2X	6-31G(d,p)	ORCA
40	MAA Ibrahim	2023	Adsorption of Favipiravir on pristine graphene nanosheets as a drug delivery system: A DFT study	RSC …	Q2	31	https://pubs.rsc.org/en/content/articlehtml/2023/ra/d3ra03227b	MAA Ibrahim, MHA Hamad, AHM Mahmoud…	… was corrected using the Grimme (DFT-D2) method. … periodic cells in the z-direction, a vacuum with a thickness of 20 Å was created along the vertical direction of the GN surface …	B3LYP	6-311G(d,p)	Gaussian 16
41	L El Ghayati	2021	… , spectroscopic characterizations, Hirshfeld surface analyses, molecular docking studies, DFT calculations, corrosion inhibition anticipation, and antibacterial activities	Journal of …	Q2	29	https://onlinelibrary.wiley.com/doi/abs/10.1002/jhet.4167	L El Ghayati, Y Sert, NK Sebbar, Y Ramli…	… Their structures were clarified on the basis of spectral data and confirmed by single-crystal X… They are also characterized using DFT to compute and predict the corresponding spectral …	B3LYP	cc-pVTZ	Gaussian 16
42	EA Eno	2022	Modeling of Re (I) tricarbonyl complexes against SARS-CoV-2 receptor via DFT, in-silico molecular docking, and QSAR	Chemical Physics …	Q2	29	https://www.sciencedirect.com/science/article/pii/S2667022422000433	EA Eno, H Louis, TO Unimuke, TE Gber…	… DFT studies, in silico molecular docking, and multilinear regression analysis (MLRA) investigations of eight (8) selected biologically active … The atomistic DFT modeling was conducted …	B3LYP	6-31G(d,p)	GAMESS
43	I Ahmad	2023	Application of density functional theory (DFT) and response surface methodology (RSM) in drug discovery	…	Q2	27	https://www.sciencedirect.com/science/article/pii/B9780323905930000046	I Ahmad, V Jagatap, H Patel	… Density functional theory (DFT) is the most extensively used and renowned quantum theory … The current chapter discusses the potential uses of DFT in drug designing of the …	B3LYP	6-31G(d,p)	ORCA
44	L Golea	2023	Synthesis, characterization of some substituted Quinolines derivatives: DFT, computational, in silico ADME, molecular docking and biological activities	Chemical Data Collections	Q2	24	https://www.sciencedirect.com/science/article/pii/S2405830022001495	L Golea, R Chebaki, M Laabassi, P Mosset	… compounds were evaluated for antibacterial activity against one Gram-positive bacteria, and two Gram-negative bacteria. The result showed moderate antimicrobial activities. Also, …	ωB97X-D	6-31G(d,p)	Gaussian 16
45	J Kashyap	2022	Drug repurposing for SARS-CoV-2: a high-throughput molecular docking, molecular dynamics, machine learning, and DFT study	Journal of materials science	Q1	24	https://link.springer.com/article/10.1007/s10853-022-07195-8	J Kashyap, D Datta	… This accounts for the efficacy of the drug discovery pipeline chosen in this work. Furthermore, in multiple cases, the same drug demonstrated good binding potential to various proteins …	B3LYP	6-31G(d,p)	Gaussian 16
46	V Andonova	2024	Spectral Characteristics, In Silico Perspectives, Density Functional Theory (DFT), and Therapeutic Potential of Green-Extracted Phycocyanin from Spirulina	International Journal of …	Q2	23	https://www.mdpi.com/1422-0067/25/17/9170	V Andonova, K Nikolova, I Iliev, S Georgieva…	… This study also involves an in silico assessment of the diverse applications of green pigment … Based on the in silico analysis, PC holds promise for various applications due to its safety, …	B3LYP	6-311G(d,p)	ORCA
47	A Shah	2024	Discovery of novel anticancer flavonoids as potential HDAC2 inhibitors: virtual screening approach based on molecular docking, DFT and molecular dynamics …	3 Biotech	Q2	22	https://link.springer.com/article/10.1007/s13205-023-03912-5	A Shah, A Choudhary, M Jain, S Perumal, V Patel…	… The ADMET profiles of these compounds are extremely important for drug development. … of a molecular dynamic simulation of a protein–ligand docked complex. Molecular dynamics …	B3LYP	6-311G(d,p)	Gaussian 16
48	BK Chagaleti	2024	… inhibitors for cancer treatment: integrating ligand-based pharmacophore modelling, molecular docking, DFT, ADMET, and molecular dynamics simulation studies	Beni-Suef University Journal …	Q2	22	https://link.springer.com/article/10.1186/s43088-024-00577-8	BK Chagaleti, V Saravanan, MK Kathiravan	… balances favourable pharmacokinetic characteristics with … ADME online predictor to assess the ADME properties of small compounds, and Molinspiration to review the pharmacokinetic …	B3LYP	6-31G(d,p)	Gaussian 16
49	S Esfahani	2024	Adsorption of ibuprofen by an iron-doped silicon carbide graphene monolayer: DFT exploration of drug delivery insights	International Journal of …	Q2	21	http://oiccpress.com/ijnd/article/view/4404	S Esfahani, J Akbari…	… for exploring insights into the drug delivery of ibuprofen (IBU) by … Indeed, the availability of a suitable surface area made the … delivery of mercaptopurine anticancer drug: A periodic DFT …	B3LYP	6-31G(d,p)	Gaussian 09
50	A Bag	2021	DFT based Computational Methodology of IC50 Prediction	Current computer-aided drug design	Q2	20	https://www.benthamdirect.com/content/journals/cad/10.2174/1573409916666200219115112	A Bag	… For the computation of the electric dipole moments and reactivity descriptors (ω) of the test … use any advanced quantum computation method like density functional theory (DFT) [27, 28], …	B3LYP	6-31G(d,p)	ORCA
51	MG Mortuza	2023	A Computational Study on Selected Alkaloids as SARS‐CoV‐2 Inhibitors: PASS Prediction, Molecular Docking, ADMET Analysis, DFT, and Molecular Dynamics …	Biochemistry …	Q2	20	https://onlinelibrary.wiley.com/doi/abs/10.1155/2023/9975275	MG Mortuza, MAH Roni, A Kumer…	… molecular docking, molecular electrostatic potentials surface (MEPS), molecular dynamics simulation (MDS), and ADMET … The pharmacokinetics of a drug (also known as absorption, …	PBE0	6-31G(d,p)	ORCA
52	I Ali	2023	Computational exploration of novel ROCK2 inhibitors for cardiovascular disease management; insights from high-throughput virtual screening, molecular docking …	Plos one	Q1	20	https://journals.plos.org/plosone/article?id=10.1371/journal.pone.0294511	I Ali, MN Iqbal, M Ibrahim, IU Haq, WB Alonazi…	… A successful lead needs to be more druglike for successful drug discovery so top compounds were screened based on drug-likeness, ADME (Absorption, Distribution, Metabolism, and …	M06-2X	6-31G(d,p)	Gaussian 16
53	Z Zebbiche	2022	Preparation, DFT calculations, docking studies, antioxidant, and anticancer properties of new pyrazole and pyridine derivatives	… of Biochemical and …	Q2	19	https://onlinelibrary.wiley.com/doi/abs/10.1002/jbt.23135	Z Zebbiche, G Şekerci, H Boulebd…	… [ 39-44 ] In this study, we aimed to examine the antioxidant and anticancer properties of the … Inhibition of this enzyme is the primary mechanism of several anticancer agents. [ 59 ] With …	CAM-B3LYP	6-31G(d,p)	ORCA
54	Saloni	2022	A computational study of potential therapeutics for COVID-19 invoking conceptual density functional theory	Structural Chemistry	Q2	19	https://link.springer.com/article/10.1007/s11224-022-02048-1	Saloni, D Kumari, P Ranjan, T Chakraborty	… in terms of the computational quantum chemical method. … elucidated in terms of Conceptual Density Functional Theory (CDFT)-… to other antiviral drug officially approved for COVID-19 …	ωB97X-D	LANL2DZ	Gaussian 16
55	R Pal	2022	Quantitative structure–toxicity relationship in bioactive molecules from a conceptual DFT perspective	Pharmaceuticals	Q2	19	https://www.mdpi.com/1424-8247/15/11/1383	R Pal, SG Patra, PK Chattaraj	… Several global and local reactivity parameters are available within the purview of conceptual density functional theory (CDFT) that act as effective descriptors for predicting biological …	B3LYP	6-31G(d,p)	Gaussian 16
56	MM Kadhim	2023	Prediction of the corrosion inhibition efficiency and antibacterial activity of 1, 2, 4-oxadiazole derivatives using DFT and docking analysis: effect of alkoxy chain length	Journal of Adhesion Science …	Q1	18	https://www.tandfonline.com/doi/abs/10.1080/01694243.2022.2086398	MM Kadhim, IHR Tomi, AA Khadom	… have been designed theoretically and evaluated as corrosion inhibitors using density functional theory (DFT). The calculated theoretical inhibitory efficacy was correlated to quantum …	CAM-B3LYP	6-31G(d,p)	ORCA
57	YM Ahmed	2023	… , antibacterial, antioxidant activities, density functional theory, and molecular docking studies of new organic metal complexes and links to application of corrosion …	Applied …	Q2	17	https://onlinelibrary.wiley.com/doi/abs/10.1002/aoc.7015	YM Ahmed, AM Ashmawy, AA Abbas…	… density functional theory and characterization techniques. IR spectral data showed the mode of action … complexes demonstrated effective antimicrobial activity against Escherichia coli, …	B3LYP	6-31G(d,p)	ORCA
58	B Huwaimel	2025	A DFT investigation of the adsorption mechanism of paclitaxel on functionalized graphene oxide for enhanced drug delivery	Scientific Reports	Q1	16	https://www.nature.com/articles/s41598-025-99156-9	B Huwaimel, S Alqarni	… The negative PMF values in this range confirm the thermodynamic feasibility of PTX adsorption, highlighting the potential of functionalized rGO surfaces for efficient drug delivery …	B3LYP	6-31G(d,p)	GAMESS
59	K Tayade	2022	Exploration of molecular structure, dft calculations, and antioxidant activity of a hydrazone derivative	Antioxidants	Q2	16	https://www.mdpi.com/2076-3921/11/11/2138	K Tayade, GS Yeom, SK Sahoo, H Puschmann…	… activities including anticancer, antibacterial and anti-fungal, anticonvulsant, and antioxidant. … The antioxidants can delay or inhibit cellular damage related to oxidative stress by inhibiting …	B3LYP	6-31+G(d,p)	ORCA
60	DM Mamand	2022	Theoretical investigation on corrosion inhibition effect of oxadiazole: DFT calculations	Oxidation Communications	Q2	16	https://www.researchgate.net/profile/Hiwa-Qadr/publication/366929759_THEORETICAL_INVESTIGATION_ON_CORROSION_INHIBITION_EFFECT_OF_OXADIAZOLES_DFT_CALCULATIONS/links/649baad78de7ed28ba5cd63e/THEORETICAL-INVESTIGATION-ON-CORROSION-INHIBITION-EFFECT-OF-OXADIAZOLES-DFT-CALCULATIONS.pdf?origin=journalDetail&_tp=eyJwYWdlIjoiam91cm5hbERldGFpbCJ9	DM Mamand, TMK Anwer, HM Qadr	… Multidirectional biological action is characteristic of the structure11,12… corrosion inhibition efficiency of chemical compounds and drugs, such as electrochemical impedance spectroscopy…	B3LYP	LANL2DZ	Gaussian 09
61	N Flores-Holguín	2022	Conceptual DFT-Based Computational Peptidology, Pharmacokinetics Study and ADMET Report of the Veraguamides A–G Family of Marine Natural Drugs	Marine drugs	Q2	16	https://www.mdpi.com/1660-3397/20/2/97	N Flores-Holguín, J Ortega-Castro, J Frau…	… reactivity, pharmacokinetics and ADMET properties of … already presented integrated molecular modeling protocol has … the estimation of the conceptual density functional theory (CDFT) …	B3LYP	6-31G(d,p)	Gaussian 16
62	A Hossain	2021	Molecular docking, drug-likeness and ADMET analysis, application of density functional theory (DFT) and molecular dynamics (MD) simulation to the phytochemicals …	Current Computer-Aided Drug Design	Q2	15	https://www.benthamdirect.com/content/journals/cad/10.2174/1573409916999200730181611	A Hossain	… These 3 molecules showed good ADMET properties, which are crucial requirements in the drug discovery process. Their activity was checked by applying density functional theory (DFT…	B3LYP	6-31G(d,p)	Gaussian 16
63	M Elyashberg	2023	Enhancing efficiency of natural product structure revision: leveraging CASE and DFT over total synthesis	Molecules	Q2	14	https://www.mdpi.com/1420-3049/28/9/3796	M Elyashberg, S Tyagarajan, M Mandal, AV Buevich	… of natural products, we examined twelve real cases where structure revisions of natural products … could have been avoided if CASE and DFT had been applied. The originally proposed …	M06-2X	6-31G(d,p)	Gaussian 16
64	A Xing	2025	Synthesis, anticancer and antioxidant activities of novel heterocyclic phenolic hydrazone based derivatives: Investigation of DFT calculation, molecular docking and …	Journal of Molecular …	Q2	13	https://www.sciencedirect.com/science/article/pii/S0022286024020374	A Xing, P Zhu, B Zhang, J Lu, Y Zhang, D Zeng…	In this research, the anticancer and antioxidant activities of a novel class of heterocyclic phenolic hydrazone derivatives were investigated. The structure determination of the …	B3LYP	6-31G(d,p)	Gaussian 16
65	R Rahimi	2023	Covalent triazine-based monolayer with dual application in sensing and delivery of mercaptopurine anticancer drug: a periodic DFT study	Molecular Physics	Q2	13	https://www.tandfonline.com/doi/full/10.1080/00268976.2023.2231093	R Rahimi, M Solimannejad	… in the adsorption, delivery, and release of an anticancer drug for cancer … periodic DFT simulations have been used to study the utilisation of pristine CTF surfaces in drug delivery …	B3LYP	6-31G(d,p)	Q-Chem
66	S El Rhabori	2024	Design of new molecules against cervical cancer using DFT, theoretical spectroscopy, 2D/3D-QSAR, molecular docking, pharmacophore and ADMET investigations	Heliyon	Q2	13	https://www.cell.com/heliyon/fulltext/S2405-8440(24)00582-6	S El Rhabori, A El Aissouq, O Daoui, S Elkhattabi…	… been investigated using density functional theory (DFT) and MM2 … Molecular docking and pharmacophore modelling studies … Finally, the ADMET properties were investigated in order to …	B3LYP	6-31G(d,p)	Gaussian 16
67	DF Tegegn	2024	Investigation of substituent effects on the electronic structure and antiviral activity of favipiravir derivatives for Covid-19 treatment using DFT and molecular docking	Scientific Reports	Q1	12	https://www.nature.com/articles/s41598-024-68712-0	DF Tegegn, HZ Belachew, HF Etefa, AO Salau	… In this research, computations were performed using DFT and TDDFT 40 strategies applied … The B3LYP method with 6-311++G(d, p) level was utilized for the computations in the DFT/…	B3LYP	6-31G(d,p)	GAMESS
68	H Assad	2023	Density functional theory-based molecular modeling	… Simulations for Designing of …	Q2	11	https://www.sciencedirect.com/science/article/pii/B9780323951616000187	H Assad, A Thakur, AK Sharma, A Kumar	… In this regard, this book chapter elucidates DFT-based molecular modeling of corrosion inhibition properties of various inhibitors on different metals. Furthermore, special emphasis has …	M06-2X	6-31G(d,p)	ORCA
69	SB de Freitas Rodrigues	2023	Quantum chemistry in drug design: density function theory (DFT) and other quantum mechanics (QM)-related approaches	… -Aided Drug Design …	Q2	9	https://www.benthamdirect.com/content/books/9789815179934.chap8	SB de Freitas Rodrigues, RSA de Araújo…	… So, the observed low HOMO-LUMO energy gap is associated with high chemical reactivity and the existence of charge transfer throughout the molecule. The probability of degradation …	B3LYP	6-31G(d,p)	GAMESS
70	NK Chaudhary	2025	Synthesis, Corrosion Inhibition, In Silico ADME, DFT, and Antibacterial Activity of Pyridine‐Based Schiff Base and Its Cu (II) Complex	Applied …	Q2	7	https://onlinelibrary.wiley.com/doi/abs/10.1002/aoc.7884	NK Chaudhary, B Guragain…	… a 400-MHz Bruker Avance III spectrometer. … Density functional theory (DFT) is a valuable tool for exploring electronic properties and understanding biological activity, corrosion inhibition…	B3LYP-D3	cc-pVTZ	Gaussian 09
71	X Li	2024	Bioaccumulative chemicals are either too hard or too soft: Conceptual density functional theory as a screening tool for emerging pollutants	Environment International	Q2	6	https://www.sciencedirect.com/science/article/pii/S016041202300661X	X Li, JSM Anderson, KJ Jobst	… Conceptual density functional theory (CDFT) descriptors were computed to predict the environmental fate of approximately 6,000 widely used industrial chemicals. CDFT descriptors …	M06-2X	6-31G(d,p)	Gaussian 09
72	X Li	2024	High-Throughput Screening and Prediction of Nucleophilicity of Amines Using Machine Learning and DFT Calculations	Journal of Chemical …	Q2	6	https://pubs.acs.org/doi/abs/10.1021/acs.jcim.4c00724	X Li, H Zhong, H Yang, L Li, Q Wang	… as a benchmark for comparing machine learning (ML) predictions with density functional theory (DFT) calculations. The advantages of ML predictions over DFT calculations in terms of …	B3LYP	6-31G(d,p)	Gaussian 09
73	K Asokan	2025	Spectroscopic, DFT, In Silico, and Estimation of Biological Activity of 2, 4‐Dichloro‐6, 7‐Dimethoxyquinazoline as a Potential Anti‐Alzheimer's Disease Therapeutic …	… Quantum Chemistry	Q2	5	https://onlinelibrary.wiley.com/doi/abs/10.1002/qua.70006	K Asokan, S Sivaraman, K Nallasamy…	… the biological activity, specifically the anti-Alzheimer activity of DCDQ. … , but the DFT and in silico investigations provide valuable … with improved biological activity. The title compound has …	B3LYP	6-31G(d,p)	Gaussian 16
74	SSTH Shah	2025	In-silico Study of an Inhibitor of S-Adenosyl-L-Homocysteine Hydrolase (SAHH) of Naegleria fowleri using Molecular Docking, Density Functional Theory (DFT), and …	Molecular Biotechnology	Q2	4	https://link.springer.com/article/10.1007/s12033-025-01389-6	SSTH Shah, I Naeem, F Akram, MT Akhtar…	… Density Functional Theory Calculations Density functional theory (DFT) calculations were … The 6-31G basis set was employed with a hybrid functional of DFT, specifically the Lee–…	M06-2X	6-31+G(d,p)	ORCA
75	F Mollaamin	2024	Therapeutic role of medicinal plants against viral diseases focusing on COVID-19: Application of computational chemistry towards drug design	Revista Colombiana de …	Q2	4	https://search.proquest.com/openview/6583f55a02654d3c420c6665da4f71e2/1?pq-origsite=gscholar&cbl=2035763	F Mollaamin, S Shahriari…	… computed due to density functional theory (DFT) and m062x/… of these structures as natural antiviral medications. In fact, it … eficaz antiviral del receptor de la enfermedad del coronavirus…	M06-2X	6-31G(d,p)	Gaussian 16
76	P Ranjan	2022	Computational study of some potential inhibitors of COVID‐19: A DFT analysis	Quantitative Biology	Q2	3	https://onlinelibrary.wiley.com/doi/abs/10.15302/J-QB-022-0287	P Ranjan, K Gaurav, T Chakraborty	… Repurposed antiviral drugs have been stated to have potential value in … and quantum chemical study of natural bioflavonoid resveratrol and its analogy as a potential inhibitor for COVID-…	M06-2X	6-31G(d,p)	Gaussian 16
77	K Hossain	2025	Computational design and evaluation employed DFT, molecular docking, molecular dynamics, and ADMET analysis of salen-based drug candidates for potential …	In Silico …	Q2	2	https://link.springer.com/article/10.1007/s40203-025-00500-8	K Hossain, J Akter, MH Islam, T Fabiha, MM Hasan…	… ADMET predicts better pharmacokinetic properties, such as high human intestinal absorption (HIA) values for SL5 (0.97), SL6 (0.96), and SL7 (0.99), and minimum blood–brain barrier (…	M06-2X	6-311G(d,p)	ORCA
78	P Ranjan	2024	Computational insight of repurpose drug for treatment of COVID-19: a CDFT approach	Theoretical Chemistry Accounts	Q2	2	https://link.springer.com/article/10.1007/s00214-023-03082-w	P Ranjan, T Chakraborty	… Umifenovir (arbidol) is an antiviral drug and has been proven … In this work, physico-chemical properties of repurpose drugs … of COVID-19 are studied by using Density Functional Theory (…	B3LYP	6-31G(d,p)	Gaussian 16
79	SA Chowdhury	2021	DFT Based Pharmacokinetic, Molecular Docking, and ADMET Studies of Some Glucopyranoside Esters	J. Appl. Sci. Process Eng	Q2	1	https://publisher.unimas.my/ojs/index.php/JASPE/article/view/2940	SA Chowdhury, SM Kibria…	… protein or enzyme. In the current study we have chosen a quantum mechanical approach especially density functional theory (DFT) … In this study, we analyzed the ADMET properties of …	B3LYP	6-311G(d,p)	VASP
80	HS Mandour	2025	Exploring corrosion behavior, antimicrobial evaluation, molecular docking and DFT calculation of thiosemicarbazone ligand and its metal complexes	Scientific Reports	Q1	1	https://www.nature.com/articles/s41598-025-98580-1	HS Mandour, LA Khorshed, AM Abdou, B Ghazal	… (HL) as a novel corrosion inhibitor for copper metal in 1 M HCl … (PDP) and electrochemical impedance spectroscopy (EIS). The … surface and with the antibacterial activity; the theoretical …	B3LYP	6-31G(d,p)	VASP
81	SI Alzarea	2025	An integrative computational approach for identification of NLRP3 inhibitors through machine learning, docking, dynamics and DFT analysis	Scientific Reports	Q1	0	https://www.nature.com/articles/s41598-025-34068-2	SI Alzarea	… modification or high-throughput screening, which significantly raises the cost. Machine learning is becoming a valuable addition to traditional drug discovery approaches due to its …	ωB97X-D	6-31G(d,p)	VASP
