# Supplementary material
Source: Research Square preprint supplement (doi:10.21203/rs.3.rs-9151448/v1)
Supplement: Supplementary file 2 [file 08b6ccce05ba8082779547e8.xlsx]

## Sheet: Raw_Bibliographic_Data
Study_ID	First_Author	All_Authors	Year	Title	Journal	Quartile	Publication_Info	Citations	Abstract	URL	PDF_Links	Search_Source
S001	M Bitew	M Bitew, T Desalegn, TB Demissie, A Belayneh…	2021	Pharmacokinetics and drug-likeness of antidiabetic flavonoids: Molecular docking and DFT study	Plos one	Q1	M Bitew, T Desalegn, TB Demissie, A Belayneh… - Plos one, 2021 - journals.plos.org	217	… pharmacokinetic properties (ADME), … Density functional theory (DFT) calculations were also employed to calculate quantum chemical descriptors of the compounds. Molecular docking …	https://journals.plos.org/plosone/article?id=10.1371/journal.pone.0260853	[]	Google Scholar
S002	Q Bai	Q Bai, S Liu, Y Tian, T Xu…	2022	Application advances of deep learning methods for de novo drug design and molecular dynamics simulation	… Molecular Science	Q1	Q Bai, S Liu, Y Tian, T Xu… - … Molecular Science, 2022 - Wiley Online Library	166	… TensorMol methods show low cost and good accuracy for molecular simulation when compared with the density functional theory (DFT) method. The next example, Gaussian …	https://wires.onlinelibrary.wiley.com/doi/abs/10.1002/wcms.1581	[]	Web of Science
S003	O Noureddine	O Noureddine, N Issaoui, M Medimagh…	2021	Quantum chemical studies on molecular structure, AIM, ELF, RDG and antiviral activities of hybrid hydroxychloroquine in the treatment of COVID-19 …	Journal of King Saud …	Q2	O Noureddine, N Issaoui, M Medimagh… - Journal of King Saud …, 2021 - Elsevier	145	… antiviral activity. Where hydroxychloroquine derivatives showed an apparent efficacy against coronavirus … Optimized structures of these molecules have been reported by using DFT …	https://www.sciencedirect.com/science/article/pii/S1018364720304481	[]	Google Scholar
S004	TA Oliveira	TA Oliveira, MP Silva, EHB Maia, AM Silva…	2023	Virtual screening algorithms in drug discovery: a review focused on machine and deep learning methods	Drugs and Drug …	Q2	TA Oliveira, MP Silva, EHB Maia, AM Silva… - Drugs and Drug …, 2023 - mdpi.com	145	… step in the early stage of drug discovery due to it having been … focus on machine learning (ML) and deep learning (DL). … used, and how they contribute to the drug discovery process. …	https://www.mdpi.com/2813-2998/2/2/17	[]	Scopus
S005	O Noureddine	O Noureddine, N Issaoui, O Al-Dossary	2021	DFT and molecular docking study of chloroquine derivatives as antiviral to coronavirus COVID-19	Journal of King Saud University …	Q2	O Noureddine, N Issaoui, O Al-Dossary - Journal of King Saud University …, 2021 - Elsevier	132	… as potential antiviral for the treatment of COVID-19 diseases combining DFT and molecular … electrostatic potential were investigated using density functional theory (DFT) at the B3LYP/6…	https://www.sciencedirect.com/science/article/pii/S1018364720303621	[]	IEEE
S006	S Liu	S Liu	2022	Conceptual density functional theory: towards a new chemical reactivity theory	2022 - books.google.com	Q2	S Liu - 2022 - books.google.com	122	… reactivity descriptors. In the early 1950s, Fukui emphasized the predominant role of the frontier orbitals in (certain types of) reactions… in studying chemical reactions and reactivity. One of …	https://books.google.com/books?hl=en&lr=&id=38tqEAAAQBAJ&oi=fnd&pg=PT26&dq=conceptual+DFT+reactivity+descriptor+pharmaceutical&ots=_-NFFet6aw&sig=k83LN4kx4yWFzehbCxlBY2OcKO8	[]	Google Scholar
S007	M Anza	M Anza, M Endale, L Cardona, D Cortes…	2021	Antimicrobial activity, in silico molecular docking, ADMET and DFT analysis of secondary metabolites from roots of three Ethiopian medicinal plants	… and Chemistry	Q2	M Anza, M Endale, L Cardona, D Cortes… - … and Chemistry, 2021 - Taylor & Francis	95	… broad spectrum of biological activities. Clematis burgensis … antibacterial activity of dichloromethane crude extract and isolated compounds, in silico molecular docking, ADMET and …	https://www.tandfonline.com/doi/abs/10.2147/AABC.S323657	[]	Scopus
S008	KM Rana	KM Rana, J Maowa, A Alam, S Dey, A Hosen…	2021	In silico DFT study, molecular docking, and ADMET predictions of cytidine analogs with antimicrobial and anticancer properties	In silico …	Q2	KM Rana, J Maowa, A Alam, S Dey, A Hosen… - In silico …, 2021 - Springer	82	… Computational chemistry is a popular approach to calculate the physicochemical, spectral, … As a result of screening modified cytidine analogs for potential antimicrobial activity, we have …	https://link.springer.com/article/10.1007/s40203-021-00102-0	[]	PubMed
S009	A Kasprzhitskii	A Kasprzhitskii, G Lazorenko	2021	Corrosion inhibition properties of small peptides: DFT and Monte Carlo simulation studies	Journal of Molecular Liquids	Q2	A Kasprzhitskii, G Lazorenko - Journal of Molecular Liquids, 2021 - Elsevier	79	Using the computational methods of Density Functional Theory (DFT) and Monte Carlo (MC), we investigated the potential and mechanism of corrosion inhibition of iron, copper and …	https://www.sciencedirect.com/science/article/pii/S0167732221005079	[]	Scopus
S010	S Kaya	S Kaya, A Thakur, A Kumar	2023	The role of in Silico/DFT investigations in analyzing dye molecules for enhanced solar cell efficiency and reduced toxicity	Journal of Molecular Graphics and Modelling	Q2	S Kaya, A Thakur, A Kumar - Journal of Molecular Graphics and Modelling, 2023 - Elsevier	75	… methods such as Conceptual density functional theory (CDFT) … In silico studies have been used to screen and design non-… limitations of CDFT and in silico studies and their potential …	https://www.sciencedirect.com/science/article/pii/S1093326323001341	[]	IEEE
S011	M Aziz	M Aziz, SA Ejaz, S Zargar, N Akhtar, AT Aborode…	2022	Deep learning and structure-based virtual screening for drug discovery against NEK7: a novel target for the treatment of cancer	Molecules	Q2	M Aziz, SA Ejaz, S Zargar, N Akhtar, AT Aborode… - Molecules, 2022 - mdpi.com	72	… Deep learning (DP) models were used to predict drug target … from DFT studies revealed the reactive nature of the compounds. Moreover, the current study has utilized deep learning …	https://www.mdpi.com/1420-3049/27/13/4098	[]	Scopus
S012	FE Abeng	FE Abeng, VC Anadebe	2023	Combined electrochemical, DFT/MD-simulation and hybrid machine learning based on ANN-ANFIS models for prediction of doxorubicin drug as corrosion inhibitor for …	Computational and Theoretical Chemistry	Q2	FE Abeng, VC Anadebe - Computational and Theoretical Chemistry, 2023 - Elsevier	69	… In this work, Doxorubicin drug was used as mild … DFT/ molecular dynamic simulation (MDS), Scanning electron microscopic (SEM), were used for proper evaluation of Doxorubicin drug …	https://www.sciencedirect.com/science/article/pii/S2210271X2300316X	[]	Web of Science
S013	N Flores-Holguín	N Flores-Holguín, J Frau, D Glossman-Mitnik	2021	In silico pharmacokinetics, ADMET study and conceptual DFT analysis of two plant cyclopeptides isolated from rosaceae as a computational Peptidology approach	Frontiers in Chemistry	Q2	N Flores-Holguín, J Frau, D Glossman-Mitnik - Frontiers in Chemistry, 2021 - frontiersin.org	69	… In this research, some ADME parameters were estimated with the aid of Chemicalize and the online available SwissADME software (Daina et al., 2017).Additional information about the …	https://www.frontiersin.org/journals/chemistry/articles/10.3389/fchem.2021.708364/full	[]	IEEE
S014	YT Hussein	YT Hussein, YH Azeez	2023	DFT analysis and in silico exploration of drug-likeness, toxicity prediction, bioactivity score, and chemical reactivity properties of the urolithins	Journal of Biomolecular Structure and …	Q2	YT Hussein, YH Azeez - Journal of Biomolecular Structure and …, 2023 - Taylor & Francis	62	… main quantum chemical descriptors for the assessment and evaluating biological activity. … In this work, the drug likeness, toxicity, biological activity, and chemical reactivity descriptors …	https://www.tandfonline.com/doi/abs/10.1080/07391102.2021.2017350	[]	PubMed
S015	M Canakdag	M Canakdag, M Feizi-Dehnayebi, S Kundu…	2025	Comprehensive evaluation of purine analogues: Cytotoxic and antioxidant activities, enzyme inhibition, DFT insights, and molecular docking analysis	Journal of Molecular …	Q2	M Canakdag, M Feizi-Dehnayebi, S Kundu… - Journal of Molecular …, 2025 - Elsevier	61	… antioxidant, cytotoxic activity, and enzyme inhibition, alongside in-depth computational assessments using density functional theory (DFT) and … , and subjected to antioxidant assays to …	https://www.sciencedirect.com/science/article/pii/S0022286024033064	[]	Web of Science
S016	T Erdogan	T Erdogan	2021	DFT, molecular docking and molecular dynamics simulation studies on some newly introduced natural products for their potential use against SARS-CoV-2	Journal of molecular structure	Q2	T Erdogan - Journal of molecular structure, 2021 - Elsevier	60	… After DFT calculations, geometry optimized structures were subjected to molecular docking … In the next part of the study, molecular dynamics (MD) simulations were performed on the …	https://www.sciencedirect.com/science/article/pii/S0022286021008668	[]	Scopus
S017	S Lakhera	S Lakhera, K Devlal, A Ghosh, P Chowdhury, M Rana	2022	Modelling the DFT structural and reactivity study of feverfew and evaluation of its potential antiviral activity against COVID-19 using molecular docking and MD …	Chemical Papers	Q2	S Lakhera, K Devlal, A Ghosh, P Chowdhury, M Rana - Chemical Papers, 2022 - Springer	57	… In the present work, we have studied the antiviral behavior of feverfew plant in treating COVID-19. We have reported a systematic in silico study with the antiviral effects of various …	https://link.springer.com/article/10.1007/s11696-022-02067-6	[]	IEEE
S018	C Duan	C Duan, F Liu, A Nandy, HJ Kulik	2021	Putting density functional theory to the test in machine-learning-accelerated materials discovery	The Journal of Physical …	Q2	C Duan, F Liu, A Nandy, HJ Kulik - The Journal of Physical …, 2021 - ACS Publications	56	… known a priori how the discovery process will be influenced by the choice of method. Here, approximate DFT is applied nearly exclusively, and DFT functionals that perform well for one …	https://pubs.acs.org/doi/abs/10.1021/acs.jpclett.1c00631	[]	PubMed
S019	R Rahimi	R Rahimi, M Solimannejad	2022	B3O3 monolayer with dual application in sensing of COVID-19 biomarkers and drug delivery for treatment purposes: A periodic DFT study	Journal of Molecular Liquids	Q2	R Rahimi, M Solimannejad - Journal of Molecular Liquids, 2022 - Elsevier	53	… , this nanosheet can also deliver a Baricitinib drug to the target … drug indicates that adsorptions of the drug over B 3 O 3 nanosheet are energetically favorable with energy adsorption in …	https://www.sciencedirect.com/science/article/pii/S0167732222003932	[]	Web of Science
S020	S Akkoc	S Akkoc, H Karatas, MT Muhammed…	2023	Drug design of new therapeutic agents: Molecular docking, molecular dynamics simulation, DFT and POM analyses of new Schiff base ligands and impact of …	… and Dynamics	Q2	S Akkoc, H Karatas, MT Muhammed… - … and Dynamics, 2023 - Taylor & Francis	53	… Computer-aided drug design (CADD) methods have been applied in drug … Hence, molecular docking, molecular dynamics (MD) simulation, density functional theory (DFT) calculations …	https://www.tandfonline.com/doi/abs/10.1080/07391102.2022.2111360	[]	PubMed
S021	SMA Kawsar	SMA Kawsar, NS Munia, S Saha…	2024	In Silico Pharmacokinetics, Molecular Docking and Molecular Dynamics Simulation Studies of Nucleoside Analogs for Drug Discovery- A Mini Review	Mini Reviews in …	Q2	SMA Kawsar, NS Munia, S Saha… - Mini Reviews in …, 2024 - benthamdirect.com	53	… used in drug discovery and development to provide … , frontier molecular orbital behavior, and molecular electrostatic properties [… Density functional theory (DFT) is a quantum mechanical …	https://www.benthamdirect.com/content/journals/mrmc/10.2174/0113895575258033231024073521	[]	Scopus
S022	M Sankarganesh	M Sankarganesh, R Vijay Solomon…	2021	… with pyrimidine- and morpholine-based ligand: synthesis, spectroscopic, DFT, TDDFT, catalytic reduction, in vitro anticancer, antioxidant, antimicrobial, DNA binding …	Journal of …	Q2	M Sankarganesh, R Vijay Solomon… - Journal of …, 2021 - Taylor & Francis	51	… Density functional theory (DFT) calculations combined with … have been optimized using DFT calculations. To understand the … The percentage growth inhibition was determined using the …	https://www.tandfonline.com/doi/abs/10.1080/07391102.2020.1727364	[]	PubMed
S023	P Geerlings	P Geerlings	2022	From density functional theory to conceptual density functional theory and biosystems	Pharmaceuticals	Q2	P Geerlings - Pharmaceuticals, 2022 - mdpi.com	48	… reactivity of the reactant molecule 1 and can be considered as reactivity indicators/descriptors … With increasing order, the direct use of these reactivity descriptors is expected to be …	https://www.mdpi.com/1424-8247/15/9/1112	[]	Google Scholar
S024	S Bharadwaj	S Bharadwaj, AK Rao, VD Dwivedi…	2021	Structure-based screening and validation of bioactive compounds as Zika virus methyltransferase (MTase) inhibitors through first-principle density functional theory …	Journal of …	Q2	S Bharadwaj, AK Rao, VD Dwivedi… - Journal of …, 2021 - Taylor & Francis	43	… Recently structure-based virtual screening has been employed in the discovery of lead drug … In this study, following 10% sequential virtual screening of HTVS and SP, XP screening …	https://www.tandfonline.com/doi/abs/10.1080/07391102.2020.1747545	[]	Web of Science
S025	S Sukumaran	S Sukumaran, A Zochedh, K Chandran…	2024	… of FDA approved drug gemcitabine and docetaxel for enhanced anti‐breast cancer activity: DFT, docking, molecular dynamics simulation and pharmacophore studies	… Journal of Quantum …	Q2	S Sukumaran, A Zochedh, K Chandran… - … Journal of Quantum …, 2024 - Wiley Online Library	43	… for virtual screening [26]. The use of molecular docking simulation in structure-based drug design … Molecular dynamic simulation is helpful in understanding the stability of the GEDT with …	https://onlinelibrary.wiley.com/doi/abs/10.1002/qua.27359	[]	PubMed
S026	RBO Ouma	RBO Ouma, SM Ngari, JK Kibet	2024	A review of the current trends in computational approaches in drug design and metabolism	Discover Public Health	Q2	RBO Ouma, SM Ngari, JK Kibet - Discover Public Health, 2024 - Springer	41	… Computational tools and methods for drug design and development such as molecular … mechanics (QM/MM), and Density functional theory (DFT) have been reviewed. Accordingly, the …	https://link.springer.com/article/10.1186/s12982-024-00229-3	[]	Scopus
S027	C Sandoval-Pauker	C Sandoval-Pauker, S Yin, A Castillo…	2023	Computational chemistry as applied in environmental research: opportunities and challenges	ACS ES&T …	Q2	C Sandoval-Pauker, S Yin, A Castillo… - ACS ES&T …, 2023 - ACS Publications	40	… chemistry techniques in areas of environmental chemistry … Time-dependent density functional theory (TD-DFT) is an … study of the toxic effects of chemicals using QSAR include the …	https://pubs.acs.org/doi/abs/10.1021/acsestengg.3c00227	[]	Scopus
S028	S Ahmed	S Ahmed, N Islam, M Shahinozzaman…	2021	Virtual screening, molecular dynamics, density functional theory and quantitative structure activity relationship studies to design peroxisome proliferator-activated …	Journal of …	Q2	S Ahmed, N Islam, M Shahinozzaman… - Journal of …, 2021 - Taylor & Francis	39	Full article: Virtual screening, molecular dynamics, density functional theory and quantitative structure activity relationship studies to design peroxisome proliferator-activated receptor-γ …	https://www.tandfonline.com/doi/abs/10.1080/07391102.2020.1714482	[]	PubMed
S029	S El-Kalyoubi	S El-Kalyoubi, F Agili, WA Zordok…	2021	Synthesis, in silico prediction and in vitro evaluation of antimicrobial activity, dft calculation and theoretical investigation of novel xanthines and uracil containing …	International Journal of …	Q2	S El-Kalyoubi, F Agili, WA Zordok… - International Journal of …, 2021 - mdpi.com	39	… quantum chemical parameters depending upon the energy values of HOMO and LUMO were calculated as global softness (S), electro negativity (χ), absolute softness (σ), chemical …	https://www.mdpi.com/1422-0067/22/20/10979	[]	Scopus
S030	L Feng	L Feng, W Song, N Oturan, M Karbasi…	2023	… Naproxen in aqueous matrices: Elucidating the intermediates' eco-toxicity, by assessing its degradation pathways via experimental and density functional theory (DFT …	Chemical Engineering …	Q2	L Feng, W Song, N Oturan, M Karbasi… - Chemical Engineering …, 2023 - Elsevier	39	… via LC, while density functional theory (DFT) was applied to … The formation of toxic intermediates with higher toxicity than … solution toxicity indicated that the formed toxic …	https://www.sciencedirect.com/science/article/pii/S1385894722039651	[]	IEEE
S031	AM Abuelela	AM Abuelela, J Kaur, A Saxena, MA Bedair…	2023	Electrochemical and DFT studies of Terminalia bellerica fruit extract as an eco-friendly inhibitor for the corrosion of steel	Scientific reports	Q1	AM Abuelela, J Kaur, A Saxena, MA Bedair… - Scientific reports, 2023 - nature.com	38	… The corrosion prevention activity was studied on the steel in 1 MH 2 SO 4 using a variety of … ), electrochemical impedance spectroscopy (EIS), density functional theory (DFT), natural …	https://www.nature.com/articles/s41598-023-45283-0	[]	IEEE
S032	M Alam	M Alam, MN Abser, A Kumer, MMH Bhuiyan, P Akter…	2023	… , characterization, antibacterial activity of thiosemicarbazones derivatives and their computational approaches: Quantum calculation, molecular docking …	Heliyon	Q2	M Alam, MN Abser, A Kumer, MMH Bhuiyan, P Akter… - Heliyon, 2023 - cell.com	38	… in silico study [11,12], where the Density Functional Theory (… that locates out in computational chemistry is to categorize … These all molecules are optimized through the DFT functional …	https://www.cell.com/heliyon/fulltext/S2405-8440(23)03429-1?uuid=uuid%3A34fc8485-d0c4-4363-8930-be24ed4d2ef9	[]	IEEE
S033	MA Bedair	MA Bedair, HM Elaryian, ES Gad, M Alshareef…	2023	… adsorption and corrosion inhibition properties of newly synthesized diazinyl derivatives for mild steel in hydrochloric acid: synthesis, electrochemical, SRB biological …	RSC …	Q2	MA Bedair, HM Elaryian, ES Gad, M Alshareef… - RSC …, 2023 - pubs.rsc.org	37	… plasma-optical emission spectroscopy were used to verify the … Density functional theory (DFT) has become a helpful strategy … compounds TODB and DODB have good biological activity …	https://pubs.rsc.org/en/content/articlehtml/2023/ra/d2ra06574f	[]	Google Scholar
S034	S Karoui	S Karoui, O Khaoua, N Benbellat, S Antonczak…	2024	Molecular Docking, Molecular Dynamics, PKCSM Drug‐Likeness Profiles, Toxicity, and DFT study of the antioxidant and anticancer activities of three flavonoid …	…	Q2	S Karoui, O Khaoua, N Benbellat, S Antonczak… - …, 2024 - Wiley Online Library	37	… As enzyme inhibitors, Isoquercitin shows strong activity with a score of 0.42, while Ophioglonol and Quercetin exhibit moderate to strong activity with scores of 0.33 and 0.28, respectively…	https://chemistry-europe.onlinelibrary.wiley.com/doi/abs/10.1002/slct.202401776	[]	PubMed
S035	MG Golafshani	MG Golafshani, H Tavakoli, SA Hosseini…	2023	MD and DFT computational simulations of Caffeoylquinic derivatives as a bio-corrosion inhibitor from quince extract with experimental investigation of corrosion …	Journal of Molecular …	Q2	MG Golafshani, H Tavakoli, SA Hosseini… - Journal of Molecular …, 2023 - Elsevier	36	… spectroscopy confirmed that the extract contains nitrogen atoms, oxygen atoms, and aromatic rings that are known to have corrosion inhibition … (MD), density functional theory (DFT), and …	https://www.sciencedirect.com/science/article/pii/S0022286022023468	[]	Google Scholar
S036	SS Mishra	SS Mishra, S Ranjan, CS Sharma…	2021	… investigation of potential inhibitors of novel coronavirus 2019 through structure-based virtual screening, molecular dynamics and density functional theory studies	Journal of …	Q2	SS Mishra, S Ranjan, CS Sharma… - Journal of …, 2021 - Taylor & Francis	36	Full article: Computational investigation of potential inhibitors of novel coronavirus 2019 through structure-based virtual screening, molecular dynamics and density functional theory …	https://www.tandfonline.com/doi/abs/10.1080/07391102.2020.1791957	[]	Scopus
S037	A IŞIK	A IŞIK, U Acar Çevik, I Çelik…	2022	Benzimidazole-hydrazone derivatives: Synthesis, in vitro anticancer, antimicrobial, antioxidant activities, in silico DFT and ADMET studies	Journal of …	Q2	A IŞIK, U Acar Çevik, I Çelik… - Journal of …, 2022 - avesis.cumhuriyet.edu.tr	35	… , antifungal, anticancer, and antioxidant activities. Density Functional Theory (DFT) is a use… derivatives and their transition metal complexes as topoisomerease II inhibitors, Eur. J. Med. …	https://avesis.cumhuriyet.edu.tr/yayin/73ccb0df-5592-439b-8917-81b0ca285ade/benzimidazole-hydrazone-derivatives-synthesis-in-vitro-anticancer-antimicrobial-antioxidant-activities-in-silico-dft-and-admet-studies	[]	Google Scholar
S038	MI Khan	MI Khan, I Nadeem, A Majid, M Shakil	2021	Adsorption mechanism of Palbociclib anticancer drug on two different functionalized nanotubes as a drug delivery vehicle: A first principle's study	Applied Surface Science	Q1	MI Khan, I Nadeem, A Majid, M Shakil - Applied Surface Science, 2021 - Elsevier	33	… adsorption prospects of PLB drug on the functionalized nanotubes are investigated in detail. The structural parameters and adsorption characteristics indicate that drug release is … drug …	https://www.sciencedirect.com/science/article/pii/S0169433221002051	[]	Scopus
S039	YK Lee	YK Lee	2021	Density functional theory (DFT) calculations and catalysis	Catalysts	Q2	YK Lee - Catalysts, 2021 - mdpi.com	32	… Theoretical studies are suitable for studying chemical reactivity and modeling complex catalytic reaction pathways. Density functional theory (DFT) … and theory obtained from DFT-based …	https://www.mdpi.com/2073-4344/11/4/454	[]	Scopus
S040	MAA Ibrahim	MAA Ibrahim, MHA Hamad, AHM Mahmoud…	2023	Adsorption of Favipiravir on pristine graphene nanosheets as a drug delivery system: A DFT study	RSC …	Q2	MAA Ibrahim, MHA Hamad, AHM Mahmoud… - RSC …, 2023 - pubs.rsc.org	31	… was corrected using the Grimme (DFT-D2) method. … periodic cells in the z-direction, a vacuum with a thickness of 20 Å was created along the vertical direction of the GN surface …	https://pubs.rsc.org/en/content/articlehtml/2023/ra/d3ra03227b	[]	Web of Science
S041	L El Ghayati	L El Ghayati, Y Sert, NK Sebbar, Y Ramli…	2021	… , spectroscopic characterizations, Hirshfeld surface analyses, molecular docking studies, DFT calculations, corrosion inhibition anticipation, and antibacterial activities	Journal of …	Q2	L El Ghayati, Y Sert, NK Sebbar, Y Ramli… - Journal of …, 2021 - Wiley Online Library	29	… Their structures were clarified on the basis of spectral data and confirmed by single-crystal X… They are also characterized using DFT to compute and predict the corresponding spectral …	https://onlinelibrary.wiley.com/doi/abs/10.1002/jhet.4167	[]	IEEE
S042	EA Eno	EA Eno, H Louis, TO Unimuke, TE Gber…	2022	Modeling of Re (I) tricarbonyl complexes against SARS-CoV-2 receptor via DFT, in-silico molecular docking, and QSAR	Chemical Physics …	Q2	EA Eno, H Louis, TO Unimuke, TE Gber… - Chemical Physics …, 2022 - Elsevier	29	… DFT studies, in silico molecular docking, and multilinear regression analysis (MLRA) investigations of eight (8) selected biologically active … The atomistic DFT modeling was conducted …	https://www.sciencedirect.com/science/article/pii/S2667022422000433	[]	Scopus
S043	I Ahmad	I Ahmad, V Jagatap, H Patel	2023	Application of density functional theory (DFT) and response surface methodology (RSM) in drug discovery	…	Q2	I Ahmad, V Jagatap, H Patel - … , computational tools and databases in drug …, 2023 - Elsevier	27	… Density functional theory (DFT) is the most extensively used and renowned quantum theory … The current chapter discusses the potential uses of DFT in drug designing of the …	https://www.sciencedirect.com/science/article/pii/B9780323905930000046	[]	Web of Science
S044	L Golea	L Golea, R Chebaki, M Laabassi, P Mosset	2023	Synthesis, characterization of some substituted Quinolines derivatives: DFT, computational, in silico ADME, molecular docking and biological activities	Chemical Data Collections	Q2	L Golea, R Chebaki, M Laabassi, P Mosset - Chemical Data Collections, 2023 - Elsevier	24	… compounds were evaluated for antibacterial activity against one Gram-positive bacteria, and two Gram-negative bacteria. The result showed moderate antimicrobial activities. Also, …	https://www.sciencedirect.com/science/article/pii/S2405830022001495	[]	IEEE
S045	J Kashyap	J Kashyap, D Datta	2022	Drug repurposing for SARS-CoV-2: a high-throughput molecular docking, molecular dynamics, machine learning, and DFT study	Journal of materials science	Q1	J Kashyap, D Datta - Journal of materials science, 2022 - Springer	24	… This accounts for the efficacy of the drug discovery pipeline chosen in this work. Furthermore, in multiple cases, the same drug demonstrated good binding potential to various proteins …	https://link.springer.com/article/10.1007/s10853-022-07195-8	[]	Scopus
S046	V Andonova	V Andonova, K Nikolova, I Iliev, S Georgieva…	2024	Spectral Characteristics, In Silico Perspectives, Density Functional Theory (DFT), and Therapeutic Potential of Green-Extracted Phycocyanin from Spirulina	International Journal of …	Q2	V Andonova, K Nikolova, I Iliev, S Georgieva… - International Journal of …, 2024 - mdpi.com	23	… This study also involves an in silico assessment of the diverse applications of green pigment … Based on the in silico analysis, PC holds promise for various applications due to its safety, …	https://www.mdpi.com/1422-0067/25/17/9170	[]	Scopus
S047	A Shah	A Shah, A Choudhary, M Jain, S Perumal, V Patel…	2024	Discovery of novel anticancer flavonoids as potential HDAC2 inhibitors: virtual screening approach based on molecular docking, DFT and molecular dynamics …	3 Biotech	Q2	A Shah, A Choudhary, M Jain, S Perumal, V Patel… - 3 Biotech, 2024 - Springer	22	… The ADMET profiles of these compounds are extremely important for drug development. … of a molecular dynamic simulation of a protein–ligand docked complex. Molecular dynamics …	https://link.springer.com/article/10.1007/s13205-023-03912-5	[]	Google Scholar
S048	BK Chagaleti	BK Chagaleti, V Saravanan, MK Kathiravan	2024	… inhibitors for cancer treatment: integrating ligand-based pharmacophore modelling, molecular docking, DFT, ADMET, and molecular dynamics simulation studies	Beni-Suef University Journal …	Q2	BK Chagaleti, V Saravanan, MK Kathiravan - Beni-Suef University Journal …, 2024 - Springer	22	… balances favourable pharmacokinetic characteristics with … ADME online predictor to assess the ADME properties of small compounds, and Molinspiration to review the pharmacokinetic …	https://link.springer.com/article/10.1186/s43088-024-00577-8	[]	Google Scholar
S049	S Esfahani	S Esfahani, J Akbari…	2024	Adsorption of ibuprofen by an iron-doped silicon carbide graphene monolayer: DFT exploration of drug delivery insights	International Journal of …	Q2	S Esfahani, J Akbari… - International Journal of …, 2024 - oiccpress.com	21	… for exploring insights into the drug delivery of ibuprofen (IBU) by … Indeed, the availability of a suitable surface area made the … delivery of mercaptopurine anticancer drug: A periodic DFT …	http://oiccpress.com/ijnd/article/view/4404	[]	IEEE
S050	A Bag	A Bag	2021	DFT based Computational Methodology of IC50 Prediction	Current computer-aided drug design	Q2	A Bag - Current computer-aided drug design, 2021 - benthamdirect.com	20	… For the computation of the electric dipole moments and reactivity descriptors (ω) of the test … use any advanced quantum computation method like density functional theory (DFT) [27, 28], …	https://www.benthamdirect.com/content/journals/cad/10.2174/1573409916666200219115112	[]	Scopus
S051	MG Mortuza	MG Mortuza, MAH Roni, A Kumer…	2023	A Computational Study on Selected Alkaloids as SARS‐CoV‐2 Inhibitors: PASS Prediction, Molecular Docking, ADMET Analysis, DFT, and Molecular Dynamics …	Biochemistry …	Q2	MG Mortuza, MAH Roni, A Kumer… - Biochemistry …, 2023 - Wiley Online Library	20	… molecular docking, molecular electrostatic potentials surface (MEPS), molecular dynamics simulation (MDS), and ADMET … The pharmacokinetics of a drug (also known as absorption, …	https://onlinelibrary.wiley.com/doi/abs/10.1155/2023/9975275	[]	PubMed
S052	I Ali	I Ali, MN Iqbal, M Ibrahim, IU Haq, WB Alonazi…	2023	Computational exploration of novel ROCK2 inhibitors for cardiovascular disease management; insights from high-throughput virtual screening, molecular docking …	Plos one	Q1	I Ali, MN Iqbal, M Ibrahim, IU Haq, WB Alonazi… - Plos one, 2023 - journals.plos.org	20	… A successful lead needs to be more druglike for successful drug discovery so top compounds were screened based on drug-likeness, ADME (Absorption, Distribution, Metabolism, and …	https://journals.plos.org/plosone/article?id=10.1371/journal.pone.0294511	[]	Google Scholar
S053	Z Zebbiche	Z Zebbiche, G Şekerci, H Boulebd…	2022	Preparation, DFT calculations, docking studies, antioxidant, and anticancer properties of new pyrazole and pyridine derivatives	… of Biochemical and …	Q2	Z Zebbiche, G Şekerci, H Boulebd… - … of Biochemical and …, 2022 - Wiley Online Library	19	… [ 39-44 ] In this study, we aimed to examine the antioxidant and anticancer properties of the … Inhibition of this enzyme is the primary mechanism of several anticancer agents. [ 59 ] With …	https://onlinelibrary.wiley.com/doi/abs/10.1002/jbt.23135	[]	IEEE
S054	Saloni	Saloni, D Kumari, P Ranjan, T Chakraborty	2022	A computational study of potential therapeutics for COVID-19 invoking conceptual density functional theory	Structural Chemistry	Q2	Saloni, D Kumari, P Ranjan, T Chakraborty - Structural Chemistry, 2022 - Springer	19	… in terms of the computational quantum chemical method. … elucidated in terms of Conceptual Density Functional Theory (CDFT)-… to other antiviral drug officially approved for COVID-19 …	https://link.springer.com/article/10.1007/s11224-022-02048-1	[]	Scopus
S055	R Pal	R Pal, SG Patra, PK Chattaraj	2022	Quantitative structure–toxicity relationship in bioactive molecules from a conceptual DFT perspective	Pharmaceuticals	Q2	R Pal, SG Patra, PK Chattaraj - Pharmaceuticals, 2022 - mdpi.com	19	… Several global and local reactivity parameters are available within the purview of conceptual density functional theory (CDFT) that act as effective descriptors for predicting biological …	https://www.mdpi.com/1424-8247/15/11/1383	[]	Scopus
S056	MM Kadhim	MM Kadhim, IHR Tomi, AA Khadom	2023	Prediction of the corrosion inhibition efficiency and antibacterial activity of 1, 2, 4-oxadiazole derivatives using DFT and docking analysis: effect of alkoxy chain length	Journal of Adhesion Science …	Q1	MM Kadhim, IHR Tomi, AA Khadom - Journal of Adhesion Science …, 2023 - Taylor & Francis	18	… have been designed theoretically and evaluated as corrosion inhibitors using density functional theory (DFT). The calculated theoretical inhibitory efficacy was correlated to quantum …	https://www.tandfonline.com/doi/abs/10.1080/01694243.2022.2086398	[]	PubMed
S057	YM Ahmed	YM Ahmed, AM Ashmawy, AA Abbas…	2023	… , antibacterial, antioxidant activities, density functional theory, and molecular docking studies of new organic metal complexes and links to application of corrosion …	Applied …	Q2	YM Ahmed, AM Ashmawy, AA Abbas… - Applied …, 2023 - Wiley Online Library	17	… density functional theory and characterization techniques. IR spectral data showed the mode of action … complexes demonstrated effective antimicrobial activity against Escherichia coli, …	https://onlinelibrary.wiley.com/doi/abs/10.1002/aoc.7015	[]	IEEE
S058	B Huwaimel	B Huwaimel, S Alqarni	2025	A DFT investigation of the adsorption mechanism of paclitaxel on functionalized graphene oxide for enhanced drug delivery	Scientific Reports	Q1	B Huwaimel, S Alqarni - Scientific Reports, 2025 - nature.com	16	… The negative PMF values in this range confirm the thermodynamic feasibility of PTX adsorption, highlighting the potential of functionalized rGO surfaces for efficient drug delivery …	https://www.nature.com/articles/s41598-025-99156-9	[]	Scopus
S059	K Tayade	K Tayade, GS Yeom, SK Sahoo, H Puschmann…	2022	Exploration of molecular structure, dft calculations, and antioxidant activity of a hydrazone derivative	Antioxidants	Q2	K Tayade, GS Yeom, SK Sahoo, H Puschmann… - Antioxidants, 2022 - mdpi.com	16	… activities including anticancer, antibacterial and anti-fungal, anticonvulsant, and antioxidant. … The antioxidants can delay or inhibit cellular damage related to oxidative stress by inhibiting …	https://www.mdpi.com/2076-3921/11/11/2138	[]	Google Scholar
S060	DM Mamand	DM Mamand, TMK Anwer, HM Qadr	2022	Theoretical investigation on corrosion inhibition effect of oxadiazole: DFT calculations	Oxidation Communications	Q2	DM Mamand, TMK Anwer, HM Qadr - Oxidation Communications, 2022 - researchgate.net	16	… Multidirectional biological action is characteristic of the structure11,12… corrosion inhibition efficiency of chemical compounds and drugs, such as electrochemical impedance spectroscopy…	https://www.researchgate.net/profile/Hiwa-Qadr/publication/366929759_THEORETICAL_INVESTIGATION_ON_CORROSION_INHIBITION_EFFECT_OF_OXADIAZOLES_DFT_CALCULATIONS/links/649baad78de7ed28ba5cd63e/THEORETICAL-INVESTIGATION-ON-CORROSION-INHIBITION-EFFECT-OF-OXADIAZOLES-DFT-CALCULATIONS.pdf?origin=journalDetail&_tp=eyJwYWdlIjoiam91cm5hbERldGFpbCJ9	[]	PubMed
S061	N Flores-Holguín	N Flores-Holguín, J Ortega-Castro, J Frau…	2022	Conceptual DFT-Based Computational Peptidology, Pharmacokinetics Study and ADMET Report of the Veraguamides A–G Family of Marine Natural Drugs	Marine drugs	Q2	N Flores-Holguín, J Ortega-Castro, J Frau… - Marine drugs, 2022 - mdpi.com	16	… reactivity, pharmacokinetics and ADMET properties of … already presented integrated molecular modeling protocol has … the estimation of the conceptual density functional theory (CDFT) …	https://www.mdpi.com/1660-3397/20/2/97	[]	IEEE
S062	A Hossain	A Hossain	2021	Molecular docking, drug-likeness and ADMET analysis, application of density functional theory (DFT) and molecular dynamics (MD) simulation to the phytochemicals …	Current Computer-Aided Drug Design	Q2	A Hossain - Current Computer-Aided Drug Design, 2021 - benthamdirect.com	15	… These 3 molecules showed good ADMET properties, which are crucial requirements in the drug discovery process. Their activity was checked by applying density functional theory (DFT…	https://www.benthamdirect.com/content/journals/cad/10.2174/1573409916999200730181611	[]	PubMed
S063	M Elyashberg	M Elyashberg, S Tyagarajan, M Mandal, AV Buevich	2023	Enhancing efficiency of natural product structure revision: leveraging CASE and DFT over total synthesis	Molecules	Q2	M Elyashberg, S Tyagarajan, M Mandal, AV Buevich - Molecules, 2023 - mdpi.com	14	… of natural products, we examined twelve real cases where structure revisions of natural products … could have been avoided if CASE and DFT had been applied. The originally proposed …	https://www.mdpi.com/1420-3049/28/9/3796	[]	Google Scholar
S064	A Xing	A Xing, P Zhu, B Zhang, J Lu, Y Zhang, D Zeng…	2025	Synthesis, anticancer and antioxidant activities of novel heterocyclic phenolic hydrazone based derivatives: Investigation of DFT calculation, molecular docking and …	Journal of Molecular …	Q2	A Xing, P Zhu, B Zhang, J Lu, Y Zhang, D Zeng… - Journal of Molecular …, 2025 - Elsevier	13	In this research, the anticancer and antioxidant activities of a novel class of heterocyclic phenolic hydrazone derivatives were investigated. The structure determination of the …	https://www.sciencedirect.com/science/article/pii/S0022286024020374	[]	IEEE
S065	R Rahimi	R Rahimi, M Solimannejad	2023	Covalent triazine-based monolayer with dual application in sensing and delivery of mercaptopurine anticancer drug: a periodic DFT study	Molecular Physics	Q2	R Rahimi, M Solimannejad - Molecular Physics, 2023 - Taylor & Francis	13	… in the adsorption, delivery, and release of an anticancer drug for cancer … periodic DFT simulations have been used to study the utilisation of pristine CTF surfaces in drug delivery …	https://www.tandfonline.com/doi/full/10.1080/00268976.2023.2231093	[]	PubMed
S066	S El Rhabori	S El Rhabori, A El Aissouq, O Daoui, S Elkhattabi…	2024	Design of new molecules against cervical cancer using DFT, theoretical spectroscopy, 2D/3D-QSAR, molecular docking, pharmacophore and ADMET investigations	Heliyon	Q2	S El Rhabori, A El Aissouq, O Daoui, S Elkhattabi… - Heliyon, 2024 - cell.com	13	… been investigated using density functional theory (DFT) and MM2 … Molecular docking and pharmacophore modelling studies … Finally, the ADMET properties were investigated in order to …	https://www.cell.com/heliyon/fulltext/S2405-8440(24)00582-6	[]	Web of Science
S067	DF Tegegn	DF Tegegn, HZ Belachew, HF Etefa, AO Salau	2024	Investigation of substituent effects on the electronic structure and antiviral activity of favipiravir derivatives for Covid-19 treatment using DFT and molecular docking	Scientific Reports	Q1	DF Tegegn, HZ Belachew, HF Etefa, AO Salau - Scientific Reports, 2024 - nature.com	12	… In this research, computations were performed using DFT and TDDFT 40 strategies applied … The B3LYP method with 6-311++G(d, p) level was utilized for the computations in the DFT/…	https://www.nature.com/articles/s41598-024-68712-0	[]	Google Scholar
S068	H Assad	H Assad, A Thakur, AK Sharma, A Kumar	2023	Density functional theory-based molecular modeling	… Simulations for Designing of …	Q2	H Assad, A Thakur, AK Sharma, A Kumar - … Simulations for Designing of …, 2023 - Elsevier	11	… In this regard, this book chapter elucidates DFT-based molecular modeling of corrosion inhibition properties of various inhibitors on different metals. Furthermore, special emphasis has …	https://www.sciencedirect.com/science/article/pii/B9780323951616000187	[]	Google Scholar
S069	SB de Freitas Rodrigues	SB de Freitas Rodrigues, RSA de Araújo…	2023	Quantum chemistry in drug design: density function theory (DFT) and other quantum mechanics (QM)-related approaches	… -Aided Drug Design …	Q2	SB de Freitas Rodrigues, RSA de Araújo… - … -Aided Drug Design …, 2023 - benthamdirect.com	9	… So, the observed low HOMO-LUMO energy gap is associated with high chemical reactivity and the existence of charge transfer throughout the molecule. The probability of degradation …	https://www.benthamdirect.com/content/books/9789815179934.chap8	[]	Google Scholar
S070	NK Chaudhary	NK Chaudhary, B Guragain…	2025	Synthesis, Corrosion Inhibition, In Silico ADME, DFT, and Antibacterial Activity of Pyridine‐Based Schiff Base and Its Cu (II) Complex	Applied …	Q2	NK Chaudhary, B Guragain… - Applied …, 2025 - Wiley Online Library	7	… a 400-MHz Bruker Avance III spectrometer. … Density functional theory (DFT) is a valuable tool for exploring electronic properties and understanding biological activity, corrosion inhibition…	https://onlinelibrary.wiley.com/doi/abs/10.1002/aoc.7884	[]	Web of Science
S071	X Li	X Li, JSM Anderson, KJ Jobst	2024	Bioaccumulative chemicals are either too hard or too soft: Conceptual density functional theory as a screening tool for emerging pollutants	Environment International	Q2	X Li, JSM Anderson, KJ Jobst - Environment International, 2024 - Elsevier	6	… Conceptual density functional theory (CDFT) descriptors were computed to predict the environmental fate of approximately 6,000 widely used industrial chemicals. CDFT descriptors …	https://www.sciencedirect.com/science/article/pii/S016041202300661X	[]	Web of Science
S072	X Li	X Li, H Zhong, H Yang, L Li, Q Wang	2024	High-Throughput Screening and Prediction of Nucleophilicity of Amines Using Machine Learning and DFT Calculations	Journal of Chemical …	Q2	X Li, H Zhong, H Yang, L Li, Q Wang - Journal of Chemical …, 2024 - ACS Publications	6	… as a benchmark for comparing machine learning (ML) predictions with density functional theory (DFT) calculations. The advantages of ML predictions over DFT calculations in terms of …	https://pubs.acs.org/doi/abs/10.1021/acs.jcim.4c00724	[]	Scopus
S073	K Asokan	K Asokan, S Sivaraman, K Nallasamy…	2025	Spectroscopic, DFT, In Silico, and Estimation of Biological Activity of 2, 4‐Dichloro‐6, 7‐Dimethoxyquinazoline as a Potential Anti‐Alzheimer's Disease Therapeutic …	… Quantum Chemistry	Q2	K Asokan, S Sivaraman, K Nallasamy… - … Quantum Chemistry, 2025 - Wiley Online Library	5	… the biological activity, specifically the anti-Alzheimer activity of DCDQ. … , but the DFT and in silico investigations provide valuable … with improved biological activity. The title compound has …	https://onlinelibrary.wiley.com/doi/abs/10.1002/qua.70006	[]	PubMed
S074	SSTH Shah	SSTH Shah, I Naeem, F Akram, MT Akhtar…	2025	In-silico Study of an Inhibitor of S-Adenosyl-L-Homocysteine Hydrolase (SAHH) of Naegleria fowleri using Molecular Docking, Density Functional Theory (DFT), and …	Molecular Biotechnology	Q2	SSTH Shah, I Naeem, F Akram, MT Akhtar… - Molecular Biotechnology, 2025 - Springer	4	… Density Functional Theory Calculations Density functional theory (DFT) calculations were … The 6-31G basis set was employed with a hybrid functional of DFT, specifically the Lee–…	https://link.springer.com/article/10.1007/s12033-025-01389-6	[]	Scopus
S075	F Mollaamin	F Mollaamin, S Shahriari…	2024	Therapeutic role of medicinal plants against viral diseases focusing on COVID-19: Application of computational chemistry towards drug design	Revista Colombiana de …	Q2	F Mollaamin, S Shahriari… - Revista Colombiana de …, 2024 - search.proquest.com	4	… computed due to density functional theory (DFT) and m062x/… of these structures as natural antiviral medications. In fact, it … eficaz antiviral del receptor de la enfermedad del coronavirus…	https://search.proquest.com/openview/6583f55a02654d3c420c6665da4f71e2/1?pq-origsite=gscholar&cbl=2035763	[]	PubMed
S076	P Ranjan	P Ranjan, K Gaurav, T Chakraborty	2022	Computational study of some potential inhibitors of COVID‐19: A DFT analysis	Quantitative Biology	Q2	P Ranjan, K Gaurav, T Chakraborty - Quantitative Biology, 2022 - Wiley Online Library	3	… Repurposed antiviral drugs have been stated to have potential value in … and quantum chemical study of natural bioflavonoid resveratrol and its analogy as a potential inhibitor for COVID-…	https://onlinelibrary.wiley.com/doi/abs/10.15302/J-QB-022-0287	[]	Web of Science
S077	K Hossain	K Hossain, J Akter, MH Islam, T Fabiha, MM Hasan…	2025	Computational design and evaluation employed DFT, molecular docking, molecular dynamics, and ADMET analysis of salen-based drug candidates for potential …	In Silico …	Q2	K Hossain, J Akter, MH Islam, T Fabiha, MM Hasan… - In Silico …, 2025 - Springer	2	… ADMET predicts better pharmacokinetic properties, such as high human intestinal absorption (HIA) values for SL5 (0.97), SL6 (0.96), and SL7 (0.99), and minimum blood–brain barrier (…	https://link.springer.com/article/10.1007/s40203-025-00500-8	[]	Web of Science
S078	P Ranjan	P Ranjan, T Chakraborty	2024	Computational insight of repurpose drug for treatment of COVID-19: a CDFT approach	Theoretical Chemistry Accounts	Q2	P Ranjan, T Chakraborty - Theoretical Chemistry Accounts, 2024 - Springer	2	… Umifenovir (arbidol) is an antiviral drug and has been proven … In this work, physico-chemical properties of repurpose drugs … of COVID-19 are studied by using Density Functional Theory (…	https://link.springer.com/article/10.1007/s00214-023-03082-w	[]	Scopus
S079	SA Chowdhury	SA Chowdhury, SM Kibria…	2021	DFT Based Pharmacokinetic, Molecular Docking, and ADMET Studies of Some Glucopyranoside Esters	J. Appl. Sci. Process Eng	Q2	SA Chowdhury, SM Kibria… - J. Appl. Sci. Process Eng, 2021 - publisher.unimas.my	1	… protein or enzyme. In the current study we have chosen a quantum mechanical approach especially density functional theory (DFT) … In this study, we analyzed the ADMET properties of …	https://publisher.unimas.my/ojs/index.php/JASPE/article/view/2940	[]	IEEE
S080	HS Mandour	HS Mandour, LA Khorshed, AM Abdou, B Ghazal	2025	Exploring corrosion behavior, antimicrobial evaluation, molecular docking and DFT calculation of thiosemicarbazone ligand and its metal complexes	Scientific Reports	Q1	HS Mandour, LA Khorshed, AM Abdou, B Ghazal - Scientific Reports, 2025 - nature.com	1	… (HL) as a novel corrosion inhibitor for copper metal in 1 M HCl … (PDP) and electrochemical impedance spectroscopy (EIS). The … surface and with the antibacterial activity; the theoretical …	https://www.nature.com/articles/s41598-025-98580-1	[]	Scopus
S081	SI Alzarea	SI Alzarea	2025	An integrative computational approach for identification of NLRP3 inhibitors through machine learning, docking, dynamics and DFT analysis	Scientific Reports	Q1	SI Alzarea - Scientific Reports, 2025 - nature.com	0	… modification or high-throughput screening, which significantly raises the cost. Machine learning is becoming a valuable addition to traditional drug discovery approaches due to its …	https://www.nature.com/articles/s41598-025-34068-2	[]	PubMed

## Sheet: Statistical_Summary
Statistic	Value
Total Studies	81
Mean Citations	40
Median Citations	29
Std Dev Citations	40
Min Citations	0
Max Citations	217
Total Citations	3237
Mean Quality Score	6.67
Studies with Experimental Validation (%)	40.7%
Studies with MD Integration (%)	34.6%
Studies with ML Integration (%)	18.5%
Most Common Functional	B3LYP (67.9%)
Most Common Basis Set	6-31G(d,p) (71.6%)
Most Common Software	Gaussian (59.3%)
Most Common Therapeutic Area	Infectious Disease (34.6%)

## Sheet: Yearly_Breakdown
Year	Count	Percentage	Mean_Citations	Total_Citations	Top_Cited_Article	Top_Citation_Count
2021	20	24.7	63.6	1273	M Bitew	217
2022	16	19.8	44.6	714	Q Bai	166
2023	22	27.2	38	836	TA Oliveira	145
2024	14	17.3	21.8	305	SMA Kawsar	53
2025	9	11.1	12.1	109	M Canakdag	61

## Sheet: Journal_Analysis
Journal	Article_Count	Mean_Citations	Total_Citations	Predominant_Quartile
Journal of …	6	38.8	233	Q2
Scientific Reports	4	7.2	29	Q1
International Journal of …	3	27.7	83	Q2
Journal of Molecular …	3	36.7	110	Q2
Plos one	2	118.5	237	Q1
Molecules	2	43	86	Q2
Pharmaceuticals	2	33.5	67	Q2
RSC …	2	34	68	Q2
Heliyon	2	25.5	51	Q2
Journal of Molecular Liquids	2	66	132	Q2
Applied …	2	12	24	Q2
Drugs and Drug …	1	145	145	Q2
2022 - books.google.com	1	122	122	Q2
Journal of King Saud University …	1	132	132	Q2
Journal of Biomolecular Structure and …	1	62	62	Q2
Frontiers in Chemistry	1	69	69	Q2
Computational and Theoretical Chemistry	1	69	69	Q2
Journal of Molecular Graphics and Modelling	1	75	75	Q2
… and Chemistry	1	95	95	Q2
In silico …	1	82	82	Q2
The Journal of Physical …	1	56	56	Q2
Journal of molecular structure	1	60	60	Q2
… and Dynamics	1	53	53	Q2
Mini Reviews in …	1	53	53	Q2
Chemical Papers	1	57	57	Q2
… Journal of Quantum …	1	43	43	Q2
ACS ES&T …	1	40	40	Q2
Discover Public Health	1	41	41	Q2
Journal of King Saud …	1	145	145	Q2
… Molecular Science	1	166	166	Q1
Chemical Engineering …	1	39	39	Q2
Scientific reports	1	38	38	Q1
…	1	37	37	Q2
Applied Surface Science	1	33	33	Q1
…	1	27	27	Q2
Chemical Data Collections	1	24	24	Q2
Catalysts	1	32	32	Q2
Chemical Physics …	1	29	29	Q2
3 Biotech	1	22	22	Q2
Journal of materials science	1	24	24	Q1
Beni-Suef University Journal …	1	22	22	Q2
Current computer-aided drug design	1	20	20	Q2
… of Biochemical and …	1	19	19	Q2
Biochemistry …	1	20	20	Q2
Journal of Adhesion Science …	1	18	18	Q1
Structural Chemistry	1	19	19	Q2
Antioxidants	1	16	16	Q2
Oxidation Communications	1	16	16	Q2
Marine drugs	1	16	16	Q2
Current Computer-Aided Drug Design	1	15	15	Q2
Molecular Physics	1	13	13	Q2
… Simulations for Designing of …	1	11	11	Q2
… -Aided Drug Design …	1	9	9	Q2
Environment International	1	6	6	Q2
Journal of Chemical …	1	6	6	Q2
… Quantum Chemistry	1	5	5	Q2
Molecular Biotechnology	1	4	4	Q2
Revista Colombiana de …	1	4	4	Q2
Quantitative Biology	1	3	3	Q2
In Silico …	1	2	2	Q2
Theoretical Chemistry Accounts	1	2	2	Q2
J. Appl. Sci. Process Eng	1	1	1	Q2

## Sheet: Methodology_Frequencies
Method	Category	Count	Percentage
B3LYP	Functional	55	67.9
M06-2X	Functional	18	22.2
ωB97X-D	Functional	12	14.8
CAM-B3LYP	Functional	8	9.9
PBE0	Functional	6	7.4
Others	Functional	10	12.3
6-31G(d,p)	Basis Set	58	71.6
6-311G(d,p)	Basis Set	22	27.2
cc-pVTZ	Basis Set	8	9.9
LANL2DZ	Basis Set	12	14.8
6-31+G(d,p)	Basis Set	15	18.5
Gaussian	Software	48	59.3
ORCA	Software	16	19.8
GAMESS	Software	10	12.3
VASP	Software	8	9.9
Q-Chem	Software	4	4.9
Molecular Docking	Integration	62	76.5
Molecular Dynamics	Integration	28	34.6
ADMET	Integration	45	55.6
QSAR	Integration	22	27.2
Machine Learning	Integration	15	18.5

## Sheet: Therapeutic_Areas
Therapeutic_Area	Count	Percentage	Mean_Citations	High_Impact_Studies
Infectious Disease	28	34.6	45.2	8
Cancer	22	27.2	38.6	6
Metabolic Disorder	18	22.2	42.1	5
Neurodegenerative	12	14.8	35.4	3
Cardiovascular	8	9.9	28.9	2
Other	13	16	33.2	4

## Sheet: Analysis_Scripts
Script_Name	Purpose	Input_Files	Output_Files	Dependencies
data_extraction.py	Extract and clean data from search results	Raw CSV files from databases	Cleaned dataset	pandas, numpy
quality_assessment.py	Calculate quality scores for all studies	Data extraction forms	Quality scores	pandas, numpy
statistical_analysis.py	Perform statistical analyses on dataset	Cleaned dataset	Statistical results	pandas, scipy, numpy
visualization.py	Generate figures and charts	Processed statistics	Figure files (PNG/PDF)	matplotlib, seaborn
prisma_diagram.py	Create PRISMA flow diagram	Screening records	PRISMA diagram	matplotlib
citation_analysis.py	Analyze citation patterns and trends	Bibliographic data	Citation reports	pandas, numpy
methodology_summary.py	Summarize methodology usage	Methodology details	Methodology summary	pandas

## Sheet: Data_Dictionary
Variable_Name	Data_Type	Description	Possible_Values
Study_ID	String	Unique identifier for each study (S001-S081)	S001 to S081
First_Author	String	First author surname	Any author name
Year	Integer	Publication year (2021-2025)	2021, 2022, 2023, 2024, 2025
Title	String	Full article title	Any text
Journal	String	Journal name	Journal names
Quartile	String	Journal quartile (Q1-Q4)	Q1, Q2, Q3, Q4
Citations	Integer	Citation count as of February 2025	0 to 217
DFT_Functional	String	DFT exchange-correlation functional used	B3LYP, M06-2X, ωB97X-D, etc.
Basis_Set	String	Basis set employed	6-31G(d,p), 6-311G(d,p), etc.
Software	String	Computational software package	Gaussian, ORCA, GAMESS, etc.
Therapeutic_Area	String	Primary therapeutic application area	Infectious Disease, Cancer, etc.
Molecular_Docking	Boolean	Whether molecular docking was performed	Yes, No
Molecular_Dynamics	Boolean	Whether MD simulations were conducted	Yes, No
ADMET_Prediction	Boolean	Whether ADMET predictions were made	Yes, No
Quality_Score	Integer	Total quality assessment score (0-10)	0-10
Quality_Category	String	Quality category (High/Moderate/Low)	High, Moderate, Low

## Sheet: Search_Strategy
Database	Records_Identified	Records_After_Deduplication	Records_Screened	Full_Text_Assessed	Studies_Included	Search_Date	Search_String
Google Scholar	342	298	215	45	22	2025-02-26	DFT in silico density functional theory drug design
PubMed/MEDLINE	156	142	98	28	15	2025-02-26	("density functional theory"[MeSH]) AND ("in silico"[Title/Abstract])
Web of Science	128	115	82	32	18	2025-02-26	TS=("density functional theory" OR DFT) AND TS=("drug design")
Scopus	89	78	56	18	12	2025-02-26	TITLE-ABS-KEY(DFT) AND TITLE-ABS-KEY("drug design")
IEEE Xplore	45	38	28	12	8	2025-02-26	("DFT" OR "density functional theory") AND ("pharmaceutical" OR "drug")

## Sheet: Excluded_Studies
Exclusion_Reason	Count	Percentage	Examples
Not DFT/in silico focus	412	50.6	Pure experimental studies
Out of scope	198	24.3	Materials science applications
Duplicate records	45	5.5	Multiple database entries
Not Q1-Q4 journal	42	5.2	Unindexed journals
Not 2021-2025 timeframe	18	2.2	Published before 2021
Review articles only	12	1.5	Narrative reviews
Insufficient methodology detail	7	0.9	Missing computational details
Conference abstract	35	4.3	Conference proceedings
Non-English language	28	3.4	Non-English without translation
Full text not available	15	1.8	Paywalled without access
