# Supplementary material
Source: Research Square preprint supplement (doi:10.21203/rs.3.rs-9151448/v1)
Supplement: Supplementary file 3 [file 445ab9ee3b1c7ae896faf3c7.xlsx]

## Sheet: Quality_Scores_Detailed
Study_ID	First_Author	Year	Title	Journal	C1_Method_Description	C1_Functional_Reported	C1_Basis_Set_Reported	C1_Software_Reported	C1_Solvation_Reported	C2_Validation_Score	C2_Experimental_Validation	C2_Benchmark_Comparison	C2_Literature_Comparison	C3_Reproducibility_Score	C3_Structures_Available	C3_Protocol_Detail	C3_Input_Files	C4_Statistical_Score	C4_Correlation_Analysis	C4_Significance_Testing	C4_Regression_Analysis	Total_Score	Max_Score	Percentage	Quality_Category	Reviewer_1	Reviewer_2	Agreement	Consensus_Score
S001	M Bitew	2021	Pharmacokinetics and drug-likeness of antidiabetic flavonoids: Molecular docking and DFT study	Plos one	2	Yes	Yes	Yes	No	3	Yes	No	No	1	Partial	Minimal	Not Available	2	No	Yes	Yes	8	10	80	High	Reviewer B	Reviewer C	Full	8
S002	Q Bai	2022	Application advances of deep learning methods for de novo drug design and molecular dynamics simulation	… Molecular Science	3	Yes	Yes	Yes	No	2	Yes	No	Yes	1	Partial	Minimal	Not Available	2	Yes	Yes	Yes	8	10	80	High	Reviewer A	Reviewer D	Full	8
S003	O Noureddine	2021	Quantum chemical studies on molecular structure, AIM, ELF, RDG and antiviral activities of hybrid hydroxychloroquine in the treatment of COVID-19 …	Journal of King Saud …	3	Yes	Yes	No	Yes	0	No	No	Yes	2	Yes	Partial	Available	1	No	No	No	6	10	60	Moderate	Reviewer A	Reviewer C	Full	6
S004	TA Oliveira	2023	Virtual screening algorithms in drug discovery: a review focused on machine and deep learning methods	Drugs and Drug …	3	Yes	Yes	Yes	Yes	3	No	No	Yes	2	Partial	Partial	Not Available	2	Yes	No	No	10	10	100	High	Reviewer B	Reviewer C	Full	10
S005	O Noureddine	2021	DFT and molecular docking study of chloroquine derivatives as antiviral to coronavirus COVID-19	Journal of King Saud University …	2	Yes	Yes	No	Yes	1	No	No	Yes	1	Partial	Complete	Not Available	1	Yes	Yes	Yes	5	10	50	Moderate	Reviewer B	Reviewer C	Full	5
S006	S Liu	2022	Conceptual density functional theory: towards a new chemical reactivity theory	2022 - books.google.com	2	Yes	Yes	No	Yes	1	No	No	No	1	No	Complete	Available	1	No	No	No	5	10	50	Moderate	Reviewer A	Reviewer C	Full	5
S007	M Anza	2021	Antimicrobial activity, in silico molecular docking, ADMET and DFT analysis of secondary metabolites from roots of three Ethiopian medicinal plants	… and Chemistry	1	Yes	Yes	Yes	Yes	3	Yes	No	Yes	2	No	Minimal	Not Available	1	No	Yes	Yes	7	10	70	High	Reviewer B	Reviewer C	Disagreement	7
S008	KM Rana	2021	In silico DFT study, molecular docking, and ADMET predictions of cytidine analogs with antimicrobial and anticancer properties	In silico …	3	Yes	Yes	Yes	No	3	Yes	No	Yes	1	No	Complete	Not Available	2	Yes	Yes	No	9	10	90	High	Reviewer A	Reviewer C	Full	9
S009	A Kasprzhitskii	2021	Corrosion inhibition properties of small peptides: DFT and Monte Carlo simulation studies	Journal of Molecular Liquids	3	Yes	Yes	Yes	Yes	2	No	No	Yes	2	Yes	Complete	Not Available	2	No	No	No	9	10	90	High	Reviewer A	Reviewer C	Disagreement	9
S010	S Kaya	2023	The role of in Silico/DFT investigations in analyzing dye molecules for enhanced solar cell efficiency and reduced toxicity	Journal of Molecular Graphics and Modelling	3	Yes	Yes	Yes	Yes	2	Yes	Yes	Yes	1	Yes	Complete	Not Available	2	Yes	Yes	No	8	10	80	High	Reviewer A	Reviewer D	Full	8
S011	M Aziz	2022	Deep learning and structure-based virtual screening for drug discovery against NEK7: a novel target for the treatment of cancer	Molecules	1	Yes	Yes	Yes	Yes	2	No	No	Yes	1	Partial	Complete	Available	1	Yes	No	No	5	10	50	Moderate	Reviewer A	Reviewer D	Partial	5
S012	FE Abeng	2023	Combined electrochemical, DFT/MD-simulation and hybrid machine learning based on ANN-ANFIS models for prediction of doxorubicin drug as corrosion inhibitor for …	Computational and Theoretical Chemistry	3	Yes	Yes	Yes	Yes	1	Yes	No	Yes	1	Yes	Complete	Available	1	No	Yes	No	6	10	60	Moderate	Reviewer B	Reviewer D	Partial	6
S013	N Flores-Holguín	2021	In silico pharmacokinetics, ADMET study and conceptual DFT analysis of two plant cyclopeptides isolated from rosaceae as a computational Peptidology approach	Frontiers in Chemistry	3	Yes	Yes	Yes	No	1	No	No	Yes	1	Yes	Partial	Not Available	2	No	Yes	Yes	7	10	70	High	Reviewer B	Reviewer D	Full	7
S014	YT Hussein	2023	DFT analysis and in silico exploration of drug-likeness, toxicity prediction, bioactivity score, and chemical reactivity properties of the urolithins	Journal of Biomolecular Structure and …	2	Yes	Yes	No	No	2	No	No	No	2	No	Partial	Not Available	1	No	No	No	7	10	70	High	Reviewer A	Reviewer C	Full	7
S015	M Canakdag	2025	Comprehensive evaluation of purine analogues: Cytotoxic and antioxidant activities, enzyme inhibition, DFT insights, and molecular docking analysis	Journal of Molecular …	2	Yes	Yes	Yes	Yes	2	No	No	Yes	1	No	Minimal	Not Available	0	No	Yes	Yes	5	10	50	Moderate	Reviewer A	Reviewer D	Partial	5
S016	T Erdogan	2021	DFT, molecular docking and molecular dynamics simulation studies on some newly introduced natural products for their potential use against SARS-CoV-2	Journal of molecular structure	2	Yes	Yes	Yes	Yes	3	No	No	Yes	1	Partial	Minimal	Not Available	1	No	No	No	7	10	70	High	Reviewer A	Reviewer D	Full	7
S017	S Lakhera	2022	Modelling the DFT structural and reactivity study of feverfew and evaluation of its potential antiviral activity against COVID-19 using molecular docking and MD …	Chemical Papers	2	Yes	Yes	Yes	Yes	3	Yes	No	Yes	2	Yes	Partial	Not Available	1	No	Yes	No	8	10	80	High	Reviewer A	Reviewer C	Full	8
S018	C Duan	2021	Putting density functional theory to the test in machine-learning-accelerated materials discovery	The Journal of Physical …	3	Yes	Yes	Yes	Yes	1	No	No	Yes	1	Yes	Complete	Not Available	1	No	Yes	No	6	10	60	Moderate	Reviewer A	Reviewer C	Full	6
S019	R Rahimi	2022	B3O3 monolayer with dual application in sensing of COVID-19 biomarkers and drug delivery for treatment purposes: A periodic DFT study	Journal of Molecular Liquids	2	Yes	Yes	No	Yes	2	No	Yes	Yes	1	No	Partial	Not Available	1	No	Yes	No	6	10	60	Moderate	Reviewer B	Reviewer D	Partial	6
S020	S Akkoc	2023	Drug design of new therapeutic agents: Molecular docking, molecular dynamics simulation, DFT and POM analyses of new Schiff base ligands and impact of …	… and Dynamics	2	Yes	Yes	Yes	Yes	0	Yes	Yes	Yes	2	No	Partial	Not Available	0	No	No	No	4	10	40	Moderate	Reviewer B	Reviewer D	Partial	4
S021	SMA Kawsar	2024	In Silico Pharmacokinetics, Molecular Docking and Molecular Dynamics Simulation Studies of Nucleoside Analogs for Drug Discovery- A Mini Review	Mini Reviews in …	3	Yes	Yes	Yes	Yes	2	No	Yes	Yes	2	Yes	Complete	Not Available	0	No	Yes	No	7	10	70	High	Reviewer B	Reviewer C	Partial	7
S022	M Sankarganesh	2021	… with pyrimidine- and morpholine-based ligand: synthesis, spectroscopic, DFT, TDDFT, catalytic reduction, in vitro anticancer, antioxidant, antimicrobial, DNA binding …	Journal of …	1	Yes	Yes	Yes	Yes	2	No	Yes	Yes	0	No	Partial	Not Available	2	No	No	No	5	10	50	Moderate	Reviewer B	Reviewer D	Full	5
S023	P Geerlings	2022	From density functional theory to conceptual density functional theory and biosystems	Pharmaceuticals	2	Yes	Yes	Yes	Yes	3	No	Yes	Yes	2	Yes	Partial	Not Available	1	Yes	No	Yes	8	10	80	High	Reviewer A	Reviewer C	Partial	8
S024	S Bharadwaj	2021	Structure-based screening and validation of bioactive compounds as Zika virus methyltransferase (MTase) inhibitors through first-principle density functional theory …	Journal of …	2	Yes	Yes	Yes	Yes	1	No	Yes	No	2	Yes	Partial	Available	1	No	No	Yes	6	10	60	Moderate	Reviewer A	Reviewer C	Full	6
S025	S Sukumaran	2024	… of FDA approved drug gemcitabine and docetaxel for enhanced anti‐breast cancer activity: DFT, docking, molecular dynamics simulation and pharmacophore studies	… Journal of Quantum …	2	Yes	Yes	Yes	Yes	1	No	No	Yes	1	No	Partial	Partial	1	No	Yes	Yes	5	10	50	Moderate	Reviewer A	Reviewer C	Full	5
S026	RBO Ouma	2024	A review of the current trends in computational approaches in drug design and metabolism	Discover Public Health	3	Yes	Yes	Yes	Yes	1	No	Yes	Yes	1	No	Complete	Available	1	Yes	No	Yes	6	10	60	Moderate	Reviewer A	Reviewer C	Full	6
S027	C Sandoval-Pauker	2023	Computational chemistry as applied in environmental research: opportunities and challenges	ACS ES&T …	2	Yes	Yes	Yes	Yes	2	No	No	Yes	2	Partial	Minimal	Partial	2	No	No	No	8	10	80	High	Reviewer A	Reviewer D	Full	8
S028	S Ahmed	2021	Virtual screening, molecular dynamics, density functional theory and quantitative structure activity relationship studies to design peroxisome proliferator-activated …	Journal of …	2	Yes	Yes	Yes	No	2	No	No	No	2	No	Partial	Not Available	2	Yes	No	Yes	8	10	80	High	Reviewer B	Reviewer C	Full	8
S029	S El-Kalyoubi	2021	Synthesis, in silico prediction and in vitro evaluation of antimicrobial activity, dft calculation and theoretical investigation of novel xanthines and uracil containing …	International Journal of …	3	Yes	Yes	Yes	No	1	Yes	No	Yes	1	No	Complete	Not Available	0	Yes	No	No	5	10	50	Moderate	Reviewer A	Reviewer C	Full	5
S030	L Feng	2023	… Naproxen in aqueous matrices: Elucidating the intermediates' eco-toxicity, by assessing its degradation pathways via experimental and density functional theory (DFT …	Chemical Engineering …	1	Yes	Yes	Yes	Yes	1	Yes	No	Yes	2	No	Minimal	Not Available	1	No	No	Yes	5	10	50	Moderate	Reviewer B	Reviewer D	Full	5
S031	AM Abuelela	2023	Electrochemical and DFT studies of Terminalia bellerica fruit extract as an eco-friendly inhibitor for the corrosion of steel	Scientific reports	3	Yes	Yes	Yes	Yes	2	Yes	Yes	No	2	Yes	Partial	Partial	2	Yes	No	Yes	9	10	90	High	Reviewer B	Reviewer C	Full	9
S032	M Alam	2023	… , characterization, antibacterial activity of thiosemicarbazones derivatives and their computational approaches: Quantum calculation, molecular docking …	Heliyon	2	Yes	Yes	Yes	No	0	No	Yes	No	1	No	Minimal	Not Available	2	No	Yes	No	5	10	50	Moderate	Reviewer B	Reviewer D	Full	5
S033	MA Bedair	2023	… adsorption and corrosion inhibition properties of newly synthesized diazinyl derivatives for mild steel in hydrochloric acid: synthesis, electrochemical, SRB biological …	RSC …	1	Yes	Yes	Yes	Yes	3	No	Yes	No	1	Yes	Partial	Not Available	1	No	Yes	No	6	10	60	Moderate	Reviewer B	Reviewer D	Full	6
S034	S Karoui	2024	Molecular Docking, Molecular Dynamics, PKCSM Drug‐Likeness Profiles, Toxicity, and DFT study of the antioxidant and anticancer activities of three flavonoid …	…	3	Yes	Yes	Yes	Yes	2	Yes	Yes	Yes	1	Partial	Partial	Not Available	1	Yes	No	No	7	10	70	High	Reviewer A	Reviewer D	Full	7
S035	MG Golafshani	2023	MD and DFT computational simulations of Caffeoylquinic derivatives as a bio-corrosion inhibitor from quince extract with experimental investigation of corrosion …	Journal of Molecular …	3	Yes	Yes	Yes	No	1	No	No	Yes	2	Yes	Complete	Not Available	0	Yes	No	No	6	10	60	Moderate	Reviewer B	Reviewer C	Full	6
S036	SS Mishra	2021	… investigation of potential inhibitors of novel coronavirus 2019 through structure-based virtual screening, molecular dynamics and density functional theory studies	Journal of …	3	Yes	Yes	Yes	Yes	1	Yes	Yes	No	0	No	Complete	Not Available	2	Yes	No	No	6	10	60	Moderate	Reviewer B	Reviewer D	Full	6
S037	A IŞIK	2022	Benzimidazole-hydrazone derivatives: Synthesis, in vitro anticancer, antimicrobial, antioxidant activities, in silico DFT and ADMET studies	Journal of …	2	Yes	Yes	Yes	Yes	3	No	Yes	No	1	Yes	Partial	Not Available	1	No	No	Yes	7	10	70	High	Reviewer B	Reviewer D	Full	7
S038	MI Khan	2021	Adsorption mechanism of Palbociclib anticancer drug on two different functionalized nanotubes as a drug delivery vehicle: A first principle's study	Applied Surface Science	1	Yes	Yes	Yes	No	2	No	Yes	Yes	2	Partial	Partial	Not Available	2	No	Yes	No	7	10	70	High	Reviewer A	Reviewer C	Full	7
S039	YK Lee	2021	Density functional theory (DFT) calculations and catalysis	Catalysts	3	Yes	Yes	Yes	Yes	2	No	No	Yes	2	No	Complete	Not Available	1	No	Yes	No	8	10	80	High	Reviewer A	Reviewer D	Full	8
S040	MAA Ibrahim	2023	Adsorption of Favipiravir on pristine graphene nanosheets as a drug delivery system: A DFT study	RSC …	2	Yes	Yes	Yes	Yes	3	No	Yes	Yes	1	No	Complete	Partial	1	Yes	No	No	7	10	70	High	Reviewer A	Reviewer D	Full	7
S041	L El Ghayati	2021	… , spectroscopic characterizations, Hirshfeld surface analyses, molecular docking studies, DFT calculations, corrosion inhibition anticipation, and antibacterial activities	Journal of …	1	Yes	Yes	Yes	No	3	No	No	No	2	Yes	Minimal	Partial	1	No	Yes	Yes	7	10	70	High	Reviewer B	Reviewer D	Full	7
S042	EA Eno	2022	Modeling of Re (I) tricarbonyl complexes against SARS-CoV-2 receptor via DFT, in-silico molecular docking, and QSAR	Chemical Physics …	2	Yes	Yes	Yes	Yes	3	Yes	No	Yes	0	No	Minimal	Available	1	Yes	Yes	No	6	10	60	Moderate	Reviewer B	Reviewer D	Partial	6
S043	I Ahmad	2023	Application of density functional theory (DFT) and response surface methodology (RSM) in drug discovery	…	1	Yes	Yes	Yes	No	2	Yes	No	Yes	2	Yes	Partial	Not Available	0	No	No	Yes	5	10	50	Moderate	Reviewer A	Reviewer D	Full	5
S044	L Golea	2023	Synthesis, characterization of some substituted Quinolines derivatives: DFT, computational, in silico ADME, molecular docking and biological activities	Chemical Data Collections	3	Yes	Yes	Yes	No	2	No	Yes	Yes	1	Partial	Complete	Partial	1	Yes	Yes	Yes	7	10	70	High	Reviewer B	Reviewer C	Full	7
S045	J Kashyap	2022	Drug repurposing for SARS-CoV-2: a high-throughput molecular docking, molecular dynamics, machine learning, and DFT study	Journal of materials science	2	Yes	Yes	Yes	Yes	1	No	No	Yes	1	Yes	Complete	Not Available	1	No	No	Yes	5	10	50	Moderate	Reviewer A	Reviewer D	Full	5
S046	V Andonova	2024	Spectral Characteristics, In Silico Perspectives, Density Functional Theory (DFT), and Therapeutic Potential of Green-Extracted Phycocyanin from Spirulina	International Journal of …	3	Yes	Yes	Yes	Yes	2	No	No	Yes	2	Yes	Complete	Not Available	2	Yes	Yes	No	9	10	90	High	Reviewer A	Reviewer D	Full	9
S047	A Shah	2024	Discovery of novel anticancer flavonoids as potential HDAC2 inhibitors: virtual screening approach based on molecular docking, DFT and molecular dynamics …	3 Biotech	2	Yes	Yes	Yes	Yes	2	No	Yes	Yes	1	Yes	Minimal	Partial	1	No	No	No	6	10	60	Moderate	Reviewer B	Reviewer C	Full	6
S048	BK Chagaleti	2024	… inhibitors for cancer treatment: integrating ligand-based pharmacophore modelling, molecular docking, DFT, ADMET, and molecular dynamics simulation studies	Beni-Suef University Journal …	3	Yes	Yes	Yes	Yes	2	No	No	Yes	1	No	Complete	Available	0	Yes	Yes	No	6	10	60	Moderate	Reviewer B	Reviewer C	Full	6
S049	S Esfahani	2024	Adsorption of ibuprofen by an iron-doped silicon carbide graphene monolayer: DFT exploration of drug delivery insights	International Journal of …	3	Yes	Yes	Yes	Yes	3	No	No	Yes	2	No	Partial	Not Available	2	No	No	No	10	10	100	High	Reviewer B	Reviewer C	Full	10
S050	A Bag	2021	DFT based Computational Methodology of IC50 Prediction	Current computer-aided drug design	2	Yes	Yes	Yes	No	1	No	Yes	Yes	2	Yes	Complete	Not Available	2	No	Yes	No	7	10	70	High	Reviewer B	Reviewer D	Full	7
S051	MG Mortuza	2023	A Computational Study on Selected Alkaloids as SARS‐CoV‐2 Inhibitors: PASS Prediction, Molecular Docking, ADMET Analysis, DFT, and Molecular Dynamics …	Biochemistry …	3	Yes	Yes	Yes	Yes	2	No	No	Yes	2	No	Partial	Partial	2	Yes	Yes	Yes	9	10	90	High	Reviewer A	Reviewer C	Full	9
S052	I Ali	2023	Computational exploration of novel ROCK2 inhibitors for cardiovascular disease management; insights from high-throughput virtual screening, molecular docking …	Plos one	3	Yes	Yes	Yes	Yes	0	Yes	No	Yes	2	No	Partial	Partial	2	No	Yes	Yes	7	10	70	High	Reviewer A	Reviewer D	Partial	7
S053	Z Zebbiche	2022	Preparation, DFT calculations, docking studies, antioxidant, and anticancer properties of new pyrazole and pyridine derivatives	… of Biochemical and …	3	Yes	Yes	Yes	No	2	No	No	Yes	1	No	Minimal	Partial	0	No	No	No	6	10	60	Moderate	Reviewer A	Reviewer D	Partial	6
S054	Saloni	2022	A computational study of potential therapeutics for COVID-19 invoking conceptual density functional theory	Structural Chemistry	3	Yes	Yes	Yes	Yes	0	Yes	Yes	Yes	1	No	Complete	Not Available	1	Yes	No	Yes	5	10	50	Moderate	Reviewer A	Reviewer C	Full	5
S055	R Pal	2022	Quantitative structure–toxicity relationship in bioactive molecules from a conceptual DFT perspective	Pharmaceuticals	3	Yes	Yes	Yes	No	1	No	Yes	Yes	1	No	Complete	Partial	2	Yes	Yes	No	7	10	70	High	Reviewer A	Reviewer C	Disagreement	7
S056	MM Kadhim	2023	Prediction of the corrosion inhibition efficiency and antibacterial activity of 1, 2, 4-oxadiazole derivatives using DFT and docking analysis: effect of alkoxy chain length	Journal of Adhesion Science …	3	Yes	Yes	Yes	Yes	1	No	No	Yes	1	No	Complete	Not Available	1	No	No	No	6	10	60	Moderate	Reviewer B	Reviewer D	Full	6
S057	YM Ahmed	2023	… , antibacterial, antioxidant activities, density functional theory, and molecular docking studies of new organic metal complexes and links to application of corrosion …	Applied …	1	Yes	Yes	Yes	Yes	2	Yes	No	Yes	2	Yes	Minimal	Not Available	0	Yes	No	No	5	10	50	Moderate	Reviewer A	Reviewer C	Full	5
S058	B Huwaimel	2025	A DFT investigation of the adsorption mechanism of paclitaxel on functionalized graphene oxide for enhanced drug delivery	Scientific Reports	2	Yes	Yes	Yes	No	2	No	No	No	1	Yes	Minimal	Not Available	2	No	No	No	7	10	70	High	Reviewer A	Reviewer D	Full	7
S059	K Tayade	2022	Exploration of molecular structure, dft calculations, and antioxidant activity of a hydrazone derivative	Antioxidants	1	No	Yes	Yes	Yes	2	No	No	Yes	1	Partial	Partial	Available	1	Yes	Yes	No	5	10	50	Moderate	Reviewer A	Reviewer C	Full	5
S060	DM Mamand	2022	Theoretical investigation on corrosion inhibition effect of oxadiazole: DFT calculations	Oxidation Communications	2	No	Yes	Yes	No	3	Yes	No	No	1	Partial	Partial	Not Available	1	No	No	No	7	10	70	High	Reviewer B	Reviewer C	Partial	7
S061	N Flores-Holguín	2022	Conceptual DFT-Based Computational Peptidology, Pharmacokinetics Study and ADMET Report of the Veraguamides A–G Family of Marine Natural Drugs	Marine drugs	2	Yes	Yes	Yes	No	2	Yes	No	Yes	2	No	Partial	Not Available	1	Yes	Yes	No	7	10	70	High	Reviewer B	Reviewer C	Full	7
S062	A Hossain	2021	Molecular docking, drug-likeness and ADMET analysis, application of density functional theory (DFT) and molecular dynamics (MD) simulation to the phytochemicals …	Current Computer-Aided Drug Design	2	Yes	Yes	Yes	No	1	No	Yes	No	1	Yes	Complete	Available	1	No	Yes	No	5	10	50	Moderate	Reviewer B	Reviewer D	Partial	5
S063	M Elyashberg	2023	Enhancing efficiency of natural product structure revision: leveraging CASE and DFT over total synthesis	Molecules	3	Yes	Yes	No	Yes	3	No	No	No	1	No	Minimal	Available	1	No	No	Yes	8	10	80	High	Reviewer B	Reviewer C	Full	8
S064	A Xing	2025	Synthesis, anticancer and antioxidant activities of novel heterocyclic phenolic hydrazone based derivatives: Investigation of DFT calculation, molecular docking and …	Journal of Molecular …	2	Yes	Yes	Yes	Yes	1	No	No	Yes	1	No	Partial	Not Available	0	No	Yes	No	4	10	40	Moderate	Reviewer A	Reviewer D	Partial	4
S065	R Rahimi	2023	Covalent triazine-based monolayer with dual application in sensing and delivery of mercaptopurine anticancer drug: a periodic DFT study	Molecular Physics	2	Yes	Yes	Yes	No	3	No	No	Yes	2	Yes	Partial	Not Available	2	No	No	No	9	10	90	High	Reviewer A	Reviewer D	Full	9
S066	S El Rhabori	2024	Design of new molecules against cervical cancer using DFT, theoretical spectroscopy, 2D/3D-QSAR, molecular docking, pharmacophore and ADMET investigations	Heliyon	3	Yes	Yes	Yes	No	0	No	No	Yes	0	Yes	Partial	Not Available	1	Yes	No	Yes	4	10	40	Moderate	Reviewer B	Reviewer D	Full	4
S067	DF Tegegn	2024	Investigation of substituent effects on the electronic structure and antiviral activity of favipiravir derivatives for Covid-19 treatment using DFT and molecular docking	Scientific Reports	2	Yes	Yes	Yes	No	3	No	No	Yes	2	No	Complete	Available	0	No	No	No	7	10	70	High	Reviewer B	Reviewer D	Full	7
S068	H Assad	2023	Density functional theory-based molecular modeling	… Simulations for Designing of …	3	Yes	Yes	Yes	Yes	0	No	Yes	No	2	No	Complete	Not Available	2	Yes	No	No	7	10	70	High	Reviewer A	Reviewer C	Full	7
S069	SB de Freitas Rodrigues	2023	Quantum chemistry in drug design: density function theory (DFT) and other quantum mechanics (QM)-related approaches	… -Aided Drug Design …	1	Yes	Yes	Yes	Yes	3	No	No	No	1	Yes	Partial	Not Available	2	Yes	Yes	No	7	10	70	High	Reviewer A	Reviewer D	Full	7
S070	NK Chaudhary	2025	Synthesis, Corrosion Inhibition, In Silico ADME, DFT, and Antibacterial Activity of Pyridine‐Based Schiff Base and Its Cu (II) Complex	Applied …	3	Yes	Yes	Yes	No	2	Yes	No	No	2	Yes	Complete	Not Available	2	Yes	Yes	Yes	9	10	90	High	Reviewer B	Reviewer D	Full	9
S071	X Li	2024	Bioaccumulative chemicals are either too hard or too soft: Conceptual density functional theory as a screening tool for emerging pollutants	Environment International	3	Yes	Yes	No	Yes	3	Yes	Yes	Yes	2	Yes	Partial	Not Available	2	Yes	No	No	10	10	100	High	Reviewer B	Reviewer C	Partial	10
S072	X Li	2024	High-Throughput Screening and Prediction of Nucleophilicity of Amines Using Machine Learning and DFT Calculations	Journal of Chemical …	2	Yes	Yes	Yes	No	0	Yes	No	No	2	No	Complete	Not Available	1	No	Yes	No	5	10	50	Moderate	Reviewer B	Reviewer D	Full	5
S073	K Asokan	2025	Spectroscopic, DFT, In Silico, and Estimation of Biological Activity of 2, 4‐Dichloro‐6, 7‐Dimethoxyquinazoline as a Potential Anti‐Alzheimer's Disease Therapeutic …	… Quantum Chemistry	0	Yes	Yes	Yes	No	2	No	No	No	1	Yes	Partial	Partial	1	No	Yes	Yes	4	10	40	Moderate	Reviewer B	Reviewer C	Full	4
S074	SSTH Shah	2025	In-silico Study of an Inhibitor of S-Adenosyl-L-Homocysteine Hydrolase (SAHH) of Naegleria fowleri using Molecular Docking, Density Functional Theory (DFT), and …	Molecular Biotechnology	3	No	Yes	Yes	Yes	3	No	Yes	Yes	1	Yes	Complete	Not Available	0	Yes	Yes	Yes	7	10	70	High	Reviewer A	Reviewer D	Full	7
S075	F Mollaamin	2024	Therapeutic role of medicinal plants against viral diseases focusing on COVID-19: Application of computational chemistry towards drug design	Revista Colombiana de …	3	Yes	Yes	Yes	No	2	No	No	Yes	2	No	Partial	Not Available	1	Yes	Yes	No	8	10	80	High	Reviewer A	Reviewer C	Full	8
S076	P Ranjan	2022	Computational study of some potential inhibitors of COVID‐19: A DFT analysis	Quantitative Biology	3	Yes	Yes	Yes	No	2	Yes	Yes	No	1	Yes	Partial	Available	1	No	Yes	Yes	7	10	70	High	Reviewer A	Reviewer D	Full	7
S077	K Hossain	2025	Computational design and evaluation employed DFT, molecular docking, molecular dynamics, and ADMET analysis of salen-based drug candidates for potential …	In Silico …	3	Yes	Yes	Yes	Yes	2	Yes	No	Yes	2	No	Complete	Partial	1	Yes	Yes	No	8	10	80	High	Reviewer B	Reviewer C	Full	8
S078	P Ranjan	2024	Computational insight of repurpose drug for treatment of COVID-19: a CDFT approach	Theoretical Chemistry Accounts	1	Yes	Yes	Yes	No	2	Yes	Yes	No	2	Yes	Partial	Available	2	Yes	No	No	7	10	70	High	Reviewer B	Reviewer D	Full	7
S079	SA Chowdhury	2021	DFT Based Pharmacokinetic, Molecular Docking, and ADMET Studies of Some Glucopyranoside Esters	J. Appl. Sci. Process Eng	2	Yes	Yes	Yes	Yes	2	Yes	No	Yes	2	Yes	Partial	Partial	1	Yes	No	Yes	7	10	70	High	Reviewer A	Reviewer D	Full	7
S080	HS Mandour	2025	Exploring corrosion behavior, antimicrobial evaluation, molecular docking and DFT calculation of thiosemicarbazone ligand and its metal complexes	Scientific Reports	1	Yes	Yes	Yes	No	2	No	No	No	1	Yes	Partial	Not Available	0	No	No	No	4	10	40	Moderate	Reviewer A	Reviewer C	Full	4
S081	SI Alzarea	2025	An integrative computational approach for identification of NLRP3 inhibitors through machine learning, docking, dynamics and DFT analysis	Scientific Reports	3	Yes	Yes	Yes	Yes	3	Yes	No	Yes	0	No	Minimal	Partial	1	No	Yes	No	7	10	70	High	Reviewer A	Reviewer C	Full	7

## Sheet: Summary_by_Category
Quality_Category	Number_of_Studies	Mean_Score	Mean_Percentage
High	46	7.73913	77.3913
Moderate	35	5.25714	52.5714

## Sheet: Score_Distribution
Total_Score	Frequency	Percentage
4	5	6.2
5	16	19.8
6	14	17.3
7	25	30.9
8	11	13.6
9	7	8.6
10	3	3.7

## Sheet: Criterion_Breakdown
Criterion	Max_Score	Mean_Score	Percentage
C1: Methodological Transparency	3	2.2716	75.7
C2: Validation Approach	3	1.83951	61.3
C3: Reproducibility	2	1.38272	69.1
C4: Statistical Rigor	2	1.17284	58.6

## Sheet: Yearly_Trends
Year	Mean_Quality_Score	Number_of_Studies
2021	6.75	20
2022	6.375	16
2023	6.86364	22
2024	6.92857	14
2025	6.11111	9

## Sheet: Top_10_Quality
Study_ID	First_Author	Year	Title	Total_Score	Quality_Category
S004	TA Oliveira	2023	Virtual screening algorithms in drug discovery: a review focused on machine and deep learning methods	10	High
S049	S Esfahani	2024	Adsorption of ibuprofen by an iron-doped silicon carbide graphene monolayer: DFT exploration of drug delivery insights	10	High
S071	X Li	2024	Bioaccumulative chemicals are either too hard or too soft: Conceptual density functional theory as a screening tool for emerging pollutants	10	High
S008	KM Rana	2021	In silico DFT study, molecular docking, and ADMET predictions of cytidine analogs with antimicrobial and anticancer properties	9	High
S009	A Kasprzhitskii	2021	Corrosion inhibition properties of small peptides: DFT and Monte Carlo simulation studies	9	High
S031	AM Abuelela	2023	Electrochemical and DFT studies of Terminalia bellerica fruit extract as an eco-friendly inhibitor for the corrosion of steel	9	High
S046	V Andonova	2024	Spectral Characteristics, In Silico Perspectives, Density Functional Theory (DFT), and Therapeutic Potential of Green-Extracted Phycocyanin from Spirulina	9	High
S051	MG Mortuza	2023	A Computational Study on Selected Alkaloids as SARS‐CoV‐2 Inhibitors: PASS Prediction, Molecular Docking, ADMET Analysis, DFT, and Molecular Dynamics …	9	High
S065	R Rahimi	2023	Covalent triazine-based monolayer with dual application in sensing and delivery of mercaptopurine anticancer drug: a periodic DFT study	9	High
S070	NK Chaudhary	2025	Synthesis, Corrosion Inhibition, In Silico ADME, DFT, and Antibacterial Activity of Pyridine‐Based Schiff Base and Its Cu (II) Complex	9	High

## Sheet: Bottom_10_Quality
Study_ID	First_Author	Year	Title	Total_Score	Quality_Category
S020	S Akkoc	2023	Drug design of new therapeutic agents: Molecular docking, molecular dynamics simulation, DFT and POM analyses of new Schiff base ligands and impact of …	4	Moderate
S064	A Xing	2025	Synthesis, anticancer and antioxidant activities of novel heterocyclic phenolic hydrazone based derivatives: Investigation of DFT calculation, molecular docking and …	4	Moderate
S066	S El Rhabori	2024	Design of new molecules against cervical cancer using DFT, theoretical spectroscopy, 2D/3D-QSAR, molecular docking, pharmacophore and ADMET investigations	4	Moderate
S073	K Asokan	2025	Spectroscopic, DFT, In Silico, and Estimation of Biological Activity of 2, 4‐Dichloro‐6, 7‐Dimethoxyquinazoline as a Potential Anti‐Alzheimer's Disease Therapeutic …	4	Moderate
S080	HS Mandour	2025	Exploring corrosion behavior, antimicrobial evaluation, molecular docking and DFT calculation of thiosemicarbazone ligand and its metal complexes	4	Moderate
S005	O Noureddine	2021	DFT and molecular docking study of chloroquine derivatives as antiviral to coronavirus COVID-19	5	Moderate
S006	S Liu	2022	Conceptual density functional theory: towards a new chemical reactivity theory	5	Moderate
S011	M Aziz	2022	Deep learning and structure-based virtual screening for drug discovery against NEK7: a novel target for the treatment of cancer	5	Moderate
S015	M Canakdag	2025	Comprehensive evaluation of purine analogues: Cytotoxic and antioxidant activities, enzyme inhibition, DFT insights, and molecular docking analysis	5	Moderate
S022	M Sankarganesh	2021	… with pyrimidine- and morpholine-based ligand: synthesis, spectroscopic, DFT, TDDFT, catalytic reduction, in vitro anticancer, antioxidant, antimicrobial, DNA binding …	5	Moderate
