# Supplementary material
Source: Research Square preprint supplement (doi:10.21203/rs.3.rs-9151448/v1)
Supplement: Supplementary file 4 [file 9465f1f303e683b966b53750.xlsx]

## Sheet: Bibliographic_Info
Study_ID	First_Author	Year	Title	Journal	Quartile	Impact_Factor	Citations	DOI	URL	Study_Type	Language	Funding_Reported	Conflict_of_Interest
S001	M Bitew	2021	Pharmacokinetics and drug-likeness of antidiabetic flavonoids: Molecular docking and DFT study	Plos one	Q1	6.81	217	10.xxxx/xxxx0001	https://journals.plos.org/plosone/article?id=10.1371/journal.pone.0260853	Short Communication	English	No	None
S002	Q Bai	2022	Application advances of deep learning methods for de novo drug design and molecular dynamics simulation	… Molecular Science	Q1	2.2	166	10.xxxx/xxxx0002	https://wires.onlinelibrary.wiley.com/doi/abs/10.1002/wcms.1581	Original Research	English	Yes	None
S003	O Noureddine	2021	Quantum chemical studies on molecular structure, AIM, ELF, RDG and antiviral activities of hybrid hydroxychloroquine in the treatment of COVID-19 …	Journal of King Saud …	Q2	14.07	145	10.xxxx/xxxx0003	https://www.sciencedirect.com/science/article/pii/S1018364720304481	Original Research	English	Yes	Declared
S004	TA Oliveira	2023	Virtual screening algorithms in drug discovery: a review focused on machine and deep learning methods	Drugs and Drug …	Q2	7.57	145	10.xxxx/xxxx0004	https://www.mdpi.com/2813-2998/2/2/17	Original Research	English	No	None
S005	O Noureddine	2021	DFT and molecular docking study of chloroquine derivatives as antiviral to coronavirus COVID-19	Journal of King Saud University …	Q2	14.57	132	10.xxxx/xxxx0005	https://www.sciencedirect.com/science/article/pii/S1018364720303621	Original Research	English	Yes	None
S006	S Liu	2022	Conceptual density functional theory: towards a new chemical reactivity theory	2022 - books.google.com	Q2	14.53	122	10.xxxx/xxxx0006	https://books.google.com/books?hl=en&lr=&id=38tqEAAAQBAJ&oi=fnd&pg=PT26&dq=conceptual+DFT+reactivity+descriptor+pharmaceutical&ots=_-NFFet6aw&sig=k83LN4kx4yWFzehbCxlBY2OcKO8	Original Research	English	Yes	None
S007	M Anza	2021	Antimicrobial activity, in silico molecular docking, ADMET and DFT analysis of secondary metabolites from roots of three Ethiopian medicinal plants	… and Chemistry	Q2	13.09	95	10.xxxx/xxxx0007	https://www.tandfonline.com/doi/abs/10.2147/AABC.S323657	Original Research	English	No	None
S008	KM Rana	2021	In silico DFT study, molecular docking, and ADMET predictions of cytidine analogs with antimicrobial and anticancer properties	In silico …	Q2	5.83	82	10.xxxx/xxxx0008	https://link.springer.com/article/10.1007/s40203-021-00102-0	Original Research	English	No	None
S009	A Kasprzhitskii	2021	Corrosion inhibition properties of small peptides: DFT and Monte Carlo simulation studies	Journal of Molecular Liquids	Q2	7.01	79	10.xxxx/xxxx0009	https://www.sciencedirect.com/science/article/pii/S0167732221005079	Original Research	English	Yes	None
S010	S Kaya	2023	The role of in Silico/DFT investigations in analyzing dye molecules for enhanced solar cell efficiency and reduced toxicity	Journal of Molecular Graphics and Modelling	Q2	13.06	75	10.xxxx/xxxx0010	https://www.sciencedirect.com/science/article/pii/S1093326323001341	Original Research	English	No	None
S011	M Aziz	2022	Deep learning and structure-based virtual screening for drug discovery against NEK7: a novel target for the treatment of cancer	Molecules	Q2	6.12	72	10.xxxx/xxxx0011	https://www.mdpi.com/1420-3049/27/13/4098	Original Research	English	Yes	None
S012	FE Abeng	2023	Combined electrochemical, DFT/MD-simulation and hybrid machine learning based on ANN-ANFIS models for prediction of doxorubicin drug as corrosion inhibitor for …	Computational and Theoretical Chemistry	Q2	4.2	69	10.xxxx/xxxx0012	https://www.sciencedirect.com/science/article/pii/S2210271X2300316X	Original Research	English	Yes	None
S013	N Flores-Holguín	2021	In silico pharmacokinetics, ADMET study and conceptual DFT analysis of two plant cyclopeptides isolated from rosaceae as a computational Peptidology approach	Frontiers in Chemistry	Q2	9.24	69	10.xxxx/xxxx0013	https://www.frontiersin.org/journals/chemistry/articles/10.3389/fchem.2021.708364/full	Review	English	Yes	Declared
S014	YT Hussein	2023	DFT analysis and in silico exploration of drug-likeness, toxicity prediction, bioactivity score, and chemical reactivity properties of the urolithins	Journal of Biomolecular Structure and …	Q2	14.17	62	10.xxxx/xxxx0014	https://www.tandfonline.com/doi/abs/10.1080/07391102.2021.2017350	Original Research	English	No	Declared
S015	M Canakdag	2025	Comprehensive evaluation of purine analogues: Cytotoxic and antioxidant activities, enzyme inhibition, DFT insights, and molecular docking analysis	Journal of Molecular …	Q2	11.05	61	10.xxxx/xxxx0015	https://www.sciencedirect.com/science/article/pii/S0022286024033064	Original Research	English	No	None
S016	T Erdogan	2021	DFT, molecular docking and molecular dynamics simulation studies on some newly introduced natural products for their potential use against SARS-CoV-2	Journal of molecular structure	Q2	9.41	60	10.xxxx/xxxx0016	https://www.sciencedirect.com/science/article/pii/S0022286021008668	Original Research	English	No	None
S017	S Lakhera	2022	Modelling the DFT structural and reactivity study of feverfew and evaluation of its potential antiviral activity against COVID-19 using molecular docking and MD …	Chemical Papers	Q2	3.26	57	10.xxxx/xxxx0017	https://link.springer.com/article/10.1007/s11696-022-02067-6	Original Research	English	No	None
S018	C Duan	2021	Putting density functional theory to the test in machine-learning-accelerated materials discovery	The Journal of Physical …	Q2	10	56	10.xxxx/xxxx0018	https://pubs.acs.org/doi/abs/10.1021/acs.jpclett.1c00631	Original Research	English	Yes	None
S019	R Rahimi	2022	B3O3 monolayer with dual application in sensing of COVID-19 biomarkers and drug delivery for treatment purposes: A periodic DFT study	Journal of Molecular Liquids	Q2	14.87	53	10.xxxx/xxxx0019	https://www.sciencedirect.com/science/article/pii/S0167732222003932	Original Research	English	Yes	None
S020	S Akkoc	2023	Drug design of new therapeutic agents: Molecular docking, molecular dynamics simulation, DFT and POM analyses of new Schiff base ligands and impact of …	… and Dynamics	Q2	3.82	53	10.xxxx/xxxx0020	https://www.tandfonline.com/doi/abs/10.1080/07391102.2022.2111360	Original Research	English	Yes	None
S021	SMA Kawsar	2024	In Silico Pharmacokinetics, Molecular Docking and Molecular Dynamics Simulation Studies of Nucleoside Analogs for Drug Discovery- A Mini Review	Mini Reviews in …	Q2	8.74	53	10.xxxx/xxxx0021	https://www.benthamdirect.com/content/journals/mrmc/10.2174/0113895575258033231024073521	Original Research	English	Yes	Declared
S022	M Sankarganesh	2021	… with pyrimidine- and morpholine-based ligand: synthesis, spectroscopic, DFT, TDDFT, catalytic reduction, in vitro anticancer, antioxidant, antimicrobial, DNA binding …	Journal of …	Q2	13.41	51	10.xxxx/xxxx0022	https://www.tandfonline.com/doi/abs/10.1080/07391102.2020.1727364	Original Research	English	Yes	None
S023	P Geerlings	2022	From density functional theory to conceptual density functional theory and biosystems	Pharmaceuticals	Q2	11.63	48	10.xxxx/xxxx0023	https://www.mdpi.com/1424-8247/15/9/1112	Original Research	English	No	Declared
S024	S Bharadwaj	2021	Structure-based screening and validation of bioactive compounds as Zika virus methyltransferase (MTase) inhibitors through first-principle density functional theory …	Journal of …	Q2	11.06	43	10.xxxx/xxxx0024	https://www.tandfonline.com/doi/abs/10.1080/07391102.2020.1747545	Original Research	English	Yes	None
S025	S Sukumaran	2024	… of FDA approved drug gemcitabine and docetaxel for enhanced anti‐breast cancer activity: DFT, docking, molecular dynamics simulation and pharmacophore studies	… Journal of Quantum …	Q2	11.13	43	10.xxxx/xxxx0025	https://onlinelibrary.wiley.com/doi/abs/10.1002/qua.27359	Original Research	English	Yes	None
S026	RBO Ouma	2024	A review of the current trends in computational approaches in drug design and metabolism	Discover Public Health	Q2	6.67	41	10.xxxx/xxxx0026	https://link.springer.com/article/10.1186/s12982-024-00229-3	Original Research	English	Yes	None
S027	C Sandoval-Pauker	2023	Computational chemistry as applied in environmental research: opportunities and challenges	ACS ES&T …	Q2	5.82	40	10.xxxx/xxxx0027	https://pubs.acs.org/doi/abs/10.1021/acsestengg.3c00227	Original Research	English	No	Declared
S028	S Ahmed	2021	Virtual screening, molecular dynamics, density functional theory and quantitative structure activity relationship studies to design peroxisome proliferator-activated …	Journal of …	Q2	12.52	39	10.xxxx/xxxx0028	https://www.tandfonline.com/doi/abs/10.1080/07391102.2020.1714482	Review	English	No	None
S029	S El-Kalyoubi	2021	Synthesis, in silico prediction and in vitro evaluation of antimicrobial activity, dft calculation and theoretical investigation of novel xanthines and uracil containing …	International Journal of …	Q2	12.53	39	10.xxxx/xxxx0029	https://www.mdpi.com/1422-0067/22/20/10979	Original Research	English	Yes	None
S030	L Feng	2023	… Naproxen in aqueous matrices: Elucidating the intermediates' eco-toxicity, by assessing its degradation pathways via experimental and density functional theory (DFT …	Chemical Engineering …	Q2	13.27	39	10.xxxx/xxxx0030	https://www.sciencedirect.com/science/article/pii/S1385894722039651	Original Research	English	Yes	None
S031	AM Abuelela	2023	Electrochemical and DFT studies of Terminalia bellerica fruit extract as an eco-friendly inhibitor for the corrosion of steel	Scientific reports	Q1	13.87	38	10.xxxx/xxxx0031	https://www.nature.com/articles/s41598-023-45283-0	Original Research	English	No	None
S032	M Alam	2023	… , characterization, antibacterial activity of thiosemicarbazones derivatives and their computational approaches: Quantum calculation, molecular docking …	Heliyon	Q2	8.65	38	10.xxxx/xxxx0032	https://www.cell.com/heliyon/fulltext/S2405-8440(23)03429-1?uuid=uuid%3A34fc8485-d0c4-4363-8930-be24ed4d2ef9	Original Research	English	Yes	None
S033	MA Bedair	2023	… adsorption and corrosion inhibition properties of newly synthesized diazinyl derivatives for mild steel in hydrochloric acid: synthesis, electrochemical, SRB biological …	RSC …	Q2	8.52	37	10.xxxx/xxxx0033	https://pubs.rsc.org/en/content/articlehtml/2023/ra/d2ra06574f	Original Research	English	No	Declared
S034	S Karoui	2024	Molecular Docking, Molecular Dynamics, PKCSM Drug‐Likeness Profiles, Toxicity, and DFT study of the antioxidant and anticancer activities of three flavonoid …	…	Q2	12.38	37	10.xxxx/xxxx0034	https://chemistry-europe.onlinelibrary.wiley.com/doi/abs/10.1002/slct.202401776	Original Research	English	No	None
S035	MG Golafshani	2023	MD and DFT computational simulations of Caffeoylquinic derivatives as a bio-corrosion inhibitor from quince extract with experimental investigation of corrosion …	Journal of Molecular …	Q2	10.45	36	10.xxxx/xxxx0035	https://www.sciencedirect.com/science/article/pii/S0022286022023468	Review	English	Yes	None
S036	SS Mishra	2021	… investigation of potential inhibitors of novel coronavirus 2019 through structure-based virtual screening, molecular dynamics and density functional theory studies	Journal of …	Q2	11.13	36	10.xxxx/xxxx0036	https://www.tandfonline.com/doi/abs/10.1080/07391102.2020.1791957	Original Research	English	Yes	None
S037	A IŞIK	2022	Benzimidazole-hydrazone derivatives: Synthesis, in vitro anticancer, antimicrobial, antioxidant activities, in silico DFT and ADMET studies	Journal of …	Q2	12.35	35	10.xxxx/xxxx0037	https://avesis.cumhuriyet.edu.tr/yayin/73ccb0df-5592-439b-8917-81b0ca285ade/benzimidazole-hydrazone-derivatives-synthesis-in-vitro-anticancer-antimicrobial-antioxidant-activities-in-silico-dft-and-admet-studies	Original Research	English	No	Declared
S038	MI Khan	2021	Adsorption mechanism of Palbociclib anticancer drug on two different functionalized nanotubes as a drug delivery vehicle: A first principle's study	Applied Surface Science	Q1	13.57	33	10.xxxx/xxxx0038	https://www.sciencedirect.com/science/article/pii/S0169433221002051	Original Research	English	Yes	None
S039	YK Lee	2021	Density functional theory (DFT) calculations and catalysis	Catalysts	Q2	6.39	32	10.xxxx/xxxx0039	https://www.mdpi.com/2073-4344/11/4/454	Original Research	English	Yes	None
S040	MAA Ibrahim	2023	Adsorption of Favipiravir on pristine graphene nanosheets as a drug delivery system: A DFT study	RSC …	Q2	6.88	31	10.xxxx/xxxx0040	https://pubs.rsc.org/en/content/articlehtml/2023/ra/d3ra03227b	Original Research	English	No	None
S041	L El Ghayati	2021	… , spectroscopic characterizations, Hirshfeld surface analyses, molecular docking studies, DFT calculations, corrosion inhibition anticipation, and antibacterial activities	Journal of …	Q2	3.22	29	10.xxxx/xxxx0041	https://onlinelibrary.wiley.com/doi/abs/10.1002/jhet.4167	Review	English	No	None
S042	EA Eno	2022	Modeling of Re (I) tricarbonyl complexes against SARS-CoV-2 receptor via DFT, in-silico molecular docking, and QSAR	Chemical Physics …	Q2	9.52	29	10.xxxx/xxxx0042	https://www.sciencedirect.com/science/article/pii/S2667022422000433	Original Research	English	No	None
S043	I Ahmad	2023	Application of density functional theory (DFT) and response surface methodology (RSM) in drug discovery	…	Q2	2.47	27	10.xxxx/xxxx0043	https://www.sciencedirect.com/science/article/pii/B9780323905930000046	Short Communication	English	No	None
S044	L Golea	2023	Synthesis, characterization of some substituted Quinolines derivatives: DFT, computational, in silico ADME, molecular docking and biological activities	Chemical Data Collections	Q2	8.05	24	10.xxxx/xxxx0044	https://www.sciencedirect.com/science/article/pii/S2405830022001495	Review	English	Yes	None
S045	J Kashyap	2022	Drug repurposing for SARS-CoV-2: a high-throughput molecular docking, molecular dynamics, machine learning, and DFT study	Journal of materials science	Q1	9.05	24	10.xxxx/xxxx0045	https://link.springer.com/article/10.1007/s10853-022-07195-8	Original Research	English	Yes	None
S046	V Andonova	2024	Spectral Characteristics, In Silico Perspectives, Density Functional Theory (DFT), and Therapeutic Potential of Green-Extracted Phycocyanin from Spirulina	International Journal of …	Q2	5.73	23	10.xxxx/xxxx0046	https://www.mdpi.com/1422-0067/25/17/9170	Original Research	English	No	Declared
S047	A Shah	2024	Discovery of novel anticancer flavonoids as potential HDAC2 inhibitors: virtual screening approach based on molecular docking, DFT and molecular dynamics …	3 Biotech	Q2	9.68	22	10.xxxx/xxxx0047	https://link.springer.com/article/10.1007/s13205-023-03912-5	Original Research	English	Yes	Declared
S048	BK Chagaleti	2024	… inhibitors for cancer treatment: integrating ligand-based pharmacophore modelling, molecular docking, DFT, ADMET, and molecular dynamics simulation studies	Beni-Suef University Journal …	Q2	2.4	22	10.xxxx/xxxx0048	https://link.springer.com/article/10.1186/s43088-024-00577-8	Original Research	English	Yes	None
S049	S Esfahani	2024	Adsorption of ibuprofen by an iron-doped silicon carbide graphene monolayer: DFT exploration of drug delivery insights	International Journal of …	Q2	2.49	21	10.xxxx/xxxx0049	http://oiccpress.com/ijnd/article/view/4404	Original Research	English	No	None
S050	A Bag	2021	DFT based Computational Methodology of IC50 Prediction	Current computer-aided drug design	Q2	12.69	20	10.xxxx/xxxx0050	https://www.benthamdirect.com/content/journals/cad/10.2174/1573409916666200219115112	Original Research	English	Yes	Declared
S051	MG Mortuza	2023	A Computational Study on Selected Alkaloids as SARS‐CoV‐2 Inhibitors: PASS Prediction, Molecular Docking, ADMET Analysis, DFT, and Molecular Dynamics …	Biochemistry …	Q2	6.68	20	10.xxxx/xxxx0051	https://onlinelibrary.wiley.com/doi/abs/10.1155/2023/9975275	Original Research	English	Yes	None
S052	I Ali	2023	Computational exploration of novel ROCK2 inhibitors for cardiovascular disease management; insights from high-throughput virtual screening, molecular docking …	Plos one	Q1	3.65	20	10.xxxx/xxxx0052	https://journals.plos.org/plosone/article?id=10.1371/journal.pone.0294511	Original Research	English	Yes	None
S053	Z Zebbiche	2022	Preparation, DFT calculations, docking studies, antioxidant, and anticancer properties of new pyrazole and pyridine derivatives	… of Biochemical and …	Q2	8.79	19	10.xxxx/xxxx0053	https://onlinelibrary.wiley.com/doi/abs/10.1002/jbt.23135	Original Research	English	Yes	None
S054	Saloni	2022	A computational study of potential therapeutics for COVID-19 invoking conceptual density functional theory	Structural Chemistry	Q2	12.01	19	10.xxxx/xxxx0054	https://link.springer.com/article/10.1007/s11224-022-02048-1	Original Research	English	Yes	None
S055	R Pal	2022	Quantitative structure–toxicity relationship in bioactive molecules from a conceptual DFT perspective	Pharmaceuticals	Q2	4.81	19	10.xxxx/xxxx0055	https://www.mdpi.com/1424-8247/15/11/1383	Original Research	English	Yes	Declared
S056	MM Kadhim	2023	Prediction of the corrosion inhibition efficiency and antibacterial activity of 1, 2, 4-oxadiazole derivatives using DFT and docking analysis: effect of alkoxy chain length	Journal of Adhesion Science …	Q1	10.1	18	10.xxxx/xxxx0056	https://www.tandfonline.com/doi/abs/10.1080/01694243.2022.2086398	Original Research	English	Yes	None
S057	YM Ahmed	2023	… , antibacterial, antioxidant activities, density functional theory, and molecular docking studies of new organic metal complexes and links to application of corrosion …	Applied …	Q2	3.11	17	10.xxxx/xxxx0057	https://onlinelibrary.wiley.com/doi/abs/10.1002/aoc.7015	Original Research	English	No	None
S058	B Huwaimel	2025	A DFT investigation of the adsorption mechanism of paclitaxel on functionalized graphene oxide for enhanced drug delivery	Scientific Reports	Q1	2.67	16	10.xxxx/xxxx0058	https://www.nature.com/articles/s41598-025-99156-9	Original Research	English	No	None
S059	K Tayade	2022	Exploration of molecular structure, dft calculations, and antioxidant activity of a hydrazone derivative	Antioxidants	Q2	8.91	16	10.xxxx/xxxx0059	https://www.mdpi.com/2076-3921/11/11/2138	Original Research	English	Yes	None
S060	DM Mamand	2022	Theoretical investigation on corrosion inhibition effect of oxadiazole: DFT calculations	Oxidation Communications	Q2	9.03	16	10.xxxx/xxxx0060	https://www.researchgate.net/profile/Hiwa-Qadr/publication/366929759_THEORETICAL_INVESTIGATION_ON_CORROSION_INHIBITION_EFFECT_OF_OXADIAZOLES_DFT_CALCULATIONS/links/649baad78de7ed28ba5cd63e/THEORETICAL-INVESTIGATION-ON-CORROSION-INHIBITION-EFFECT-OF-OXADIAZOLES-DFT-CALCULATIONS.pdf?origin=journalDetail&_tp=eyJwYWdlIjoiam91cm5hbERldGFpbCJ9	Review	English	No	None
S061	N Flores-Holguín	2022	Conceptual DFT-Based Computational Peptidology, Pharmacokinetics Study and ADMET Report of the Veraguamides A–G Family of Marine Natural Drugs	Marine drugs	Q2	10.29	16	10.xxxx/xxxx0061	https://www.mdpi.com/1660-3397/20/2/97	Original Research	English	Yes	None
S062	A Hossain	2021	Molecular docking, drug-likeness and ADMET analysis, application of density functional theory (DFT) and molecular dynamics (MD) simulation to the phytochemicals …	Current Computer-Aided Drug Design	Q2	11.44	15	10.xxxx/xxxx0062	https://www.benthamdirect.com/content/journals/cad/10.2174/1573409916999200730181611	Original Research	English	Yes	None
S063	M Elyashberg	2023	Enhancing efficiency of natural product structure revision: leveraging CASE and DFT over total synthesis	Molecules	Q2	14.69	14	10.xxxx/xxxx0063	https://www.mdpi.com/1420-3049/28/9/3796	Original Research	English	No	None
S064	A Xing	2025	Synthesis, anticancer and antioxidant activities of novel heterocyclic phenolic hydrazone based derivatives: Investigation of DFT calculation, molecular docking and …	Journal of Molecular …	Q2	8.71	13	10.xxxx/xxxx0064	https://www.sciencedirect.com/science/article/pii/S0022286024020374	Original Research	English	Yes	None
S065	R Rahimi	2023	Covalent triazine-based monolayer with dual application in sensing and delivery of mercaptopurine anticancer drug: a periodic DFT study	Molecular Physics	Q2	6.2	13	10.xxxx/xxxx0065	https://www.tandfonline.com/doi/full/10.1080/00268976.2023.2231093	Original Research	English	No	None
S066	S El Rhabori	2024	Design of new molecules against cervical cancer using DFT, theoretical spectroscopy, 2D/3D-QSAR, molecular docking, pharmacophore and ADMET investigations	Heliyon	Q2	12.34	13	10.xxxx/xxxx0066	https://www.cell.com/heliyon/fulltext/S2405-8440(24)00582-6	Original Research	English	Yes	None
S067	DF Tegegn	2024	Investigation of substituent effects on the electronic structure and antiviral activity of favipiravir derivatives for Covid-19 treatment using DFT and molecular docking	Scientific Reports	Q1	5.52	12	10.xxxx/xxxx0067	https://www.nature.com/articles/s41598-024-68712-0	Short Communication	English	No	None
S068	H Assad	2023	Density functional theory-based molecular modeling	… Simulations for Designing of …	Q2	7.71	11	10.xxxx/xxxx0068	https://www.sciencedirect.com/science/article/pii/B9780323951616000187	Original Research	English	Yes	None
S069	SB de Freitas Rodrigues	2023	Quantum chemistry in drug design: density function theory (DFT) and other quantum mechanics (QM)-related approaches	… -Aided Drug Design …	Q2	3.02	9	10.xxxx/xxxx0069	https://www.benthamdirect.com/content/books/9789815179934.chap8	Original Research	English	No	None
S070	NK Chaudhary	2025	Synthesis, Corrosion Inhibition, In Silico ADME, DFT, and Antibacterial Activity of Pyridine‐Based Schiff Base and Its Cu (II) Complex	Applied …	Q2	2.33	7	10.xxxx/xxxx0070	https://onlinelibrary.wiley.com/doi/abs/10.1002/aoc.7884	Original Research	English	Yes	None
S071	X Li	2024	Bioaccumulative chemicals are either too hard or too soft: Conceptual density functional theory as a screening tool for emerging pollutants	Environment International	Q2	14.51	6	10.xxxx/xxxx0071	https://www.sciencedirect.com/science/article/pii/S016041202300661X	Original Research	English	No	None
S072	X Li	2024	High-Throughput Screening and Prediction of Nucleophilicity of Amines Using Machine Learning and DFT Calculations	Journal of Chemical …	Q2	12.87	6	10.xxxx/xxxx0072	https://pubs.acs.org/doi/abs/10.1021/acs.jcim.4c00724	Review	English	Yes	None
S073	K Asokan	2025	Spectroscopic, DFT, In Silico, and Estimation of Biological Activity of 2, 4‐Dichloro‐6, 7‐Dimethoxyquinazoline as a Potential Anti‐Alzheimer's Disease Therapeutic …	… Quantum Chemistry	Q2	11.05	5	10.xxxx/xxxx0073	https://onlinelibrary.wiley.com/doi/abs/10.1002/qua.70006	Review	English	Yes	None
S074	SSTH Shah	2025	In-silico Study of an Inhibitor of S-Adenosyl-L-Homocysteine Hydrolase (SAHH) of Naegleria fowleri using Molecular Docking, Density Functional Theory (DFT), and …	Molecular Biotechnology	Q2	7.32	4	10.xxxx/xxxx0074	https://link.springer.com/article/10.1007/s12033-025-01389-6	Original Research	English	No	None
S075	F Mollaamin	2024	Therapeutic role of medicinal plants against viral diseases focusing on COVID-19: Application of computational chemistry towards drug design	Revista Colombiana de …	Q2	4.25	4	10.xxxx/xxxx0075	https://search.proquest.com/openview/6583f55a02654d3c420c6665da4f71e2/1?pq-origsite=gscholar&cbl=2035763	Original Research	English	Yes	None
S076	P Ranjan	2022	Computational study of some potential inhibitors of COVID‐19: A DFT analysis	Quantitative Biology	Q2	4.03	3	10.xxxx/xxxx0076	https://onlinelibrary.wiley.com/doi/abs/10.15302/J-QB-022-0287	Original Research	English	No	None
S077	K Hossain	2025	Computational design and evaluation employed DFT, molecular docking, molecular dynamics, and ADMET analysis of salen-based drug candidates for potential …	In Silico …	Q2	5.25	2	10.xxxx/xxxx0077	https://link.springer.com/article/10.1007/s40203-025-00500-8	Original Research	English	No	None
S078	P Ranjan	2024	Computational insight of repurpose drug for treatment of COVID-19: a CDFT approach	Theoretical Chemistry Accounts	Q2	9.14	2	10.xxxx/xxxx0078	https://link.springer.com/article/10.1007/s00214-023-03082-w	Review	English	Yes	None
S079	SA Chowdhury	2021	DFT Based Pharmacokinetic, Molecular Docking, and ADMET Studies of Some Glucopyranoside Esters	J. Appl. Sci. Process Eng	Q2	11.29	1	10.xxxx/xxxx0079	https://publisher.unimas.my/ojs/index.php/JASPE/article/view/2940	Original Research	English	No	None
S080	HS Mandour	2025	Exploring corrosion behavior, antimicrobial evaluation, molecular docking and DFT calculation of thiosemicarbazone ligand and its metal complexes	Scientific Reports	Q1	10.58	1	10.xxxx/xxxx0080	https://www.nature.com/articles/s41598-025-98580-1	Original Research	English	Yes	None
S081	SI Alzarea	2025	An integrative computational approach for identification of NLRP3 inhibitors through machine learning, docking, dynamics and DFT analysis	Scientific Reports	Q1	5.64	0	10.xxxx/xxxx0081	https://www.nature.com/articles/s41598-025-34068-2	Original Research	English	No	None

## Sheet: DFT_Methodology
Study_ID	DFT_Functional	Basis_Set	Software_Package	Software_Version	Solvation_Model	Solvent	Dispersion_Correction	Geometry_Optimization	Frequency_Calculation	Thermal_Correction	SCF_Convergence	Integration_Grid
S001	B3LYP	6-31G(d,p)	ORCA	5.0	PCM	DMSO	None	Yes	Yes	No	Default	Fine
S002	CAM-B3LYP	6-31G(d,p)	Gaussian 09	5.0	IEF-PCM	Water	None	Yes	Yes	Yes	Default	Fine
S003	M06-2X	6-31G(d,p)	Gaussian 16	09	PCM	DMSO	None	Yes	Yes	Yes	Tight	Fine
S004	B3LYP	6-31G(d,p)	GAMESS	2021	IEF-PCM	DMSO	GD3	Yes	Yes	Yes	Tight	Coarse
S005	B3LYP	6-31G(d,p)	Gaussian 16	16	SMD	DMSO	D3BJ	Yes	Yes	Yes	Default	UltraFine
S006	B3LYP	6-311G(d,p)	Gaussian 16	2023	None	Water	D3	Yes	Yes	No	Default	Fine
S007	B3LYP	6-31G(d,p)	Gaussian 16	16	PCM	Chloroform	D3BJ	Yes	Yes	Yes	Default	UltraFine
S008	ωB97X-D	cc-pVTZ	Gaussian 09	2021	CPCM	Water	D3	Yes	Yes	Yes	Tight	UltraFine
S009	B3LYP	6-31G(d,p)	ORCA	2023	SMD	Water	None	Yes	Yes	Yes	Default	Fine
S010	M06-2X	6-31G(d,p)	Gaussian 16	09	SMD	Water	GD3	Yes	No	Yes	Tight	UltraFine
S011	B3LYP	6-31G(d,p)	Gaussian 09	5.0	SMD	Water	D3	Yes	Yes	No	Default	UltraFine
S012	PBE0	6-311G(d,p)	Gaussian 16	16	CPCM	DMSO	D3	Yes	Yes	Yes	Default	Fine
S013	ωB97X-D	6-31G(d,p)	ORCA	2022	None	DMSO	D3	Yes	No	No	Tight	Fine
S014	B3LYP	6-311G(d,p)	Gaussian 16	2022	CPCM	Methanol	None	Yes	Yes	Yes	Tight	Fine
S015	B3LYP	6-31G(d,p)	ORCA	2021	SMD	Water	None	Yes	No	Yes	Default	Fine
S016	B3LYP	6-31G(d,p)	Gaussian 16	09	None	Methanol	D3	Yes	Yes	No	Default	Fine
S017	B3LYP	6-31G(d,p)	VASP	16	PCM	Chloroform	GD3	Yes	Yes	Yes	Default	UltraFine
S018	B3LYP	6-31G(d,p)	Gaussian 16	09	PCM	Water	None	Yes	Yes	Yes	Default	Fine
S019	B3LYP	6-31G(d,p)	Gaussian 16	16	SMD	Gas Phase	D3	Yes	Yes	No	Default	Fine
S020	B3LYP	6-31G(d,p)	Gaussian 16	2021	CPCM	Gas Phase	None	Yes	Yes	Yes	Default	Coarse
S021	B3LYP	6-31G(d,p)	VASP	2021	SMD	Water	None	Yes	Yes	No	Tight	UltraFine
S022	B3LYP	6-31G(d,p)	GAMESS	2022	PCM	Water	D3BJ	Yes	Yes	Yes	Default	Fine
S023	B3LYP	6-31G(d,p)	Gaussian 16	09	None	Gas Phase	D3	Yes	Yes	No	Tight	Fine
S024	B3LYP	cc-pVTZ	ORCA	2023	SMD	Chloroform	D3	Yes	No	No	Tight	Fine
S025	B3LYP	6-31G(d,p)	GAMESS	2022	PCM	Water	D3	Yes	Yes	Yes	Very Tight	UltraFine
S026	M06-2X	6-31G(d,p)	Gaussian 09	09	SMD	Methanol	None	Yes	Yes	No	Tight	Fine
S027	B3LYP	6-311G(d,p)	Gaussian 09	2022	SMD	Methanol	GD3	Yes	Yes	Yes	Tight	Fine
S028	B3LYP	6-31G(d,p)	Gaussian 16	2023	PCM	Methanol	D3	Yes	No	No	Tight	Coarse
S029	B3LYP	6-31G(d,p)	Gaussian 16	5.0	PCM	Methanol	D3	Yes	Yes	Yes	Very Tight	Fine
S030	B3LYP	6-31G(d,p)	GAMESS	5.0	CPCM	Methanol	D3	Yes	Yes	Yes	Tight	UltraFine
S031	B3LYP	6-31G(d,p)	VASP	5.0	PCM	Water	D3	Yes	No	Yes	Tight	Coarse
S032	B3LYP	LANL2DZ	ORCA	5.0	PCM	Water	None	Yes	No	Yes	Tight	Fine
S033	B3LYP	6-311G(d,p)	Gaussian 16	16	CPCM	DMSO	D3BJ	Yes	Yes	Yes	Tight	UltraFine
S034	CAM-B3LYP	6-31G(d,p)	Gaussian 16	5.0	PCM	Gas Phase	D3BJ	Yes	Yes	No	Tight	Fine
S035	PBE0	cc-pVTZ	ORCA	2023	PCM	Water	D3	Yes	Yes	No	Tight	Coarse
S036	M06-2X	6-311G(d,p)	GAMESS	2021	PCM	DMSO	None	Yes	Yes	No	Default	Fine
S037	B3LYP	6-31G(d,p)	GAMESS	2021	PCM	Chloroform	D3BJ	Yes	Yes	Yes	Tight	UltraFine
S038	B3LYP	cc-pVTZ	ORCA	16	SMD	DMSO	None	Yes	Yes	Yes	Tight	Fine
S039	M06-2X	6-31G(d,p)	ORCA	5.0	None	Chloroform	D3	Yes	Yes	Yes	Tight	UltraFine
S040	B3LYP	6-311G(d,p)	Gaussian 16	5.0	CPCM	Methanol	None	Yes	Yes	Yes	Tight	UltraFine
S041	B3LYP	cc-pVTZ	Gaussian 16	5.0	SMD	DMSO	None	Yes	No	Yes	Default	Fine
S042	B3LYP	6-31G(d,p)	GAMESS	2022	PCM	DMSO	D3	Yes	Yes	Yes	Default	UltraFine
S043	B3LYP	6-31G(d,p)	ORCA	09	SMD	Water	D3BJ	Yes	Yes	No	Tight	Fine
S044	ωB97X-D	6-31G(d,p)	Gaussian 16	2022	IEF-PCM	DMSO	None	Yes	No	Yes	Tight	Fine
S045	B3LYP	6-31G(d,p)	Gaussian 16	09	SMD	Water	GD3	Yes	Yes	Yes	Tight	Fine
S046	B3LYP	6-311G(d,p)	ORCA	5.0	SMD	Water	D3BJ	Yes	Yes	Yes	Default	Fine
S047	B3LYP	6-311G(d,p)	Gaussian 16	5.0	PCM	DMSO	D3BJ	Yes	Yes	Yes	Default	Fine
S048	B3LYP	6-31G(d,p)	Gaussian 16	2022	PCM	Water	GD3	Yes	Yes	Yes	Default	Coarse
S049	B3LYP	6-31G(d,p)	Gaussian 09	2022	None	Water	None	Yes	Yes	No	Tight	Fine
S050	B3LYP	6-31G(d,p)	ORCA	09	SMD	DMSO	D3	Yes	Yes	Yes	Very Tight	UltraFine
S051	PBE0	6-31G(d,p)	ORCA	2021	None	Water	GD3	Yes	Yes	Yes	Tight	Fine
S052	M06-2X	6-31G(d,p)	Gaussian 16	09	SMD	Water	D3	Yes	Yes	Yes	Tight	UltraFine
S053	CAM-B3LYP	6-31G(d,p)	ORCA	2022	None	Chloroform	None	Yes	Yes	No	Tight	Coarse
S054	ωB97X-D	LANL2DZ	Gaussian 16	2023	SMD	Chloroform	D3	Yes	No	No	Tight	Fine
S055	B3LYP	6-31G(d,p)	Gaussian 16	2022	SMD	Water	D3	Yes	Yes	No	Very Tight	UltraFine
S056	CAM-B3LYP	6-31G(d,p)	ORCA	2023	CPCM	Methanol	D3BJ	Yes	No	Yes	Default	Fine
S057	B3LYP	6-31G(d,p)	ORCA	16	IEF-PCM	DMSO	None	Yes	Yes	Yes	Tight	UltraFine
S058	B3LYP	6-31G(d,p)	GAMESS	2022	None	Chloroform	D3	Yes	Yes	Yes	Default	Fine
S059	B3LYP	6-31+G(d,p)	ORCA	16	PCM	DMSO	D3	Yes	Yes	No	Very Tight	Coarse
S060	B3LYP	LANL2DZ	Gaussian 09	2021	IEF-PCM	Gas Phase	D3	Yes	No	No	Default	Fine
S061	B3LYP	6-31G(d,p)	Gaussian 16	09	SMD	Methanol	None	Yes	Yes	Yes	Default	Fine
S062	B3LYP	6-31G(d,p)	Gaussian 16	2023	IEF-PCM	Chloroform	GD3	Yes	Yes	No	Very Tight	UltraFine
S063	M06-2X	6-31G(d,p)	Gaussian 16	09	PCM	Methanol	D3BJ	Yes	Yes	No	Very Tight	Fine
S064	B3LYP	6-31G(d,p)	Gaussian 16	16	CPCM	Water	None	Yes	Yes	Yes	Default	Fine
S065	B3LYP	6-31G(d,p)	Q-Chem	2023	None	Water	None	Yes	Yes	No	Tight	Fine
S066	B3LYP	6-31G(d,p)	Gaussian 16	09	CPCM	Chloroform	None	Yes	Yes	No	Tight	Fine
S067	B3LYP	6-31G(d,p)	GAMESS	2022	PCM	DMSO	D3	Yes	Yes	Yes	Default	Fine
S068	M06-2X	6-31G(d,p)	ORCA	5.0	PCM	Methanol	D3	Yes	Yes	Yes	Tight	Fine
S069	B3LYP	6-31G(d,p)	GAMESS	16	None	Water	D3BJ	Yes	Yes	Yes	Default	Fine
S070	B3LYP-D3	cc-pVTZ	Gaussian 09	09	SMD	DMSO	D3BJ	Yes	Yes	Yes	Tight	Fine
S071	M06-2X	6-31G(d,p)	Gaussian 09	16	IEF-PCM	Water	D3BJ	Yes	Yes	Yes	Tight	UltraFine
S072	B3LYP	6-31G(d,p)	Gaussian 09	16	CPCM	DMSO	None	Yes	No	Yes	Tight	Fine
S073	B3LYP	6-31G(d,p)	Gaussian 16	2023	SMD	DMSO	D3BJ	Yes	Yes	No	Tight	Fine
S074	M06-2X	6-31+G(d,p)	ORCA	2023	CPCM	DMSO	D3BJ	Yes	Yes	Yes	Very Tight	Fine
S075	M06-2X	6-31G(d,p)	Gaussian 16	5.0	PCM	DMSO	None	Yes	Yes	Yes	Default	Fine
S076	M06-2X	6-31G(d,p)	Gaussian 16	2022	CPCM	DMSO	D3BJ	Yes	Yes	Yes	Default	UltraFine
S077	M06-2X	6-311G(d,p)	ORCA	16	None	Water	None	Yes	Yes	Yes	Default	Fine
S078	B3LYP	6-31G(d,p)	Gaussian 16	09	SMD	Methanol	None	Yes	Yes	No	Tight	Fine
S079	B3LYP	6-311G(d,p)	VASP	2021	PCM	Water	D3	Yes	Yes	Yes	Default	UltraFine
S080	B3LYP	6-31G(d,p)	VASP	16	IEF-PCM	DMSO	None	Yes	Yes	Yes	Default	UltraFine
S081	ωB97X-D	6-31G(d,p)	VASP	16	SMD	DMSO	None	Yes	Yes	Yes	Default	Fine

## Sheet: Application_Domain
Study_ID	Therapeutic_Area	Specific_Disease	Target_Class	Specific_Target	Compound_Class	Number_of_Compounds	Activity_Assay	Experimental_Validation	In_Vivo_Data
S001	Metabolic Disorder	Hypertension	Enzyme	Target_1	Synthetic Organic	13	Ki	No	Yes
S002	Cardiovascular	Hypertension	Receptor	Target_2	Natural Product	31	Multiple	No	No
S003	Infectious Disease	Bacterial Infection	Enzyme	Target_3	Natural Product	41	Binding Affinity	Yes	No
S004	Metabolic Disorder	Other	DNA/RNA	Target_4	Natural Product	11	IC50	No	No
S005	Metabolic Disorder	Breast Cancer	Enzyme	Target_5	Synthetic Organic	4	Binding Affinity	No	Yes
S006	Cancer	Malaria	Receptor	Target_6	Synthetic Organic	34	Ki	Yes	No
S007	Infectious Disease	COVID-19	Enzyme	Target_7	Metal Complex	38	Ki	Yes	No
S008	Infectious Disease	COVID-19	Viral Protein	Target_8	Synthetic Organic	46	Binding Affinity	Yes	No
S009	Neurodegenerative	Alzheimer	Enzyme	Target_9	Natural Product	4	Multiple	No	No
S010	Other	Bacterial Infection	Viral Protein	Target_10	Synthetic Organic	38	Multiple	No	No
S011	Metabolic Disorder	COVID-19	Enzyme	Target_11	Synthetic Organic	19	None	No	No
S012	Cancer	Other	Enzyme	Target_12	Natural Product	6	Ki	Yes	No
S013	Metabolic Disorder	Breast Cancer	Enzyme	Target_13	Natural Product	34	MIC	Yes	No
S014	Cancer	Bacterial Infection	Enzyme	Target_14	Natural Product	18	None	No	No
S015	Cancer	Breast Cancer	Receptor	Target_15	Synthetic Organic	13	Multiple	No	No
S016	Infectious Disease	Other	Enzyme	Target_16	Synthetic Organic	41	Binding Affinity	No	No
S017	Neurodegenerative	COVID-19	Ion Channel	Target_17	Synthetic Organic	23	Multiple	Yes	No
S018	Cancer	COVID-19	Enzyme	Target_18	Metal Complex	19	Binding Affinity	No	No
S019	Neurodegenerative	Alzheimer	Enzyme	Target_19	Metal Complex	45	None	No	Yes
S020	Infectious Disease	COVID-19	Receptor	Target_20	Synthetic Organic	11	Ki	No	No
S021	Infectious Disease	Bacterial Infection	Viral Protein	Target_21	Metal Complex	1	Multiple	No	No
S022	Infectious Disease	Other	Enzyme	Target_22	Natural Product	24	Binding Affinity	No	No
S023	Cancer	Hypertension	Viral Protein	Target_23	Natural Product	7	Ki	No	No
S024	Cardiovascular	Other	Viral Protein	Target_24	Natural Product	25	MIC	Yes	No
S025	Infectious Disease	Bacterial Infection	Enzyme	Target_25	Natural Product	21	Binding Affinity	Yes	No
S026	Neurodegenerative	Bacterial Infection	Unknown	Target_26	Synthetic Organic	15	None	No	No
S027	Cancer	Alzheimer	Ion Channel	Target_27	Peptide	1	MIC	No	Yes
S028	Neurodegenerative	Alzheimer	Viral Protein	Target_28	Natural Product	12	MIC	Yes	No
S029	Infectious Disease	COVID-19	Enzyme	Target_29	Natural Product	7	IC50	Yes	No
S030	Neurodegenerative	Diabetes	Viral Protein	Target_30	Synthetic Organic	15	Multiple	Yes	No
S031	Metabolic Disorder	Other	Enzyme	Target_31	Peptide	21	Binding Affinity	No	No
S032	Infectious Disease	Other	Enzyme	Target_32	Synthetic Organic	19	MIC	Yes	No
S033	Infectious Disease	Diabetes	Enzyme	Target_33	Synthetic Organic	29	IC50	Yes	No
S034	Neurodegenerative	Alzheimer	Enzyme	Target_34	Natural Product	25	None	Yes	No
S035	Other	COVID-19	Receptor	Target_35	Natural Product	33	Ki	Yes	Yes
S036	Infectious Disease	Diabetes	Viral Protein	Target_36	Repurposed Drug	49	Binding Affinity	Yes	No
S037	Metabolic Disorder	COVID-19	Viral Protein	Target_37	Repurposed Drug	32	MIC	No	No
S038	Cardiovascular	COVID-19	Enzyme	Target_38	Natural Product	49	Multiple	Yes	No
S039	Neurodegenerative	COVID-19	Enzyme	Target_39	Repurposed Drug	35	IC50	No	No
S040	Other	Malaria	Enzyme	Target_40	Synthetic Organic	44	MIC	Yes	No
S041	Metabolic Disorder	Bacterial Infection	Unknown	Target_41	Metal Complex	38	Multiple	No	No
S042	Cancer	COVID-19	Enzyme	Target_42	Synthetic Organic	26	MIC	No	No
S043	Infectious Disease	Malaria	Receptor	Target_43	Synthetic Organic	11	Binding Affinity	No	No
S044	Infectious Disease	Alzheimer	Viral Protein	Target_44	Synthetic Organic	35	Binding Affinity	No	Yes
S045	Metabolic Disorder	Diabetes	Enzyme	Target_45	Synthetic Organic	8	Binding Affinity	Yes	No
S046	Metabolic Disorder	Bacterial Infection	Viral Protein	Target_46	Natural Product	46	None	Yes	Yes
S047	Infectious Disease	Hypertension	Enzyme	Target_47	Natural Product	14	None	No	Yes
S048	Neurodegenerative	Diabetes	Receptor	Target_48	Synthetic Organic	10	IC50	No	Yes
S049	Metabolic Disorder	Bacterial Infection	DNA/RNA	Target_49	Synthetic Organic	2	Binding Affinity	No	No
S050	Cancer	Hypertension	Enzyme	Target_50	Natural Product	46	Multiple	No	No
S051	Cancer	Diabetes	Enzyme	Target_51	Synthetic Organic	9	MIC	No	No
S052	Cancer	Bacterial Infection	Viral Protein	Target_52	Repurposed Drug	3	Ki	No	No
S053	Infectious Disease	Diabetes	DNA/RNA	Target_53	Natural Product	21	Multiple	Yes	No
S054	Infectious Disease	Diabetes	Enzyme	Target_54	Synthetic Organic	26	None	No	No
S055	Infectious Disease	Hypertension	Viral Protein	Target_55	Synthetic Organic	8	None	No	No
S056	Infectious Disease	Diabetes	Viral Protein	Target_56	Metal Complex	48	Multiple	Yes	Yes
S057	Cancer	Diabetes	Viral Protein	Target_57	Natural Product	2	None	No	No
S058	Cancer	Hypertension	Enzyme	Target_58	Synthetic Organic	6	Binding Affinity	Yes	No
S059	Infectious Disease	Alzheimer	Viral Protein	Target_59	Metal Complex	28	IC50	No	No
S060	Metabolic Disorder	COVID-19	DNA/RNA	Target_60	Peptide	29	MIC	Yes	No
S061	Infectious Disease	Other	Enzyme	Target_61	Synthetic Organic	26	IC50	No	No
S062	Cardiovascular	Breast Cancer	Enzyme	Target_62	Synthetic Organic	25	MIC	No	Yes
S063	Other	Malaria	Ion Channel	Target_63	Synthetic Organic	12	MIC	Yes	No
S064	Infectious Disease	Breast Cancer	Enzyme	Target_64	Metal Complex	5	IC50	No	No
S065	Cancer	Breast Cancer	Receptor	Target_65	Synthetic Organic	34	Multiple	No	Yes
S066	Infectious Disease	Bacterial Infection	Enzyme	Target_66	Natural Product	48	MIC	No	No
S067	Cancer	COVID-19	Enzyme	Target_67	Peptide	37	IC50	Yes	Yes
S068	Cancer	Bacterial Infection	Receptor	Target_68	Synthetic Organic	15	MIC	Yes	No
S069	Infectious Disease	COVID-19	Enzyme	Target_69	Synthetic Organic	44	Ki	Yes	No
S070	Cancer	Hypertension	Enzyme	Target_70	Natural Product	36	Multiple	No	No
S071	Infectious Disease	Hypertension	Enzyme	Target_71	Synthetic Organic	15	Binding Affinity	No	Yes
S072	Infectious Disease	Other	Viral Protein	Target_72	Synthetic Organic	43	MIC	No	Yes
S073	Metabolic Disorder	COVID-19	Enzyme	Target_73	Synthetic Organic	48	Ki	No	No
S074	Infectious Disease	Diabetes	Enzyme	Target_74	Natural Product	23	Binding Affinity	No	Yes
S075	Cancer	Alzheimer	Ion Channel	Target_75	Synthetic Organic	6	Binding Affinity	No	No
S076	Cancer	Other	Enzyme	Target_76	Repurposed Drug	46	MIC	Yes	Yes
S077	Other	Other	Viral Protein	Target_77	Natural Product	44	IC50	No	No
S078	Infectious Disease	Diabetes	Enzyme	Target_78	Repurposed Drug	43	MIC	Yes	No
S079	Cancer	Alzheimer	Receptor	Target_79	Synthetic Organic	45	Ki	No	No
S080	Metabolic Disorder	Bacterial Infection	Enzyme	Target_80	Peptide	21	Binding Affinity	No	No
S081	Cancer	Alzheimer	Ion Channel	Target_81	Metal Complex	23	MIC	No	No

## Sheet: Integration_Methods
Study_ID	Molecular_Docking	Docking_Software	Molecular_Dynamics	MD_Software	MD_Simulation_Time	ADMET_Prediction	ADMET_Tool	QSAR_Modeling	Machine_Learning	ML_Method
S001	Yes	AutoDock Vina	Yes	GROMACS	50 ns	No	SwissADME	No	No	N/A
S002	Yes	AutoDock Vina	No	NAMD	50 ns	Yes	SwissADME	Yes	No	N/A
S003	Yes	AutoDock Vina	No	GROMACS	50 ns	No	SwissADME	No	No	N/A
S004	Yes	MOE	No	GROMACS	100 ns	No	SwissADME	No	No	Neural Network
S005	No	AutoDock Vina	Yes	NAMD	500 ns	No	SwissADME	Yes	No	N/A
S006	Yes	Glide	No	AMBER	N/A	Yes	ADMET Predictor	Yes	No	N/A
S007	Yes	AutoDock 4	No	GROMACS	200 ns	No	SwissADME	No	Yes	N/A
S008	Yes	AutoDock Vina	No	AMBER	N/A	Yes	SwissADME	No	No	N/A
S009	Yes	AutoDock Vina	Yes	GROMACS	200 ns	No	SwissADME	Yes	No	N/A
S010	No	AutoDock Vina	No	GROMACS	100 ns	Yes	SwissADME	No	No	Deep Learning
S011	Yes	AutoDock 4	Yes	GROMACS	50 ns	Yes	Molinspiration	No	No	N/A
S012	Yes	Glide	No	GROMACS	100 ns	No	SwissADME	No	No	N/A
S013	Yes	AutoDock 4	Yes	AMBER	100 ns	Yes	pkCSM	No	No	N/A
S014	Yes	AutoDock 4	No	GROMACS	10 ns	No	Molinspiration	No	Yes	N/A
S015	Yes	AutoDock Vina	No	GROMACS	500 ns	No	ADMET Predictor	No	No	N/A
S016	Yes	MOE	Yes	AMBER	200 ns	No	pkCSM	No	No	Neural Network
S017	Yes	Glide	Yes	AMBER	50 ns	Yes	ADMET Predictor	No	No	N/A
S018	Yes	AutoDock Vina	Yes	GROMACS	200 ns	No	Molinspiration	No	Yes	N/A
S019	Yes	MOE	No	AMBER	N/A	Yes	pkCSM	No	No	Neural Network
S020	Yes	AutoDock 4	No	GROMACS	200 ns	Yes	pkCSM	Yes	No	N/A
S021	Yes	AutoDock 4	No	AMBER	N/A	No	pkCSM	No	No	N/A
S022	Yes	Glide	No	AMBER	500 ns	Yes	pkCSM	No	No	N/A
S023	Yes	Glide	No	Desmond	N/A	Yes	pkCSM	No	No	N/A
S024	No	AutoDock 4	No	GROMACS	200 ns	No	SwissADME	No	No	N/A
S025	No	AutoDock Vina	No	GROMACS	200 ns	Yes	SwissADME	No	No	N/A
S026	No	AutoDock Vina	No	GROMACS	N/A	Yes	SwissADME	Yes	No	N/A
S027	Yes	GOLD	No	GROMACS	100 ns	No	SwissADME	No	Yes	N/A
S028	Yes	AutoDock Vina	No	GROMACS	500 ns	Yes	SwissADME	Yes	No	N/A
S029	Yes	AutoDock Vina	Yes	NAMD	10 ns	No	SwissADME	No	Yes	SVM
S030	Yes	AutoDock Vina	No	GROMACS	50 ns	No	pkCSM	No	No	N/A
S031	No	AutoDock Vina	No	GROMACS	200 ns	No	SwissADME	No	Yes	N/A
S032	Yes	AutoDock 4	No	AMBER	50 ns	No	ADMET Predictor	No	No	N/A
S033	Yes	MOE	Yes	GROMACS	10 ns	Yes	SwissADME	No	No	SVM
S034	Yes	AutoDock Vina	No	AMBER	50 ns	Yes	SwissADME	No	No	N/A
S035	Yes	AutoDock Vina	No	GROMACS	10 ns	No	ADMET Predictor	No	Yes	N/A
S036	Yes	AutoDock Vina	No	GROMACS	N/A	No	pkCSM	Yes	No	N/A
S037	Yes	GOLD	Yes	GROMACS	100 ns	Yes	SwissADME	No	Yes	N/A
S038	Yes	AutoDock 4	No	GROMACS	200 ns	Yes	ADMET Predictor	Yes	No	Random Forest
S039	Yes	AutoDock Vina	No	NAMD	10 ns	Yes	ADMET Predictor	No	No	N/A
S040	Yes	Glide	No	GROMACS	50 ns	Yes	SwissADME	No	No	N/A
S041	No	Glide	No	GROMACS	200 ns	No	SwissADME	Yes	No	Random Forest
S042	No	Glide	No	GROMACS	100 ns	Yes	Molinspiration	No	No	N/A
S043	No	GOLD	No	GROMACS	N/A	No	pkCSM	No	Yes	N/A
S044	No	AutoDock Vina	Yes	NAMD	200 ns	No	pkCSM	No	No	Random Forest
S045	Yes	Glide	No	GROMACS	10 ns	Yes	ADMET Predictor	No	No	N/A
S046	Yes	AutoDock Vina	No	AMBER	100 ns	No	SwissADME	Yes	No	N/A
S047	Yes	Glide	Yes	Desmond	50 ns	Yes	SwissADME	No	Yes	N/A
S048	Yes	Glide	Yes	GROMACS	100 ns	No	SwissADME	No	No	Random Forest
S049	No	Glide	Yes	NAMD	100 ns	No	ADMET Predictor	No	No	N/A
S050	Yes	AutoDock 4	No	GROMACS	500 ns	No	pkCSM	No	No	N/A
S051	No	AutoDock Vina	No	GROMACS	100 ns	No	pkCSM	No	No	N/A
S052	Yes	AutoDock 4	No	GROMACS	100 ns	Yes	SwissADME	No	No	N/A
S053	Yes	None	No	AMBER	200 ns	Yes	SwissADME	Yes	Yes	N/A
S054	Yes	GOLD	No	None	50 ns	No	SwissADME	No	Yes	N/A
S055	No	AutoDock Vina	Yes	GROMACS	200 ns	Yes	ADMET Predictor	No	No	N/A
S056	Yes	AutoDock Vina	Yes	AMBER	200 ns	Yes	SwissADME	Yes	No	N/A
S057	Yes	AutoDock Vina	No	GROMACS	10 ns	Yes	SwissADME	No	No	N/A
S058	Yes	Glide	Yes	GROMACS	200 ns	No	ADMET Predictor	Yes	No	N/A
S059	Yes	Glide	Yes	GROMACS	500 ns	Yes	SwissADME	No	Yes	N/A
S060	Yes	AutoDock Vina	No	Desmond	500 ns	No	Molinspiration	No	Yes	N/A
S061	Yes	AutoDock 4	No	AMBER	10 ns	No	SwissADME	No	No	N/A
S062	Yes	Glide	No	GROMACS	N/A	Yes	pkCSM	Yes	No	N/A
S063	Yes	Glide	No	GROMACS	50 ns	Yes	SwissADME	No	No	N/A
S064	Yes	AutoDock 4	No	GROMACS	50 ns	Yes	PreADMET	No	No	N/A
S065	Yes	AutoDock 4	No	GROMACS	200 ns	No	SwissADME	No	No	N/A
S066	Yes	AutoDock 4	No	GROMACS	200 ns	Yes	SwissADME	No	Yes	N/A
S067	Yes	AutoDock Vina	No	NAMD	N/A	Yes	SwissADME	No	No	N/A
S068	Yes	AutoDock 4	Yes	GROMACS	200 ns	Yes	SwissADME	No	Yes	Random Forest
S069	Yes	AutoDock 4	No	GROMACS	50 ns	No	SwissADME	No	No	Random Forest
S070	No	Glide	No	GROMACS	100 ns	Yes	PreADMET	No	No	N/A
S071	Yes	AutoDock 4	No	NAMD	500 ns	No	SwissADME	No	No	N/A
S072	Yes	Glide	No	AMBER	100 ns	No	ADMET Predictor	No	No	N/A
S073	Yes	AutoDock Vina	No	GROMACS	100 ns	Yes	pkCSM	No	No	N/A
S074	Yes	AutoDock Vina	Yes	AMBER	50 ns	No	pkCSM	No	No	N/A
S075	No	AutoDock Vina	No	GROMACS	100 ns	Yes	SwissADME	Yes	No	Random Forest
S076	Yes	AutoDock Vina	Yes	GROMACS	N/A	No	SwissADME	Yes	Yes	N/A
S077	Yes	Glide	Yes	GROMACS	10 ns	No	ADMET Predictor	Yes	No	N/A
S078	Yes	None	Yes	GROMACS	200 ns	No	Molinspiration	Yes	Yes	N/A
S079	Yes	AutoDock Vina	No	GROMACS	10 ns	Yes	SwissADME	No	Yes	N/A
S080	Yes	AutoDock Vina	Yes	NAMD	500 ns	Yes	SwissADME	No	No	N/A
S081	Yes	Glide	No	AMBER	200 ns	Yes	SwissADME	No	No	Random Forest

## Sheet: DFT_Descriptors
Study_ID	E_HOMO	E_LUMO	Energy_Gap	Dipole_Moment	Electrophilicity_Index	Chemical_Hardness	Chemical_Softness	Electronegativity	Fukui_Functions	MEP	Polarizability	NBO_Analysis	AIM_Analysis	ELF_Analysis
S001	Yes	Yes	Yes	Yes	No	Yes	Yes	Yes	No	No	Yes	No	No	No
S002	Yes	Yes	Yes	Yes	Yes	Yes	Yes	No	No	Yes	No	Yes	No	No
S003	Yes	Yes	Yes	Yes	No	Yes	No	Yes	Yes	No	Yes	No	No	No
S004	Yes	Yes	Yes	Yes	No	Yes	No	Yes	Yes	No	No	No	No	No
S005	Yes	Yes	Yes	Yes	No	No	Yes	No	Yes	No	No	No	No	No
S006	Yes	Yes	Yes	Yes	No	Yes	No	Yes	Yes	Yes	Yes	No	No	Yes
S007	Yes	Yes	Yes	Yes	Yes	No	Yes	Yes	Yes	No	No	No	No	No
S008	Yes	Yes	Yes	Yes	No	No	No	Yes	Yes	No	No	No	No	No
S009	Yes	Yes	Yes	No	Yes	No	No	Yes	Yes	No	No	No	No	Yes
S010	Yes	Yes	No	Yes	No	No	No	No	No	Yes	No	Yes	No	Yes
S011	Yes	Yes	Yes	Yes	Yes	No	No	Yes	No	No	No	No	No	No
S012	Yes	Yes	No	Yes	No	Yes	Yes	Yes	No	Yes	No	No	No	No
S013	Yes	Yes	Yes	No	No	Yes	No	Yes	No	No	No	No	No	No
S014	Yes	Yes	Yes	Yes	Yes	Yes	No	Yes	Yes	Yes	No	No	No	No
S015	Yes	Yes	Yes	No	Yes	Yes	Yes	Yes	Yes	No	Yes	No	No	No
S016	Yes	Yes	Yes	Yes	No	No	No	Yes	Yes	Yes	No	No	No	Yes
S017	Yes	Yes	Yes	Yes	Yes	Yes	Yes	Yes	Yes	No	No	No	No	No
S018	Yes	Yes	Yes	Yes	Yes	No	No	No	No	No	No	No	No	No
S019	Yes	Yes	Yes	No	Yes	No	Yes	Yes	Yes	No	Yes	No	No	No
S020	Yes	Yes	Yes	Yes	Yes	Yes	Yes	Yes	Yes	Yes	No	No	No	No
S021	Yes	Yes	Yes	No	No	No	No	Yes	Yes	Yes	Yes	Yes	No	Yes
S022	Yes	Yes	Yes	No	Yes	Yes	No	No	No	No	No	No	No	No
S023	Yes	Yes	Yes	Yes	Yes	Yes	Yes	No	No	Yes	No	No	No	No
S024	Yes	Yes	Yes	Yes	Yes	No	Yes	Yes	No	No	Yes	No	No	No
S025	Yes	Yes	Yes	No	Yes	Yes	No	No	Yes	No	No	No	No	No
S026	Yes	Yes	Yes	Yes	Yes	No	Yes	Yes	No	No	No	No	No	No
S027	Yes	Yes	Yes	Yes	Yes	Yes	Yes	Yes	No	Yes	No	No	No	No
S028	Yes	Yes	Yes	Yes	Yes	Yes	No	Yes	No	No	No	No	Yes	No
S029	Yes	Yes	Yes	Yes	Yes	No	No	Yes	No	No	Yes	Yes	No	No
S030	Yes	Yes	Yes	No	No	Yes	Yes	No	Yes	Yes	Yes	Yes	No	No
S031	Yes	Yes	Yes	No	Yes	Yes	No	Yes	No	No	Yes	No	No	No
S032	Yes	Yes	Yes	Yes	No	Yes	No	Yes	No	Yes	No	No	No	No
S033	Yes	Yes	Yes	Yes	Yes	No	No	No	Yes	Yes	Yes	No	No	No
S034	Yes	Yes	Yes	Yes	Yes	Yes	No	Yes	No	Yes	No	No	No	No
S035	Yes	Yes	Yes	No	No	Yes	Yes	Yes	No	Yes	Yes	No	No	No
S036	Yes	Yes	Yes	Yes	Yes	Yes	Yes	Yes	Yes	No	No	No	No	No
S037	Yes	Yes	Yes	Yes	No	Yes	Yes	Yes	No	Yes	No	Yes	No	No
S038	Yes	Yes	Yes	Yes	No	No	No	Yes	No	Yes	No	No	No	No
S039	Yes	Yes	Yes	Yes	Yes	No	Yes	Yes	No	Yes	Yes	No	No	No
S040	Yes	Yes	Yes	No	No	Yes	No	Yes	Yes	No	No	Yes	No	No
S041	Yes	Yes	Yes	Yes	Yes	No	Yes	Yes	No	No	No	No	No	No
S042	Yes	Yes	Yes	Yes	Yes	Yes	Yes	No	Yes	Yes	Yes	Yes	No	No
S043	Yes	Yes	Yes	Yes	Yes	No	No	Yes	No	Yes	Yes	Yes	No	No
S044	Yes	Yes	Yes	No	Yes	No	Yes	Yes	Yes	No	No	No	Yes	No
S045	Yes	Yes	Yes	Yes	No	Yes	Yes	Yes	No	Yes	No	Yes	No	No
S046	Yes	Yes	Yes	Yes	No	No	No	Yes	No	Yes	No	No	No	No
S047	Yes	Yes	Yes	Yes	No	No	Yes	Yes	No	Yes	No	No	No	Yes
S048	Yes	Yes	Yes	No	Yes	Yes	No	Yes	No	No	No	No	No	No
S049	Yes	Yes	Yes	Yes	Yes	Yes	No	Yes	No	Yes	No	No	No	No
S050	Yes	Yes	Yes	Yes	Yes	Yes	Yes	No	No	Yes	No	No	No	Yes
S051	Yes	Yes	Yes	Yes	No	No	No	Yes	Yes	Yes	No	No	No	No
S052	Yes	Yes	Yes	Yes	Yes	No	Yes	No	No	No	No	No	No	No
S053	Yes	Yes	Yes	Yes	No	No	Yes	Yes	Yes	Yes	No	Yes	No	No
S054	Yes	Yes	Yes	No	Yes	No	Yes	No	No	No	Yes	No	No	No
S055	Yes	Yes	Yes	Yes	Yes	No	Yes	Yes	Yes	Yes	No	Yes	No	No
S056	Yes	Yes	Yes	Yes	No	No	No	No	No	Yes	Yes	No	No	Yes
S057	Yes	Yes	Yes	Yes	No	No	Yes	Yes	No	No	No	Yes	No	No
S058	Yes	Yes	Yes	Yes	Yes	Yes	No	Yes	No	Yes	No	No	No	No
S059	Yes	Yes	Yes	Yes	No	Yes	No	Yes	Yes	No	No	No	No	No
S060	Yes	Yes	Yes	No	Yes	No	No	No	No	No	Yes	No	No	Yes
S061	Yes	Yes	Yes	Yes	No	Yes	Yes	Yes	No	No	No	No	No	No
S062	Yes	Yes	Yes	Yes	Yes	No	Yes	Yes	No	Yes	No	No	No	Yes
S063	Yes	Yes	Yes	Yes	No	Yes	No	Yes	Yes	No	Yes	Yes	No	No
S064	Yes	Yes	Yes	Yes	No	Yes	Yes	Yes	No	Yes	Yes	No	No	No
S065	Yes	Yes	Yes	Yes	Yes	No	Yes	Yes	No	No	Yes	No	No	No
S066	Yes	Yes	Yes	Yes	Yes	Yes	Yes	Yes	No	No	Yes	No	No	No
S067	Yes	Yes	Yes	No	No	Yes	Yes	No	No	No	Yes	No	No	No
S068	Yes	Yes	Yes	Yes	Yes	Yes	No	No	No	Yes	Yes	No	Yes	No
S069	Yes	Yes	Yes	Yes	No	No	Yes	No	Yes	No	Yes	No	No	No
S070	Yes	Yes	Yes	No	Yes	Yes	Yes	Yes	Yes	Yes	No	No	No	No
S071	Yes	Yes	Yes	Yes	No	No	Yes	No	Yes	No	No	Yes	No	No
S072	Yes	Yes	Yes	Yes	No	Yes	No	No	Yes	Yes	No	Yes	No	No
S073	Yes	Yes	Yes	Yes	No	No	No	Yes	No	Yes	No	Yes	No	No
S074	Yes	Yes	Yes	Yes	Yes	No	Yes	Yes	No	No	No	No	No	Yes
S075	Yes	Yes	Yes	Yes	No	Yes	No	Yes	Yes	No	No	No	No	No
S076	Yes	Yes	Yes	Yes	Yes	Yes	No	No	No	Yes	No	No	No	No
S077	Yes	Yes	Yes	Yes	Yes	Yes	No	Yes	Yes	No	No	No	No	No
S078	Yes	Yes	Yes	Yes	No	No	No	Yes	No	Yes	No	No	Yes	No
S079	Yes	Yes	Yes	Yes	No	Yes	Yes	Yes	No	Yes	Yes	No	No	Yes
S080	Yes	Yes	Yes	Yes	No	Yes	Yes	No	Yes	Yes	Yes	No	No	No
S081	Yes	Yes	Yes	Yes	Yes	Yes	Yes	No	Yes	Yes	No	Yes	No	No

## Sheet: Quality_Assessment
Study_ID	Methodological_Transparency	Validation_Approach	Reproducibility	Statistical_Rigor	Total_Score	Quality_Category
S001	3	2	2	0	7	High
S002	2	3	2	0	7	High
S003	3	3	0	2	8	High
S004	3	0	2	1	6	Moderate
S005	2	2	1	1	6	Moderate
S006	3	2	2	0	7	High
S007	3	2	1	1	7	High
S008	2	2	2	0	6	Moderate
S009	3	2	0	2	7	High
S010	3	2	2	2	9	High
S011	1	1	1	1	4	Moderate
S012	2	3	2	2	9	High
S013	2	1	2	1	6	Moderate
S014	3	2	2	2	9	High
S015	3	2	2	2	9	High
S016	3	2	2	1	8	High
S017	3	3	1	2	9	High
S018	3	3	1	1	8	High
S019	1	3	1	1	6	Moderate
S020	2	2	2	0	6	Moderate
S021	2	2	2	1	7	High
S022	2	2	1	2	7	High
S023	3	3	2	2	10	High
S024	3	2	2	1	8	High
S025	2	3	2	2	9	High
S026	3	3	1	2	9	High
S027	3	2	0	0	5	Moderate
S028	2	1	1	1	5	Moderate
S029	1	1	2	0	4	Moderate
S030	2	3	1	1	7	High
S031	1	1	1	2	5	Moderate
S032	3	3	2	0	8	High
S033	1	2	2	2	7	High
S034	2	2	2	1	7	High
S035	2	3	1	1	7	High
S036	3	2	1	1	7	High
S037	1	2	2	1	6	Moderate
S038	1	2	1	0	4	Moderate
S039	0	2	0	1	3	Low
S040	1	3	1	0	5	Moderate
S041	2	1	1	1	5	Moderate
S042	3	3	1	0	7	High
S043	2	3	1	2	8	High
S044	0	1	1	1	3	Low
S045	3	2	0	1	6	Moderate
S046	2	2	2	1	7	High
S047	2	1	1	1	5	Moderate
S048	2	3	2	2	9	High
S049	3	0	1	0	4	Moderate
S050	1	1	1	1	4	Moderate
S051	3	2	2	2	9	High
S052	3	2	1	0	6	Moderate
S053	1	2	1	0	4	Moderate
S054	3	3	1	1	8	High
S055	2	2	2	0	6	Moderate
S056	1	2	1	1	5	Moderate
S057	3	0	1	1	5	Moderate
S058	3	2	2	2	9	High
S059	3	1	1	2	7	High
S060	1	1	1	1	4	Moderate
S061	2	2	1	1	6	Moderate
S062	3	1	2	2	8	High
S063	2	1	1	1	5	Moderate
S064	2	1	0	2	5	Moderate
S065	0	3	1	2	6	Moderate
S066	1	3	2	2	8	High
S067	3	2	0	1	6	Moderate
S068	2	3	2	1	8	High
S069	3	3	1	1	8	High
S070	2	2	2	2	8	High
S071	3	0	2	0	5	Moderate
S072	2	3	1	2	8	High
S073	2	2	1	1	6	Moderate
S074	1	2	1	0	4	Moderate
S075	2	3	1	0	6	Moderate
S076	2	2	2	0	6	Moderate
S077	3	2	1	1	7	High
S078	3	3	1	1	8	High
S079	1	2	1	2	6	Moderate
S080	0	2	2	1	5	Moderate
S081	1	2	1	0	4	Moderate

## Sheet: Extraction_Notes
Study_ID	Extraction_Date	Extractor	Verification_Status	Notes	Queries
S001	2025-01-01	Reviewer B	Verified
S002	2025-01-02	Reviewer B	Verified
S003	2025-01-03	Reviewer B	Verified
S004	2025-01-04	Reviewer A	Verified
S005	2025-01-05	Reviewer C	Verified
S006	2025-01-06	Reviewer A	Verified
S007	2025-01-07	Reviewer B	Verified
S008	2025-01-08	Reviewer B	Pending
S009	2025-01-09	Reviewer C	Verified
S010	2025-01-10	Reviewer A	Verified
S011	2025-01-11	Reviewer B	Verified
S012	2025-01-12	Reviewer C	Verified
S013	2025-01-13	Reviewer A	Verified
S014	2025-01-14	Reviewer A	Verified
S015	2025-01-15	Reviewer B	Disputed
S016	2025-01-16	Reviewer B	Verified
S017	2025-01-17	Reviewer A	Verified
S018	2025-01-18	Reviewer A	Verified
S019	2025-01-19	Reviewer B	Verified
S020	2025-01-20	Reviewer A	Verified
S021	2025-01-21	Reviewer B	Verified
S022	2025-01-22	Reviewer A	Verified
S023	2025-01-23	Reviewer B	Verified
S024	2025-01-24	Reviewer C	Verified
S025	2025-01-25	Reviewer B	Verified
S026	2025-01-26	Reviewer B	Verified
S027	2025-01-27	Reviewer C	Verified
S028	2025-01-28	Reviewer A	Verified
S029	2025-01-29	Reviewer C	Verified
S030	2025-01-30	Reviewer B	Pending
S031	2025-01-31	Reviewer A	Verified
S032	2025-02-01	Reviewer C	Verified
S033	2025-02-02	Reviewer A	Pending
S034	2025-02-03	Reviewer A	Verified
S035	2025-02-04	Reviewer C	Verified
S036	2025-02-05	Reviewer A	Verified
S037	2025-02-06	Reviewer C	Verified
S038	2025-02-07	Reviewer B	Verified
S039	2025-02-08	Reviewer A	Verified
S040	2025-02-09	Reviewer B	Verified
S041	2025-02-10	Reviewer B	Verified
S042	2025-02-11	Reviewer A	Pending
S043	2025-02-12	Reviewer C	Verified
S044	2025-02-13	Reviewer A	Pending
S045	2025-02-14	Reviewer B	Verified
S046	2025-02-15	Reviewer B	Verified
S047	2025-02-16	Reviewer C	Verified
S048	2025-02-17	Reviewer A	Verified
S049	2025-02-18	Reviewer B	Verified
S050	2025-02-19	Reviewer B	Verified
S051	2025-02-20	Reviewer B	Verified
S052	2025-02-21	Reviewer C	Pending
S053	2025-02-22	Reviewer B	Verified
S054	2025-02-23	Reviewer B	Verified
S055	2025-02-24	Reviewer A	Verified
S056	2025-02-25	Reviewer A	Verified
S057	2025-02-26	Reviewer B	Verified
S058	2025-02-27	Reviewer B	Verified
S059	2025-02-28	Reviewer A	Verified
S060	2025-03-01	Reviewer C	Disputed
S061	2025-03-02	Reviewer C	Verified
S062	2025-03-03	Reviewer C	Verified
S063	2025-03-04	Reviewer C	Verified
S064	2025-03-05	Reviewer C	Verified
S065	2025-03-06	Reviewer C	Verified
S066	2025-03-07	Reviewer C	Verified
S067	2025-03-08	Reviewer C	Pending
S068	2025-03-09	Reviewer A	Verified
S069	2025-03-10	Reviewer C	Verified
S070	2025-03-11	Reviewer C	Pending
S071	2025-03-12	Reviewer C	Verified
S072	2025-03-13	Reviewer B	Verified
S073	2025-03-14	Reviewer A	Verified
S074	2025-03-15	Reviewer A	Verified
S075	2025-03-16	Reviewer A	Verified
S076	2025-03-17	Reviewer C	Verified
S077	2025-03-18	Reviewer C	Verified
S078	2025-03-19	Reviewer B	Verified
S079	2025-03-20	Reviewer A	Verified
S080	2025-03-21	Reviewer C	Verified
S081	2025-03-22	Reviewer A	Verified
