# Supplementary material
Source: Research Square preprint supplement (doi:10.21203/rs.3.rs-9151448/v1)
Supplement: Supplementary file 5 [file fda52770d08a75c2c16bbd5f.xlsx]

## Sheet: PRISMA_Checklist
Section	Item	Description	Reported	Page_Number	Notes
TITLE	Title	Identify the report as a systematic review.	Yes	Page 1	Title: Systematic Literature Review: Applications of DFT...
ABSTRACT	Structured summary	Provide a structured summary including background, objectives, data sources, study eligibility criteria, participants, interventions, study appraisal methods, synthesis methods, results, limitations, conclusions, and funding.	Yes	Page 1	Structured abstract with all required elements included
INTRODUCTION	Rationale	Describe the rationale for the review in the context of existing knowledge.	Yes	Page 2-3	Comprehensive background on DFT and in silico methods provided
INTRODUCTION	Objectives	Provide an explicit statement of the objectives or questions the review addresses.	Yes	Page 3	Five specific research questions listed
METHODS	Eligibility criteria	Specify inclusion and exclusion criteria and any restrictions (e.g., date, language).	Yes	Page 4-5	Detailed criteria in Section 2.3
METHODS	Information sources	Specify all databases, registers, websites, organizations, reference lists, and other sources searched.	Yes	Page 4	5 databases and 3 other sources listed
METHODS	Search strategy	Present the full search strategies for all databases and information sources.	Yes	Page 4-5 & Appendix B	Complete search strings provided
METHODS	Selection process	Specify the methods used to decide whether a study met the inclusion criteria.	Yes	Page 5	Two independent reviewers, Rayyan QCRI used
METHODS	Data collection process	Specify the methods used to collect data from reports.	Yes	Page 5-6	Standardized extraction form, pilot tested
METHODS	Data items	List and define all variables for which data were sought.	Yes	Page 6 & Supp Mat 2	Comprehensive list in 7 categories
METHODS	Study risk of bias assessment	Specify the methods used to assess risk of bias in the included studies.	Yes	Page 6	Adapted criteria for computational studies
METHODS	Effect measures	Specify for each outcome the effect measure(s) used.	N/A	-	Narrative synthesis, no meta-analysis performed
METHODS	Synthesis methods	Describe the processes used to decide which studies were eligible for each synthesis.	Yes	Page 6	SWiM guidelines followed
METHODS	Reporting bias assessment	Describe any methods used to assess risk of bias due to missing results.	Yes	Page 6	Funnel plots not applicable, narrative assessment
METHODS	Certainty assessment	Describe any methods used to assess certainty of evidence.	Yes	Page 6	Quality assessment scores used
RESULTS	Study selection	Give numbers of studies screened, assessed for eligibility, and included.	Yes	Page 7-8 & Figure 1	PRISMA flow diagram with 815 records
RESULTS	Study characteristics	Cite each included study and present its characteristics.	Yes	Page 8-9 & Supp Mat 1	Table 1 and complete list in SM1
RESULTS	Risk of bias in studies	Present assessments of risk of bias for each included study.	Yes	Page 14 & Supp Mat 2	Quality scores in SM2
RESULTS	Results of individual studies	For all outcomes, present for each study: summary statistics and effect estimates.	Yes	Page 9-13	Comprehensive results in 6 subsections
RESULTS	Results of syntheses	Present results of all statistical syntheses conducted.	N/A	-	Narrative synthesis only
RESULTS	Reporting biases	Present assessments of risk of bias due to missing results.	Yes	Page 14	Discussed in limitations
RESULTS	Certainty of evidence	Present assessments of certainty of evidence.	Yes	Page 14	Quality categories assigned
DISCUSSION	Discussion	Discuss limitations of the review and the evidence included.	Yes	Page 14-15	Section 4.5: Limitations of Included Studies
DISCUSSION	Conclusions	Provide a general interpretation of the results.	Yes	Page 16	Section 5: Conclusions with 5 key points
OTHER	Registration and protocol	Provide registration information and access to protocol.	Yes	Page 4	PROSPERO registration mentioned
OTHER	Support	Describe sources of financial or non-financial support.	Yes	Page 17	Funding statement included
OTHER	Competing interests	Declare any competing interests.	Yes	Page 17	No competing interests declared
OTHER	Availability of data	Report which data are available and where.	Yes	Page 17 & Supp Mat	All data in supplementary materials
COMPUTATIONAL SPECIFIC	Software versions	Report versions of all computational software used	Yes	Page 10, SM2	Detailed in methodology sheets
COMPUTATIONAL SPECIFIC	Hardware specifications	Report computational resources used	Partial	N/A	Not consistently reported in original studies
COMPUTATIONAL SPECIFIC	Input files availability	Make input files available or describe parameters	Partial	SM2	Extracted when available
COMPUTATIONAL SPECIFIC	Benchmark comparisons	Compare with experimental or high-level methods	Yes	Page 10-11	Validation approaches documented

## Sheet: Summary
Item	Count
Total Checklist Items	32
Items Reported (Yes)	28
Items Not Applicable (N/A)	2
Items Partially Reported	2
Compliance Rate	87.5%

## Sheet: Section_Breakdown
Section	Total_Items	Items_Reported	Compliance
ABSTRACT	1	1	100.0%
COMPUTATIONAL SPECIFIC	4	2	50.0%
DISCUSSION	2	2	100.0%
INTRODUCTION	2	2	100.0%
METHODS	11	10	90.9%
OTHER	4	4	100.0%
RESULTS	7	6	85.7%
TITLE	1	1	100.0%
